## Signaling pathway dysregulation in breast cancer

Dinara Ryspayeva<sup>1,2,3,4</sup>, Attila A. Seyhan<sup>1,2,3,4,5</sup>, William J. MacDonald<sup>1,2,3,4</sup>, Connor Purcell<sup>1,2,3,4</sup>, Tyler J. Roady<sup>1,2,3,4,5</sup>, Maryam Ghandali<sup>1,2,3,4</sup>, Nataliia Verovkina<sup>1,2,3,4</sup>, Wafik S. El-Deiry<sup>1,2,3,4,5,7</sup>, Martin S. Taylor<sup>2,3,4,5,6</sup> and Stephanie L. Graff<sup>4,7</sup>

<sup>1</sup>Laboratory of Translational Oncology and Experimental Cancer Therapeutics, Warren Alpert Medical School, Brown University, RI 02903, USA

<sup>2</sup>Department of Pathology and Laboratory Medicine, Warren Alpert Medical School, Brown University, RI 02903, USA

<sup>3</sup>Joint Program in Cancer Biology, Lifespan Health System and Brown University, RI 02903, USA

<sup>4</sup>Legorreta Cancer Center at Brown University, RI 02903, USA

<sup>5</sup>Pathobiology Graduate Program, Brown University, RI 02903, USA

<sup>6</sup>Brown Center on the Biology of Aging, Brown University, RI 02903, USA

<sup>7</sup>Department of Medicine, Hematology/Oncology Division, Lifespan Health System and Brown University, RI 02903, USA

**Correspondence to:** Dinara Ryspayeva, **email:** dinara\_ryspayeva@brown.edu

**Keywords:** breast cancer; oncogenic pathways; signal dysregulation in cancer; therapeutic approaches; clinical trials

**Received:** December 20, 2024

**Accepted:** March 03, 2025

**Published:** March 13, 2025

**Copyright:** © 2025 Ryspayeva et al. This is an open access article distributed under the terms of the [Creative Commons Attribution License](#) (CC BY 4.0), which permits unrestricted use, distribution, and reproduction in any medium, provided the original author and source are credited.

### ABSTRACT

**This article provides a comprehensive analysis of the signaling pathways implicated in breast cancer (BC), the most prevalent malignancy among women and a leading cause of cancer-related mortality globally. Special emphasis is placed on the structural dynamics of protein complexes that are integral to the regulation of these signaling cascades. Dysregulation of cellular signaling is a fundamental aspect of BC pathophysiology, with both upstream and downstream signaling cascade activation contributing to cellular process aberrations that not only drive tumor growth, but also contribute to resistance against current treatments. The review explores alterations within these pathways across different BC subtypes and highlights potential therapeutic strategies targeting these pathways. Additionally, the influence of specific mutations on therapeutic decision-making is examined, underscoring their relevance to particular BC subtypes. The article also discusses both approved therapeutic modalities and ongoing clinical trials targeting disrupted signaling pathways. However, further investigation is necessary to fully elucidate the underlying mechanisms and optimize personalized treatment approaches.**

### INTRODUCTION

Breast cancer (BC) is one of the most common cancers in women and a leading cause of cancer-related deaths both in the US and globally [1, 2]. In 2022, over 2 million new BC cases were reported, along with 650,000 deaths, making BC the most prevalent malignant tumor worldwide [3].

BC is a heterogeneous disease comprising several major molecular subtypes [4]. It is well established that BC can be classified based on the expression of estrogen receptor (ER), progesterone receptor (PR), and human

epidermal growth factor receptor 2 (HER2) into clinical subtypes including hormone receptor positive, HER2-negative (luminal A or luminal B on molecular testing), HER2-overexpressing (HER2+), or BC negative for ER, PR, and HER2 (ER-/PR-/HER2-), often referred to as triple-negative breast cancer (TNBC), most consistent with the basal subtype on molecular testing. Identifying molecular subtypes is a major step toward the selection of the treatment strategy and prediction of the treatment outcome.

The treatment landscape for BC includes surgery, chemotherapy, radiotherapy, endocrine therapy (ET), targeted therapy (TT), and immunotherapy, requiring

collaboration among various subspecialties [5, 6]. Advances in therapeutic approaches have expanded the treatment options for patients with both metastatic and early-stage BC. As of December 2023, the U.S. Food and Drug Administration (FDA) has approved 86 drugs for BC treatment, including chemotherapy agents, TT, and immune checkpoint inhibitors (*NCI. Drugs Approved for Breast Cancer*. Available from: <https://www.cancer.gov/about-cancer/treatment/drugs/breast>).

The complexity and heterogeneity of tumors underscore the importance of precision medicine in cancer therapy. Expanding the range of targeted molecular alterations can enhance treatment efficacy [7, 8].

Key challenges in treating BC include issues related to both *de novo* and acquired resistance to systemic treatments. This resistance often arises from the dysregulation of signaling pathways within cancer cells, complicating treatment efforts [9, 10]. BC progression involves disruptions in various intra- and intercellular signaling pathways within normal mammary tissues and their surrounding microenvironment. Oncogenic mutations or abnormal expression of signaling components disturb these regulatory networks, leading to uncontrolled tumor cell proliferation, evasion of apoptosis, and tissue invasion [11].

A comprehensive understanding of these dysregulated and dynamic signaling pathways can greatly enhance our knowledge of tumor pathophysiology and guide the development of improved targeted cancer therapies. This review explores the critical roles of various signaling pathways in breast tumor development.

## PI3K/AKT/MTOR PATHWAY

The PI3K/Akt/mTOR signaling pathway (Figure 1) is pivotal in regulating cell growth, proliferation, metabolism, and survival [12–14]. Up to 25–40% of BC cases exhibit variations that hyperactivate the PI3K/Akt/mTOR pathway, underscoring its critical role in oncogenesis [15–17].

### PIK3CA gene mutation

PI3K produces the phospholipid phosphatidyl-3,4,5-triphosphate (PIP<sub>3</sub>) in the inner leaflet of the plasma membrane by phosphorylating Phosphatidylinositol 4,5-bisphosphate (PIP<sub>2</sub>) and is the first step in the most frequently altered pathway in BC. Mutations and amplifications commonly occur in the genes encoding the PI3K catalytic subunits p110 $\alpha$  (PIK3CA) and p110 $\beta$  (PIK3CB) [12, 16, 18, 19]. These genetic alterations lead to constitutive activation of the PI3K pathway, which drives oncogenic processes such as cell growth, survival, and proliferation. This pathway plays a central role in ER-positive BCs.

PIK3CA mutations were found in 32% of early BC patients and were associated with favorable

clinicopathologic characteristics, such as older age, ER positivity, lower grade, and smaller tumor size [20]. The prevalence of PIK3CA mutations is 18% in TNBC, 22% in HER2-positive, and 37% in luminal subtypes [21].

It is important to note that these findings are different from reports linking PI3K pathway activation to resistance to ET [22, 23]. Although PIK3CA mutations can occur throughout the gene, up to 80% of PIK3CA mutations occur in hotspots within the helical (E542K and E545K) and kinase (H1047R) domains of p110 $\alpha$ . These mutations significantly increase PI3K activity, leading to the induction of cellular transformation *in vitro* and tumorigenicity *in vivo* when overexpressed in human mammary epithelial cells. Moreover, transgenic mice expressing these mutant forms of p110 $\alpha$  develop mammary tumors, highlighting their oncogenic potential. The mutations more frequent in tumors that relapse during ongoing ET (48%). The hyperactivation of the PI3K pathway, often driven by these mutations, is associated with resistance to ET in BC [22, 23].

### Loss of PTEN

PTEN (Phosphatase and Tensin Homolog) is a tumor suppressor that negatively regulates the PI3K/Akt/mTOR pathway by dephosphorylating PIP<sub>3</sub> back to PIP<sub>2</sub>, thus inhibiting Akt activation [24, 25].

Loss of PTEN function, whether due to mutations, deletions, or epigenetic silencing, removes this regulatory brake, resulting in sustained pathway activation and cancer progression [24].

Transcription of the PTEN gene is regulated at multiple levels [24–28]. Epigenetic and transcriptional positive regulation involves factors such as early growth response protein-1 (EGFR-1), peroxisome proliferator-activated receptor- $\gamma$  (PPAR- $\gamma$ ), tumor protein 53 (p53), human sprout homolog 2 (SPRY2) and activating transcription factor 2 (ATF2). Transcriptional regulation is also controlled by negative regulators, including c-Jun, nuclear factor kappa B (NF- $\kappa$ B), transforming growth factor beta (TGF- $\beta$ ), and the polycomb group protein BMI1 [24, 29, 30]. Additionally, SNAIL and SLUG repress PTEN expression at the transcriptional level. Epigenetic mechanisms, including promoter methylation and histone modifications, can also lead to the silencing of PTEN expression [24].

At the post-transcriptional level, various miRNAs have been identified that downregulate PTEN expression [24, 26, 28, 31]. Additionally, post-translational modifications of PTEN by SUMOylation [32], phosphorylation of the C-terminal tail [33, 34], acetylation [35, 36], ubiquitination [37, 38] and other novel modifications were described in review [39].

The PTEN promoter has been described as a potential target in BC [40–45]. Research indicates that loss of PTEN may predict more aggressive disease and poorer

outcomes in patients with BC and is more commonly observed in TNBC [46–48]. The loss of PTEN contributes to disease progression and resistance to TT by driving activation of the PI3K pathway, as well as functional “cross-activation” of the MAPK pathway [49].

## Akt amplification and mutation

The serine/threonine protein kinase Akt also referred to as protein kinase B (PKB) protein kinase B (PKB),

is activated by the PI3K pathway by binding to PI3K-produced PIP<sub>3</sub> through its N-terminal Pleckstrin homology (PH) domain at the plasma membrane [14, 50]. Akt (which we use to refer to Akt1) is subsequently phosphorylated by mTORC2 on its hydrophobic motif Ser473, relieving autoinhibition and permitting subsequent phosphorylation at Thr308 in the activation loop by PDK1 and resultant full activation [51–54]. The Akt kinase family consists of three homologous and highly similar isoforms: Akt1 (PKB $\alpha$ ), Akt2 (PKB $\beta$ ) and Akt3 (PKB $\gamma$ ). Akt1 plays a critical role

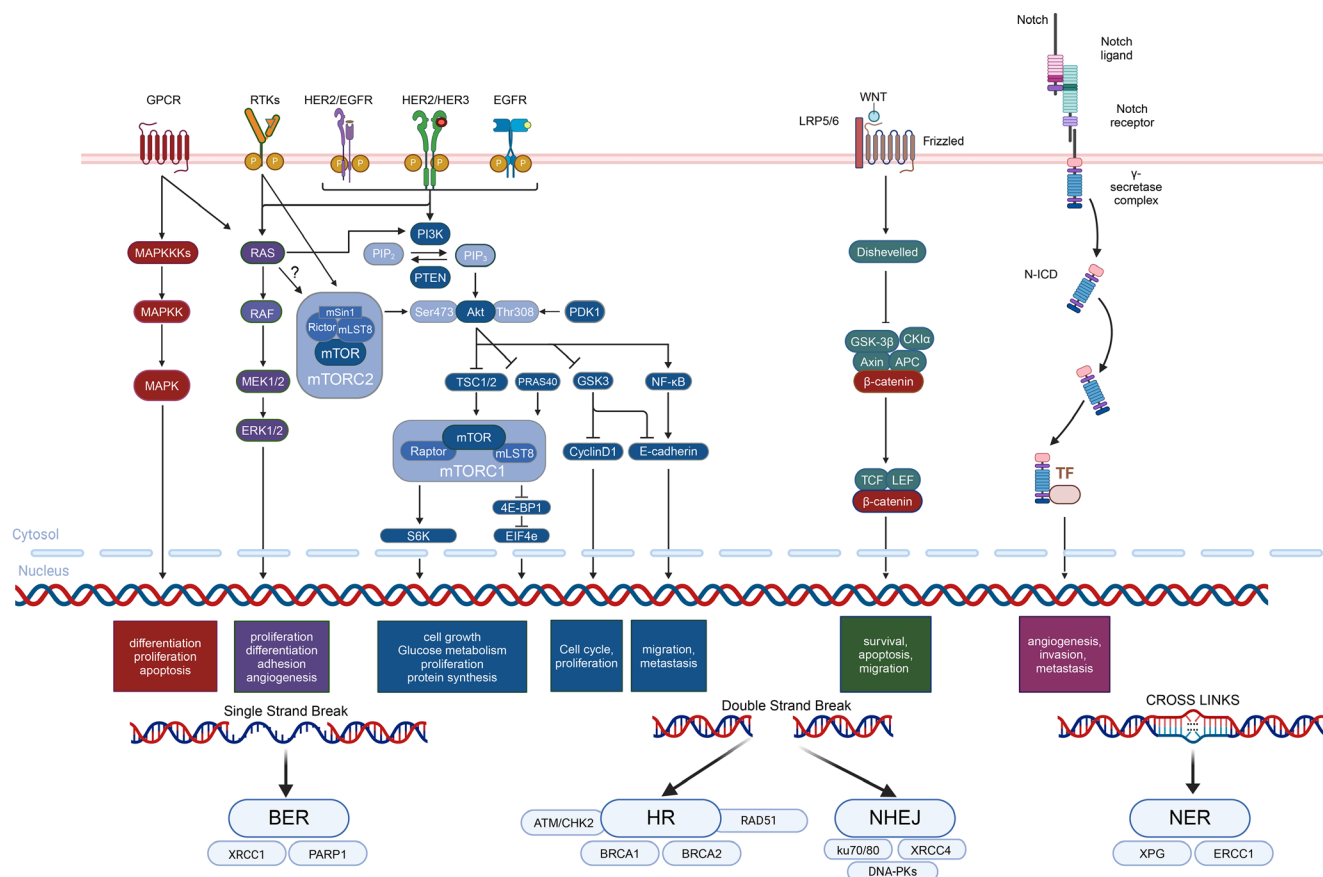

**Figure 1: Key signaling pathways and targeted factors in dysregulated BC.** This figure illustrates the major signaling pathways and their intricate crosstalk in BC, focusing on the GPCR, RTKs, RAS/RAF/MEK1/2/ERK1/2, MAPK, HER2, PI3K/Akt/mTOR, Wnt/β-catenin, NF-κB, Notch, and DDR pathways. These pathways are critical in regulating essential cellular processes such as proliferation, survival, differentiation, and metastasis. The MAPK pathway, initiated by RTKs like EGFR and HER2, activates downstream effectors such as RAS, RAF, MEK, and ERK1/2, driving cell growth and survival. HER2 amplification further drives oncogenesis by activating the MAPK and PI3K/Akt pathways, with HER3 and HER4 modulating these signals. The PI3K/Akt/mTOR pathway controls cell growth and metabolism through Akt activation and downstream targets like mTORC1/2, p70S6K1, and 4E-BP1. Mutations in PIK3CA and loss of PTEN contribute to its hyperactivation. The Wnt/β-catenin pathway promotes EMT and metastasis, driven by Wnt signaling through LRP5/6 and β-catenin, which interact with APC, CK1 $\alpha$ , and TCF/LEF. The NF-κB pathway is a central signaling network regulating inflammation, immune responses, and cell survival. This pathway is activated through Tumor Necrosis Factor Receptors (TNFR), Toll-like Receptors (TLRs), and the IκB kinase (IKK) complex. The Notch pathway, triggered by receptor-ligand interactions between Notch receptors and ligands like DLL, governs cell fate determination and contributes to cancer progression by promoting proliferation and maintaining cancer stem cells. The DDR pathway is essential for maintaining genomic stability by detecting and repairing DNA damage. It responds to various types of damage, including DSBs, SSBs, and cross-links, by activating repair mechanisms such as HR for DSBs and NER to other kinds of damage. In BC, dysregulation of the DDR pathway, often due to mutations in genes like BRCA1 and BRCA2, impairs DNA repair, leading to genomic instability and an increased risk of cancer.

**Table 1: mTORC1 and mTORC2 complexes**

| mTORC1       | mTORC2       |
|--------------|--------------|
| mTOR protein | mTOR protein |
| Raptor       | Rictor       |
| GβL/mLST8    | GβL/mLST8    |
| DEPTOR       | DEPTOR       |
| PRAS40       | Protor/PRR5  |
|              | mSIN1        |

in multiple cellular processes, including growth, survival, and metabolism, while Akt2 is central to maintaining glucose homeostasis. Akt3 is primarily involved in neuronal development [55].

Alterations in the *AKT* gene, such as amplification or mutation, can enhance Akt kinase activity, which is linked to worse survival outcomes, especially in ER-negative BC [56, 57]. Mutations in *AKT1*, *AKT2*, or *AKT3* are found in roughly 3–5% of cancers, with the most common functionally activating *AKT* mutations being E17K, L52R, and Q79K [58–62]. *AKT* mutations are frequently observed in hormone-driven cancers, particularly in ER-positive BC subtypes [63].

In BC the three Akt isoforms play distinct roles in regulating migration and other cellular functions [50, 64–67]. Akt1 is primarily responsible for the proliferative potential of cells by upregulating Cyclin D1 and S6 and is more highly expressed in the primary BC tumor sample from the breast. *AKT1* E17K is the most frequently identified oncogenic mutation in Akt1 [61]. In contrast, Akt2 expression is elevated in lung and liver metastatic samples, where it is associated with increased invasiveness, stem cell-like characteristics, and resistance to therapies [65, 66]. Akt3 is mainly amplified and highly expressed in TNBC tumors and cell lines, where it plays a crucial role in regulating tumor growth and progression [64, 68, 69].

### mTOR activation

The mammalian target of rapamycin (mTOR) is a 289 kDa serine/threonine kinase that plays a key role in regulating cell growth and metabolism. Its activation can occur due to mutations in upstream components or alterations in nutrient and energy-sensing mechanisms [70, 71]. The mTOR signaling cascade comprises two distinct multi-subunit complexes: mTORC1 and mTORC2, each formed by the mTOR kinase associating with different adapter proteins [72, 73].

The large megadalton mTORC1 and mTORC2 complexes were identified as assemblies of multiple proteins, as shown in Table 1. They differ based on the binding of (Raptor) or (Rictor and mSin1) to (mTOR+mLST8), which leads to the formation of mTORC1 and mTORC2, respectively [72]. The two complexes have distinct and sometimes opposing

functions and feedback loops; a simplified summary is that mTORC1 on the lysosome surface synthesizes signals from nutrients and stress to promote anabolism vs catabolism, and mTORC2 at the plasma membrane synthesizes signals from outside the cell including various growth factors such as insulin to control growth and metabolism [74].

Aberrant mTOR signaling is a hallmark of many cancers and is associated with increased tumor progression [75]. The activation of the mTOR pathway (Figure 1) depends on activating mutations in mTOR, mTORC1/2, or upstream mutations, as well as the loss of function of negative regulators in the mTOR signaling cascade [73, 76].

Mutations in core components of the mTOR complexes (mTORC1 and mTORC2) are rarer than the more common upstream mutations in pathways such as Akt and TSC1/2 (tuberous sclerosis complex proteins). These mutations often result in the overactivation of mTORC1, which is crucial for cancer progression and resistance to therapy [77].

mTORC1 plays a central role in maintaining the balance between anabolic and catabolic processes, especially in response to environmental stress. TSC1 and TSC2 are crucial negative regulators of mTORC1. They inhibit mTORC1 activity by transforming the small GTPase Rheb (Ras homolog enriched in the brain) into its inactive GDP-bound state. This mechanism prevents uncontrolled cell growth and proliferation [70, 78]. mTORC1 is also controlled and regulated at the lysosome surface by the two small heterodimeric GTPases Raga/B and RagC/D, forming a bipartite switch modulated by numerous proteins including the tumor suppressor FLCN; together these three GTPases tightly control mTORC1 activity [74, 79–83].

TSC1 and TSC2 are tumor suppressors, and their loss or mutation causes widespread but benign tumors. In TSC mutant cells, mTORC1 is constitutively active, therefore stimulating translation and promoting cell growth [84]. Low expression of TSC 1/2 is associated with more aggressive BC and worse outcomes [85]. TSC2 normally inhibits mTORC1 by promoting the conversion of Rheb-GTP to its inactive form, Rheb-GDP. When TSC2 is lost or its function is impaired, this conversion is hindered, resulting in elevated Rheb-GTP levels and subsequent activation of mTORC1 [14, 71, 86].

There are a variety of upstream pathways that control mTORC1 activation, including growth factor signaling, amino acid levels, cellular energy levels, and stress (in review [70, 71, 74]. Akt modulates mTORC1 activity by phosphorylating PRAS40, a key inhibitor of mTORC1. This phosphorylation removes PRAS40's inhibition, thereby enhancing mTORC1 activation [87]. The Ras-Erk MAPK pathway can also activate mTORC1 downstream. When Erk is activated, it directly phosphorylates and inactivates TSC2.

mTORC2 is less well understood than mTORC1 but acts as a regulated effector of IGF and PI3K signaling [71, 74]. It also appears to modulate a portion of signaling downstream of oncogenic Ras [88, 89]. Rictor, a core component of mTORC2, is sometimes highly amplified in patients with lung cancer and BC. In addition to activation of Akt, mTORC2 activates numerous members of the AGC kinase family including PKC, PKN, and SGK controlling metabolism, cell division, and migration [72, 90]. Intriguingly, SGK may substitute for Akt activity as a resistance mechanism in Akt inhibition [91, 92]. Development of selective mTORC2 inhibitors could prevent such a mechanism, but selective inhibitors of mTORC2 vs mTORC1 are not available and have been challenging to make because both complexes include mTOR as the key active component in essentially identical conformations.

## Therapeutic approaches

Given the critical role of the PI3K/Akt/mTOR pathway in cancer, numerous therapeutic strategies have been devised to target various components of this pathway. Targeting the PI3K/Akt/mTOR signaling pathways has led to the development of drugs that address mechanisms of endocrine resistance [93].

### PI3K inhibitors

Numerous PI3K inhibitors in clinical development inhibit all catalytic subunit isoforms, such as p110 $\alpha$ , p110 $\beta$ , and p110 $\delta$ . However, some inhibitors are designed to target only specific isoforms [94]. Despite challenges such as poor drug tolerance and resistance, several PI3K inhibitors have now received regulatory approval (Table 2) [95].

Alpelisib is a p110 $\alpha$ -selective inhibitor, approved for the treatment of PIK3CA-mutated ER/PR-positive, HER2-negative BC in 2019 [96].

Taselisib, a p110 $\beta$ -sparing inhibitor, demonstrated statistical improvement in PFS in the phase III study, but with serious side effects and was not approved by the FDA [16, 18].

Inavolisib, a p110 $\alpha$ -selective degrader, was approved by the FDA on October 10, 2024, based on the results of the INAVO120 trial [97, 98]. It continues

to be developed in early-stage BC treatment (Table 3, NCT05306041).

The pan PI3K inhibitor, pictilisib did not meet its primary endpoint in the PEGGY trial (ER+/HER2 negative BC, NCT01740336) [99].

Other PI3K inhibitors, such as TOS-358, MEN1611, OKI-219, STX-478, BBO-10203 and tenalisib are currently being investigated for BC in clinical trials (Table 3). Additionally, PI3K inhibitors, such as idelalisib, copanlisib, duvelisib, and umbralisib are used in hematological malignancies.

Different PIK3CA mutations might have distinct prognostic implications. The importance of multiple PIK3CA mutations is evaluated in trials (NCT04632992; NCT04589845, NCT05564377).

PI3K/Akt signaling pathway is overactivated in many human cancers, leading to excessive DNA damage response activation [100]. PTEN loss contributes to this issue by causing resistance to PI3K $\alpha$  inhibitors. Additionally, PTEN loss is a mechanism of acquired resistance to CDK4/6 inhibitors. Clinically, PTEN loss is relevant because it also reduces the effectiveness of PI3K $\alpha$  inhibitors, which are currently used after CDK4/6 inhibitors [101].

### Akt inhibitors

Clinical trials are currently exploring the use of Akt inhibitors, either as single agents or combined with other treatments, to address the oncogenic effects caused by Akt1 activation (Table 3, NCT03959891, NCT04253561 NCT05564377).

The findings suggest that different Akt mutants exhibit varying sensitivities to Akt inhibitors [61]. Drugs like capivasertib [102] and ipatasertib [103] block Akt kinase activity, targeting its pro-survival effects to improve outcomes in cancers driven by Akt mutation or hyperactivity.

Ipatasertib, an ATP-competitive selective Akt inhibitor, is currently being evaluated in clinical trials for its efficacy in BC (Table 3). While it did not demonstrate improved outcomes in PIK3CA/Akt1/PTEN-altered advanced TNBC [104], it has shown promising results in patients with HER2-positive mBC harboring PIK3CA mutations, according to preliminary findings from the phase 1b IPATHER trial (NCT04253561).

Capivasertib is a pan-Akt small-molecule inhibitor of all three Akt isoforms approved for the treatment of ER/PR-positive BC that is also has either PIK3CA-mutated or Akt-altered or demonstrated PTEN-loss (Table 2) [102].

### mTOR inhibitors

mTOR inhibitors, such as everolimus [105] and temsirolimus, are used in the treatment of various cancers, including renal cell carcinoma and BC. These drugs

**Table 2: Approved drugs for BC treatment**

| Agents                              |                                                       | Trial                                 | FDA           | Indication and disease setting                                                    | References                           |
|-------------------------------------|-------------------------------------------------------|---------------------------------------|---------------|-----------------------------------------------------------------------------------|--------------------------------------|
| <b>PI3K Inhibitors</b>              |                                                       |                                       |               |                                                                                   |                                      |
| Alpelisib                           | p110 $\alpha$ -selective inhibitor                    | Phase III, SOLAR-1 (NCT02437318)      | Approved 2019 | PIK3CA-mutated ER/PR-positive, HER2-negative mBC                                  | (André et al., 2019) [96]            |
| Inavolisib                          | p110 $\alpha$ -selective degrader                     | Phase III, INAVO120 (NCT04191499)     | Approved 2024 | PIK3CA-mutated HR-positive, HER2-negative, locally advanced or mBC                | (Turner et al., 2024) [98]           |
| <b>Akt Inhibitors</b>               |                                                       |                                       |               |                                                                                   |                                      |
| Capivasertib                        | Akt-inhibitor                                         | Phase III, CAItello-291 (NCT04305496) | Approved 2023 | ER/PR-positive, HER2-negative mBC with PIK3CA/Akt1/PTEN-alterations               | (Turner et al., 2023) [102]          |
| <b>mTOR Inhibitors</b>              |                                                       |                                       |               |                                                                                   |                                      |
| Everolimus                          | mTOR inhibitor                                        | Phase III, BOLERO-2 (NCT00863655)     | Approved 2012 | ER/PR-positive, HER2-negative mBC                                                 | (Baselga et al., 2012) [105]         |
| <b>Anti-HER2 therapeutic agents</b> |                                                       |                                       |               |                                                                                   |                                      |
| Trastuzumab                         | Anti-HER2 mAb                                         | Phase III                             | Approved 1998 | HER2+ mBC                                                                         | (Cobleigh et al., 1999) [320]        |
|                                     |                                                       | Phase III, HERA (NCT00045032)         | Approved 2006 | HER2+ eBC                                                                         | (Piccart-Gebhart et al., 2005) [321] |
| Pertuzumab                          | Anti-HER2 mAb                                         | Phase III, APHINITY (NCT01358877)     | Approved 2017 | HER2+ eBC in combination with trastuzumab and chemotherapeutic agents             | (von Minckwitz et al., 2017) [156]   |
|                                     |                                                       | Phase III, CLEOPATRA (NCT00567190)    | Approved 2012 | HER2+ mBC in combination with trastuzumab and docetaxel                           | (Swain et al., 2013) [322]           |
| Lapatinib                           | HER1/HER2 TKI inhibitor                               | Phase III, (NCT00078572)              | Approved 2007 | HER2+ mBC in combination with capecitabine                                        | (Geyer et al., 2006) [323]           |
| Neratinib                           | HER1/HER2/HER4 TKI inhibitor                          | Phase III, NALA (NCT01808573)         | Approved 2020 | HER2+ mBC after receiving 2 or more anti-HER2 based treatment regimens            | (Saura et al., 2020) [158]           |
|                                     |                                                       | Phase III, ExteNET (NCT00878709)      | Approved 2017 | HER2-overexpressed/amplified eBC, to follow adjuvant trastuzumab-based therapy    | (Martin et al., 2017) [324]          |
| Tucatinib                           | HER2/HER3 TKI inhibitor                               | Phase II, HER2CLIMB (NCT02614794)     | Approved 2020 | HER2+ mBC in combination with trastuzumab and capecitabine                        | (Murthy et al., 2020) [157]          |
| Ado-trastuzumab emtansine (T-DM1)   | Anti-HER2 monoclonal anti-microtubule agent conjugate | Phase III, EMILIA (NCT00829166)       | Approved 2013 | HER2+ mBC after trastuzumab and a taxane                                          | (Verma et al., 2012) [152]           |
|                                     |                                                       | Phase III, KATHERINE (NCT01772472)    | Approved 2019 | HER2+ eBC with residual invasive disease after neoadjuvant taxane and trastuzumab | (von Minckwitz et al., 2019) [325]   |

|                                         |                                                        |                                           |               |                                                                                                                                            |                             |
|-----------------------------------------|--------------------------------------------------------|-------------------------------------------|---------------|--------------------------------------------------------------------------------------------------------------------------------------------|-----------------------------|
| Fam-trastuzumab deruxtecan-nxki (T-DXd) | Anti-HER2 monoclonal topoisomerase inhibitor conjugate | Phase III, DESTINY-Breast03 (NCT03529110) | Approved 2022 | HER2+ mBC after receiving an anti-HER2 based treatment regimen                                                                             | (Cortés et al., 2022) [163] |
|                                         |                                                        | Phase III, DESTINY-Breast04 (NCT03734029) | Approved 2022 | Previously treated HER2-Low mBC                                                                                                            | (Modi et al., 2022) [326]   |
| Margetuximab-cmkb                       | Fc-engineered anti-HER2 mAb                            | Phase III, SOPHIA (NCT02492711)           | Approved 2020 | HER2+ mBC after receiving two or more anti-HER2 based treatment regimens                                                                   | (Rugo et al., 2023) [327]   |
| <b>PARP Inhibitors</b>                  |                                                        |                                           |               |                                                                                                                                            |                             |
| Olaparib                                | PARP1/ PARP2 inhibitor                                 | Phase III, OlympiA (NCT02032823)          | Approved 2022 | BRCA1 or BRCA2 germline mutations high-risk HER2-negative eBC                                                                              | (Tutt et al., 2021) [297]   |
|                                         |                                                        | Phase III, OlympiAD (NCT02000622)         | Approved 2018 | BRCA1 or BRCA2 germline mutations HER2-negative mBC after receiving no more than two previous chemotherapy regimens for metastatic disease | (Robson et al., 2017) [298] |
| Talazoparib                             | PARP1/ PARP2 inhibitor                                 | Phase III, EMBRACA (NCT01945775)          | Approved 2018 | germline mutations in BRCA1 and BRCA2 HER2-negative mBC                                                                                    | (Litton et al., 2018) [328] |

Abbreviations: eBC: early-stage breast cancer; mBC: metastatic breast cancer.

acutely inhibit mTORC1, leading to reduced protein synthesis and cell proliferation. However chronic therapy also inhibits mTORC2, and side effects include a diabetes-like state due to loss of insulin signaling [74].

AZD2014, also known as vistusertib, is a potent small-molecule ATP-competitive inhibitor of mTOR that selectively targets both mTORC1 and mTORC2 complexes. This dual inhibition provides a broader scope of action by addressing not only tumor growth but also resistance mechanisms that may arise due to mTORC2 activity. Preclinical studies have demonstrated that AZD2014 induces significant tumor regression, particularly in ER+ mBC [106]. It is currently being evaluated in clinical trials to further assess its therapeutic potential and efficacy in combination with other targeted therapies, with the goal of improving outcomes for patients with advanced BC (Table 3).

Dual inhibitors that target both PI3K and mTOR provide a more comprehensive blockade of the pathway. For example, gedatolisib aims to overcome resistance mechanisms that can develop when targeting only one component of the pathway (Table 3, NCT05501886). Gedatolisib has shown higher efficacy in BC patient-derived xenograft models [107].

In conclusion, the PI3K/Akt/mTOR pathway remains a cornerstone of cancer biology and a critical target for therapeutic intervention. Continued research and

clinical trials are essential to fully harness the potential of targeting this pathway, addressing resistance mechanisms, and improving patient outcomes.

## RAS/RAF/MEK/ERK PATHWAY

The RAS/RAF/MEK/ERK pathway, a key signaling axis often altered in cancer, is typically considered to be an infrequently mutated pathway in BC [108].

However, high-fidelity molecular techniques have uncovered the critical relevance of non-genetic RAS/RAF/MEK/ERK pathway activation in BC, enabling the effective use of advanced TT. This pathway is activated by oncogenic mutations, as well as epigenetic and transcriptional regulation not captured by genetic sequencing alone. The variability in RAS/RAF/MEK/ERK pathway alterations presents a major challenge in treating BC.

The RAS/RAF/MEK/ERK pathway consists of a GTPase and three layers of protein kinases that sequentially phosphorylate each other, transmitting extracellular signals to the cell nucleus where they influence cell division, differentiation, and survival [109]. The pathway is initiated when a cell surface receptor, such as a receptor tyrosine kinase (RTK), G-protein coupled receptor (GPCR), hormone receptor, or interleukin receptor, binds to its corresponding growth factor. Most commonly, this pathway is activated by ligand binding to an RTK, which leads to receptor dimerization and

**Table 3: Current clinical trials targeting BC: progress and emerging therapies**

| Drug name                                                 | Disease indications tested in trials                                                 | Interventions                                         | Development phase | Primary outcome measures                                        | Clinicaltrials.gov identifier |
|-----------------------------------------------------------|--------------------------------------------------------------------------------------|-------------------------------------------------------|-------------------|-----------------------------------------------------------------|-------------------------------|
| <b>PI3K inhibitors</b>                                    |                                                                                      |                                                       |                   |                                                                 |                               |
| PI3K $\alpha$ -selective inhibitor apelisib               | ER+/HER2- mBC                                                                        | Apelisib<br>Palaezstrant<br>Ribociclib<br>Everolimus  | Phase Ib          | DLTs<br>MTD                                                     | NCT05508906                   |
| PI3K $\alpha$ selective inhibitor inavolisib              | ER+/HER2+ PIK3CA mutant eBC                                                          | Inavolisib<br>PHESGO<br>Endocrine therapy             | Phase II          | pCR rate<br>(ypT0/is ypN0)                                      | NCT05306041                   |
| PI3K $\alpha$ H1047R mutation selective inhibitor OKI-219 | Advanced solid tumors with PI3K $\alpha$ H1047R mutation, including mBC              | OKI-219<br>Fulvestrant<br>Trastuzumab                 | Phase Ia/Ib       | MTD                                                             | NCT06239467                   |
| Covalent inhibitor of PI3K $\alpha$ mutation TOS-358      | Advanced solid tumors, including BC                                                  | TOS-358                                               | Phase I           | DLTs<br>RP2D                                                    | NCT05683418                   |
| Allosteric PI3K $\alpha$ inhibitor STX-478                | Advanced solid tumors with PI3K $\alpha$ mutations                                   | STX-478<br>Fulvestrant<br>Ribociclib<br>Palbociclib   | Phase I/II        | DLT<br>ORR                                                      | NCT05768139                   |
| PI3K $\delta$ -sparing inhibitor MEN1611                  | ER+/HER2- mBC with PIK3CA/PTEN-alterations                                           | MEN1611<br>Eribulin                                   | Phase II          | CBR<br>ORR                                                      | NCT05810870                   |
| Dual PI3K $\delta/\gamma$ inhibitor tenalisib             | mTNBC                                                                                | Tenalisib (RP6530)                                    | Phase II          | CBR<br>ORR<br>PFS                                               | NCT06189209                   |
| Pan-PI3K/mTOR inhibitor Gedatolisib                       | ER+/HER2- mBC                                                                        | Gedatolisib<br>Palbociclib<br>Fulvestrant<br>Apelisib | Phase III         | PFS                                                             | NCT05501886                   |
| Pan-PI3K and mTOR inhibitor GDC-0084                      | HER2+ mBC with brain metastases                                                      | GDC-0084<br>Trastuzumab                               | Phase II          | CNS-ORR                                                         | NCT03765983                   |
| PI3K $\alpha$ :RAS breaker BBO-10203                      | Advanced solid tumors (BREAKER-101)                                                  | BBO-10203<br>Trastuzumab                              | Phase I           | MTD<br>AEs<br>RP2D                                              | NCT06625775                   |
| <b>Akt inhibitors</b>                                     |                                                                                      |                                                       |                   |                                                                 |                               |
| Ipatasertib                                               | HER2+ mBC with PI3KCA-mutations                                                      | Ipatasertib<br>Trastuzumab<br>Pertuzumab              | Phase Ib          | RP2D                                                            | NCT04253561                   |
| Ipatasertib                                               | eBC (TNBC) with and without PI3CA/AKT1/PTEN genetic alterations                      | Ipatasertib<br>Atezolizumab<br>Chemotherapy           | Phase I           | pCR                                                             | NCT05498896                   |
| Ipatasertib                                               | mBC (activating Akt mutations)<br>The ComboMATCH treatment trials (cohort EAY191-S3) | Ipatasertib<br>Paclitaxel                             | Phase II          | Accrual and assignment of patients<br>Enrollment rates to trial | NCT05564377                   |
| <b>mTOR inhibitors</b>                                    |                                                                                      |                                                       |                   |                                                                 |                               |
| Dual mTORC1/2 inhibitor vistusertib (AZD2014)             | mTNBC                                                                                | Vistusertib<br>Olaparib                               | Phase Ib/II       | MTD                                                             | NCT02208375                   |
| Vistusertib (AZD2014)                                     | ER+ mBC                                                                              | Vistusertib<br>Fulvestrant                            | Phase I           | AEs<br>Pharmacokinetics                                         | NCT01597388                   |
| <b>MEK inhibitors</b>                                     |                                                                                      |                                                       |                   |                                                                 |                               |
| Cobimetinib                                               | Inflammatory mBC                                                                     | Atezolizumab + Cobimetinib + Eribulin.                | Phase II          | ORR                                                             | NCT03202316                   |
| Selumetinib                                               | mTNBC (arm II)                                                                       | Olaparib<br>Selumetinib                               | Phase II          | ORR                                                             | NCT03801369                   |
| Binimetinib                                               | EAY191-N2 (NF1 mutations)<br>(ComboMATCH Trial)                                      | Binimetinib<br>Fulvestrant                            | Phase II          | Accrual and assignment of patients<br>Enrollment rates to trial | NCT05564377                   |



**Anti-HER2 TKIs**

## Early-stage HER2+ BC

|           |                                   |                                                                        |          |      |             |
|-----------|-----------------------------------|------------------------------------------------------------------------|----------|------|-------------|
| Pyrotinib | HER2+ microinvasive eBC (stage I) | Pyrotinib plus capecitabine (adjuvant therapy)                         | Phase II | iDFS | NCT05861271 |
| Pyrotinib | HER2+ eBC                         | Pyrotinib (extended adjuvant therapy)                                  | Phase II | iDFS | NCT05880927 |
| Pyrotinib | HER2+ high risk eBC               | Pyrotinib after adjuvant trastuzumab combined with pertuzumab or T-DM1 | Phase II | iDFS | NCT05834764 |
| Pyrotinib | Residual invasive HER2+ eBC       | Pyrotinib after neoadjuvant chemotherapy plus anti-HER2 therapy        | Phase II | iDFS | NCT04254263 |
| Pyrotinib | HER2+ eBC (neoadjuvant therapy)   | Pyrotinib combined with trastuzumab and chemotherapy                   | Phase II | pCR  | NCT04481932 |

## Metastatic setting

|                                |                                                                      |                                                                                |             |                                                            |             |
|--------------------------------|----------------------------------------------------------------------|--------------------------------------------------------------------------------|-------------|------------------------------------------------------------|-------------|
| Pyrotinib                      | HER2+ mBC                                                            | Pyrotinib combined with trastuzumab and chemotherapy in the first-line setting | Phase II    | PFS                                                        | NCT05429294 |
| Pyrotinib                      | HER2+ mBC with active brain metastases after ADCs                    | Pyrotinib plus capecitabine                                                    | Phase II    | CNS-ORR                                                    | NCT06475443 |
| Pan-HER receptor TKI Neratinib | HER2- mBC with brain metastasis and abnormally active HER2 signaling | Neratinib and Capecitabine                                                     | Phase II    | OS<br>CNS-PFS                                              | NCT04965064 |
| Neratinib                      | Stage I-III HER2+ eBC with detected molecular residual disease       | Neratinib and T-DM1 (adjuvant therapy)                                         | Phase II    | Clearance of ctDNA with the addition of neratinib to T-DM1 | NCT05388149 |
| Neratinib                      | HER2+ mBC with brain metastases (Cohort 1, 4)                        | Neratinib T-DM1                                                                | Phase II    | ORR<br>CNS-ORR                                             | NCT01494662 |
| Neratinib                      | HER2+ mBC                                                            | Neratinib Capecitabine                                                         | Phase Ib/II | MTD                                                        | NCT03377387 |
| Ibrutinib                      | HER2-amplified mBC in the setting of T-DM1-pretreated disease        | Trastuzumab plus Ibrutinib                                                     | Phase I/II  | MTD<br>CBR                                                 | NCT03379428 |

**HER2-Targeting ADC**

|           |                                                            |                      |             |                           |             |
|-----------|------------------------------------------------------------|----------------------|-------------|---------------------------|-------------|
| BB-1701   | HER2+ or HER2-low mBC                                      | BB-1701 (ADC)        | Phase II    | AEs<br>ORR                | NCT06188559 |
| SHR-A1811 | HER2+ eBC Neoadjuvant Treatment                            | SHR-A1811 Pyrotinib  | Phase II    | pCR                       | NCT05635487 |
|           | HER2+ eBC after treatment with trastuzumab and pertuzumab. | Pyrotinib ARX788     | Phase II    | RCB                       | NCT04983121 |
| ARX788    | HER2+ mBC after treatment T-DXd                            | ARX788               | Phase II    | ORR                       | NCT04829604 |
|           | HER2+ mBC after T-DXd therapy                              | ARX788               | Phase II    | ORR                       | NCT06578286 |
| IKS014    | HER2+ advanced solid tumors, including BC                  | IKS014               | Phase I     | RP2D<br>ORR               | NCT05872295 |
| FS-1502   | HER2+ mBC, HER2 expressed advanced solid tumors            | FS-1502              | Phase I     | DLT<br>MTD<br>RP2D<br>ORR | NCT03944499 |
|           | HER2+ mBC                                                  | FS-1502 versus T-DM1 | Phase III   | PFS                       | NCT05755048 |
|           | HER2+ mBC                                                  | GQ1001               | Phase I     | DLT<br>MTD<br>RP2D        | NCT04450732 |
| GQ1001    | HER2+ mBC after previous anti-HER2 treatment               | GQ1001+ pyrotinib    | Phase Ib/II | DLT<br>MTD<br>AEs<br>ORR  | NCT05575804 |

|                                               |                                                                            |                                                               |             |                                      |             |
|-----------------------------------------------|----------------------------------------------------------------------------|---------------------------------------------------------------|-------------|--------------------------------------|-------------|
| Degrader-antibody conjugate<br>ORM-5029       | HER2+ mBC and advanced solid tumors                                        | ORM-5029                                                      | Phase I     | MTD<br>AEs<br>ORR<br>DOR             | NCT05511844 |
| <b><i>KRAS inhibitor</i></b>                  |                                                                            |                                                               |             |                                      |             |
| KRAS G12C Inhibitor<br>Adagrasib (MRTX849)    | KRAS G12C Mutated Advanced Solid Tumors, including BC                      | Adagrasib<br>Olaparib                                         | Phase Ib    | AEs                                  | NCT06130254 |
| <b><i>Bispecific antibody (BsAb)</i></b>      |                                                                            |                                                               |             |                                      |             |
| Anti-HER2/SIRPα BsAb<br>IMM2902               | HER2+ mBC                                                                  | IMM2902                                                       | Phase I     | DLT<br>MTD<br>AEs<br>Toxicity        | NCT05076591 |
| Anti-SIRPα BsAb DS-1103a                      | HER2+ advanced solid tumors                                                | DS-1103a                                                      | Phase I     | DLT<br>AEs<br>ORR                    | NCT05765851 |
| HER2-targeting BsAb<br>Zanidatamab            | HER2+ mBC                                                                  | Zanidatamab                                                   | Phase III   | PFS                                  | NCT06435429 |
| <b><i>Vaccines</i></b>                        |                                                                            |                                                               |             |                                      |             |
| Multi-epitope HER2 peptide vaccine TPIV100    | Stage II-III HER2+ eBC with residual disease post-neoadjuvant chemotherapy | TPIV100                                                       | Phase II    | iDFS                                 | NCT04197687 |
| HER2/neu peptide vaccine<br>GLSI-100          | HLA-A*02 positive and HER2+ high risk eBC                                  | GLSI-100                                                      | Phase III   | Invasive Breast Cancer-free Survival | NCT05232916 |
| WOKVAC vaccine                                | HER2+ eBC                                                                  | pUMVC3-IGFBP2-HER2-IGF1R plasmid DNA Vaccine + anti-HER2-mAbs | Phase II    | TILs                                 | NCT04329065 |
| HER-2 Directed dendritic Cell (DC1)           | HER2+eBC                                                                   | HER-2 pulsed DC1<br>Trastuzumab<br>Pertuzumab                 | Phase II    | pCR rate<br>Immunogenicity           | NCT05325632 |
| Dendritic cell vaccine                        | HER2- mBC                                                                  | CircFam53B-219aa DC vaccine                                   | Phase I     | DLT<br>AEs                           | NCT06530082 |
| Dendritic cell vaccines against HER2/HER3     | HER2+ BC or TNBC with brain metastasis                                     | Anti-HER2/HER3 dendritic cell vaccine<br>Pembrolizumab        | Phase II    | CNS - ORR                            | NCT04348747 |
| <b><i>Target DDR pathway</i></b>              |                                                                            |                                                               |             |                                      |             |
| Selective PARP1 inhibitor saruparib (AZD5305) | Advanced solid cancers                                                     | AZD5305                                                       | Phase I/IIa | AEs<br>DLT                           | NCT04644068 |
| Selective PARP1 inhibitor saruparib (AZD5305) | ER+/HER2- mBC with BRCA1, BRCA2, or PALB2 mutations (arm 1)                | Saruparib<br>Camizestrant                                     | Phase III   | PFS                                  | NCT06380751 |
| Selective PARP1 inhibitor HRS-1167            | gBRCA1/2 HER2- eBC (neoadjuvant therapy)                                   | HRS-1167                                                      | Phase II    | DLT<br>AEs<br>pCR rate               | NCT06516289 |
| DNA polymerase (pol) theta inhibitor ART6043  | HER2-ve mBC, g/sBRCA mutations                                             | ART6043                                                       | Phase I/IIa | DLT<br>PFS                           | NCT05898399 |
| ATR Inhibitor M1774                           | ER+/HER2- mBC after CDK4/6 inhibitors                                      | M1774<br>Fulvestrant                                          | Phase I/II  | DLT                                  | NCT05986071 |
| HDAC Tucidinostat                             | ER+/HER2- mBC                                                              | Tucidinostat                                                  | Phase 2     | ORR                                  | NCT05633914 |

Abbreviations: ADC: antibody-drug conjugate; AEs: adverse events; CBR: clinical benefit rate; CNS: central nervous system; DLTs: dose limiting toxicities; DLTs: dose limiting toxicities; DOR: duration of response; MTD: maximum tolerated dose; MTD: maximum tolerated dose; ORR: overall response rate; OS: overall survival; pCR: pathologic complete response; PFS: progression free survival; RCB: residual tumor burden classification in grades; RP2D: recommended phase II dose; TILs: tumor-infiltrating lymphocytes.

autophosphorylation of its intracellular domain. This activation recruits guanine nucleotide exchange factors (GEFs) that activate Ras, a member of the GTPase family. Ras proteins, encoded by the *HRAS*, *NRAS*, and *KRAS* genes, act as molecular switches; they are tethered to the

plasma membrane and activated when GEFs exchange GDP for GTP, moving Ras into an active state. However, because Ras has low enzymatic activity, GTPase-activating proteins (GAPs) accelerate this process. Once activated by GTP, Ras binds to the cytoplasmic RAF

kinase, most commonly BRAF, which then dimerizes and activates MEK through phosphorylation. Phosphorylated MEK, in turn, phosphorylates ERK (Figure 1). Activated ERK then triggers various transcription factors, including *ETS1/2*, *ELK1*, and *JUN*, which regulate cell development, migration, and growth [110–112]. This pathway is notable for its significant signal amplification, where one upstream protein can activate multiple downstream effectors. Non-canonical Ras signaling has recently been identified and a portion of oncogenic Ras signaling is conveyed by mTORC2; intriguingly genetic ablation of mTORC2 in a mouse model system of Ras activated melanoma resulted in markedly reduced tumor growth [88].

### **RAS/RAF/MEK/ERK pathway aberrations and prognostic impact**

This signal amplification significantly worsens the oncogenic effect of this pathway when dysregulated in cancer. In BC, the core RAS/RAF/MEK/ERK genes are rarely mutated, with *KRAS*, *HRAS*, *NRAF*, and *BRAF* gene mutation rates of less than 1% across all subtypes [113–116]. Additionally, *NF1*, which hydrolyzes GTP on Ras, thereby deactivating it, shows mutation rates between 3.0% and 3.8% [113, 117]. TNBC stands out as *KRAS* and *BRAF* mutations are observed at rates of 30% and 32%, respectively. In TNBC, these mutations are perhaps incentivized due to the lack of pro-growth signaling from hormone receptors and RTK HER2 [117]. An analysis of 2859 patient samples demonstrated that gene alterations, which include mutations, copy number alterations, and structural variants, were limited to below approximately 2% of patients for the genes *NF1*, *KRAS*, *HRAS*, *BRAF*, *MAPK1*, *JUN*, and *RAF1* across BC subtypes. Notable exceptions were *NF1*, *KRAS*, and *BRAF* alterations in basal-type cancer, as well as increased *NF1* and *KRAS* in HER2-positive disease [118]. In the same study, genetic alterations in the RAS/RAF/MEK/ERK genes were linked to significantly reduced overall patient survival when all BC subtypes were combined.

The RAS/RAF/MEK/ERK is also non-mutationally activated in BC due to overexpression of RTKs, especially in the HER2-positive phenotype [119]. RASAL2, a Ras GTPase-activating protein, shows promoter hypermethylation in 50% of luminal B tumors, reducing overall survival [120].

### **HER2+ pathway**

HER2 phenotype of BC, also known as ERBB2 or HER2-neu, represented overexpression in tumor cells. This phenotype makes up 20–25% of all BC cases [121, 122], and before HER2 targeting therapies was one of the subtypes with the worst clinical outcomes [123, 124]. Fortunately, modern therapeutics have improved outcomes

for HER2+ BC, but there is still more to do especially in the case of advanced metastatic disease [125, 126].

HER2 is a transmembrane protein with tyrosine kinase activity that falls into the epidermal growth factor (EGF) family of receptors; known for their function for stimulating cell growth and differentiation [121, 127–129]. However, unlike other EGF receptors, HER2 cannot function autonomously as it does not bind any growth factors itself, so it must act solely as a coreceptor through heterodimerization with the other 3 receptors found in the ERBB family or through homodimerization with another HER2 molecule [123, 130, 131]. In HER2+ BC dimerization most commonly occurs between the HER2 and HER3 receptors (Figure 1); HER3 can functionally bind ligands but is a catalytically dysfunctional tyrosine kinase so it acts primarily as an allosteric activator of the other family members [132–134]. Both HER2 and HER3 play a synergistic role in HER2+ BC progression and are both being used as targets for therapy [135, 136].

### **HER2+ pathway dysregulation in BC**

HER2 amplification alone is enough to result in spontaneous receptor dimerization and subsequent phosphorylation without ligand binding [137]. This leads to the constitutive activation of EGFR signaling pathways and their subsequent promotion of tumor progression [138, 139]. The most studied HER2 downstream signaling pathways are the RAS/Raf/Mitogen-activated protein kinase (MAPK) and the PI3K/Akt cascades (Figure 1).

The HER2+ subtype is highly dependent on the activation of the PI3K/Akt pathway for growth and tumor progression [140]. In 31% of all HER2+ tumors PIK3CA is mutated with 69% of those mutations being one of the following: H1047R (35%), E545K (17%), E542K (10%), and H1047L (5%) N345K (2%) and result in the aberrant activation of the PI3K pathway [141]. Mutations in PIK3CA not only drive oncogenesis but also often confer resistance to first-line trastuzumab treatment in BC [142, 143]. In HER2+ BC, PTEN mutations are less common than PIK3CA mutations, occurring in fewer than 10% of treatment-naïve primary tumors [117]. However, trastuzumab itself activates PTEN through the inhibition of Src kinase activity by blocking its association with ERBB2. Due to this pressure, 40% of HER2 overexpressing BC eventually develop PTEN deficiency resulting in primary or acquired resistance to trastuzumab [144, 145]. PI3K inhibitors have been shown to resensitize PI3K and PTEN-altered HER2+ trastuzumab-resistant cells *in vitro* and *in vivo* [146, 147].

As previously described, the RAS/RAF/MEK/ERK pathway remains largely intact in BC [113–116]. This is noticeably true in HER2+ BC due to its overreliance on the PI3K/Akt pathway [140]. Despite this strong reliance, RAS/RAF/MEK/ERK plays an important role in drug resistance to HER2 targeting therapies. This was shown to

occur, both *in vitro* and *in vivo*, through a switch to MEK/ERK from PI3K/Akt as the primary driver pathway for tumor progression post-treatment [148]. This switch elicits sensitivity to MEK and ERK inhibitors due to the now strong dependence on the activation of this pathway [148]. Resistance to trastuzumab has also been shown *in vitro* to be acquired through the drug-mediated upregulation and autocrine production of CCL5 and eventual constitutive activation of ERK and NFκB. MEK inhibition and CCR5 antagonism partially reverse this trastuzumab resistance and may offer good therapeutic targets for resensitizing tumors in the case of cancer progression after first-line treatments [149]. Despite playing a smaller role in overall tumor progression compared to the PI3K/Akt pathway, RAS/RAF/MEK/ERK acts as an important mediator of drug resistance in HER2+ BC and therapeutic targeting of this pathway may allow for overcoming resistance to HER2 targeting therapies.

### HER2/RAS/RAF/MEK/ERK targeted therapies

Current FDA-approved RAS/RAF/MEK/ERK-targeted therapies for BC (Table 2) include HER2 antibodies such as trastuzumab, pertuzumab, and margetuximab, as well as small-molecule tyrosine kinase inhibitors (TKIs) like lapatinib, neratinib, and tucatinib [150]. Additionally, antibody-drug conjugates (ADCs) like trastuzumab emtansine (T-DM1) and trastuzumab deruxtecan (T-DXd) combine anti-HER2 antibodies with cytotoxic agents, providing more treatment options [151, 152].

Before the development of HER2-targeted therapies, HER2+ BC had poor clinical outcomes due to hyperproliferative RAS/MAPK and PI3K/Akt activation [121, 124, 153]. The FDA approval of trastuzumab significantly improved survival, with early-stage HER2+ BC seeing a 50% increase in disease-free survival [154]. Trastuzumab not only inhibits ERBB receptor dimerization but also enhances cancer cell clearance through antibody-dependent cytotoxicity [155]. Although trastuzumab is currently considered one of the most effective treatments in oncology, a significant number of patients with HER2-overexpressing BC do not benefit from it, leading to the development of combination therapies. The addition of other monoclonal antibodies (mAbs), such as pertuzumab, to standard anti-HER2 therapy has led to an over 90% three-year invasive disease-free survival rate in HER2+ BC [156]. Trastuzumab and pertuzumab are widely used anti-HER2 therapies that specifically target the extracellular domain of the HER2 receptor, effectively disrupting HER2-driven signaling from the cell surface. In contrast TKIs represent another commonly used class of anti-HER2 agents, which are designed to target the intracellular kinase domain of HER2, inhibiting downstream signaling pathways that contribute to tumor growth and survival.

The development of TKIs has improved outcomes for patients with BC whose tumors develop resistance to anti-HER2 mAbs [157, 158]. These TKIs work by inhibiting the autophosphorylation of tyrosine kinases, even in the presence of ligand binding and receptor dimerization, thereby preventing further activation of the EGFR pathway [159]. In addition to the FDA-approved TKIs lapatinib, neratinib, and tucatinib (Table 2), several other TKIs are currently being investigated in clinical trials. These novel agents aim to further improve outcomes in treatment of BC, particularly in cases of resistance to existing therapies. One novel targeted therapy for HER2+ BC is an irreversible dual pan-HER TKI pyrotinib, whose efficacy and safety are evaluated in early-stage BC and metastatic setting (Table 3). Pyrotinib-containing regimens demonstrated considerable tumor response, disease control, and survival with manageable adverse effects [160].

Another pan-HER kinase inhibitor, neratinib, is under investigation in clinical trials (Table 3), though it has not yet received FDA approval for BC treatment. Combining dual-targeting approaches, like T-DM1 and neratinib—using mAbs to target the extracellular domain and TKIs for the intracellular segment—enhances the therapeutic impact, providing a more comprehensive strategy in managing HER2-positive BC (NCT05388149).

The Bruton's Tyrosine Kinase (BTK) inhibitor ibrutinib has shown significant efficacy in targeting HER family receptors in BC. *In vitro* studies reveal that ibrutinib effectively blocks the activation of EGFR, HER2, HER3, and HER4 [161]. HER2-overexpressing BC cell lines show particular sensitivity to ibrutinib, achieving IC50 values lower than those for lapatinib, indicating enhanced efficacy at lower concentrations. Additionally, ibrutinib has been observed to inhibit cell growth, induce cell-cycle arrest, and initiate caspase-dependent apoptosis in these cell lines [162]. Currently, a phase I/II clinical trial (NCT03379428) is underway to explore the efficacy of ibrutinib in HER2-amplified metastatic BC, potentially broadening treatment options for this subtype (Table 3).

ADCs, like T-DM1 and T-DXd (Table 2), are effective for patients with progressive HER2+ BC following trastuzumab treatment [163]. Numerous ADCs are currently under investigation for BC, with several targeting HER2-positive tumors showing promising preclinical and early clinical outcomes (Table 3).

ARX788 is the next-generation, site-specific anti-HER2 ADC, that is currently studied in BC and other solid tumors. This ADC has shown considerable efficacy in preclinical studies, demonstrating activity in both *in vitro* and *in vivo* models of HER2-positive breast and gastric cancers, including those resistant to T-DM1 [164, 165]. Given the limited therapeutic options for T-DM1-resistant cancers, ARX788 is a promising candidate. The recent trial (NCT04829604) in China demonstrated that ARX788

significantly improves PFS compared to active control in patients with HER2-positive, locally advanced, or metastatic BC (Table 3). These results highlight ARX788's potential to overcome drug resistance in HER2-positive cancers. Additionally, in 2021, the FDA granted ARX788 fast-track designation as a monotherapy for advanced HER2-positive BC in patients previously treated with HER2-targeted therapies, expediting its development as a promising therapeutic option.

IKS014 exemplifies the pursuit of safer and more effective therapies in the class of HER2-targeting ADCs (Table 3). This innovative ADC utilizes novel bioconjugation techniques and a tumor-selective linker to minimize off-target effects, thereby enhancing both safety and efficacy. Preclinical studies have shown that IKS014 demonstrates significant efficacy against HER2-positive tumor xenografts [166]. This approach reflects an ongoing effort to develop safer models with a broader therapeutic index while effectively targeting cancer cells. Another ADC, FS-1502 (Table 3), was well tolerated and demonstrated strong antitumor activity [167].

Alternative drug delivery systems, known as targeted protein degradation (TPD) technologies, have been developed in addition to traditional toxin delivery in ADCs [168]. By combining this conjugate approach with TPD, the field of degrader-antibody conjugate (DAC) has emerged, allowing for targeted protein degradation within cancer-associated cells. An example of this approach is DAC ORM-5029, represented in Table 3 [169].

RAS pathway activation varies among BC subtypes: it is high in basal-like TNBC and HER2-enriched subtypes, while luminal A and B tumors show low activation [170, 171]. TNBC, lacking clear druggable targets, remains a focus for RAS inhibition. Although BRAF alterations occur in 30% of TNBC cases, direct mutations like V600E are rare (2–3%) [117, 172]. Nonetheless, selective cases of BRAF V600E mutant TNBC have shown success with BRAF inhibitors dabrafenib and vemurafenib [173, 174]. However, the clinical relevance of BRAF targeting in BC remains unclear due to the scarcity of these mutations and the lack of specific clinical trials.

MEK inhibitors like trametinib have demonstrated preclinical efficacy, especially in TNBC, although results in ER/PR-positive and HER2-positive lines have been more modest [175]. In a clinical trial (NCT01964924) in patients with TNBC found that eight out of 37 patients in the trametinib arm experienced clinical benefits, highlighting the potential for further studies in larger cohorts to clarify MEK inhibition's role in BC.

In metastatic HER2-positive cancer resistant to anti-HER2 therapies, somatic mutations often activate ERK/MEK signaling through the loss of *NF1*, the GTPase-activating protein that deactivates RAS [148]. This indicates that HER2 therapy-resistant BC may depend on the RAS/RAF/MEK/ERK pathway for survival, providing the rationale for combining anti-HER2 therapy with MEK

inhibition. A variety of MEK inhibitors are currently being evaluated in clinical trials (Table 3).

Conversely, HER2 addiction can be induced through RTK antagonists [176]. Although these antagonists inhibit the RAS/RAF/MEK/ERK pathway, their effect on the PI3K pathway is greater, causing BC cells to increasingly rely on RAS/RAF/MEK/ERK signaling. This suggests that combining HER2 or MEK inhibitors with anti-PI3K therapy could offer a potent therapeutic approach.

For example, the imipridone ONC201, a dopamine receptor D2 inhibitor and allosteric agonist of the mitochondrial protease caseinolytic protease P, demonstrated potent synergy with trametinib in TNBC cell lines [177]. Similarly, bispecific antibodies (BsAb) like zanidatamab (NCT06435429), which target multiple residues of the HER2 receptor, have shown potential in the early phases of clinical trials by reducing mutation-mediated resistance [178].

Therapeutic advancement and improved screening techniques have drastically improved the prognosis for HER2+ BC particularly in the early stages of disease. However, primary and acquired resistance to treatment is not uncommon, especially in metastatic disease, so continued research into overcoming these resistances is warranted [153, 156].

## Limitations of current targeted therapies and strategies to overcome them in BC treatment

Targeted therapies aimed at the RAS/RAF/MEK/ERK and PI3K/Akt pathways have been pivotal in BC treatment, particularly for aggressive subtypes like HER2-positive and TNBC. However, these therapies face several significant limitations. Below are the key challenges and proposed strategies to overcome them [179].

**Therapeutic Resistance:** One major limitation is the development of resistance to inhibitors of the RAS/RAF/MEK/ERK and PI3K/Akt pathways, limiting the long-term efficacy of TT. Tumor cells often develop mutations in downstream signaling proteins or activate alternative pathways to bypass the effects of these inhibitors. For example, mutations in the KRAS gene or amplification of PIK3CA can result in resistance to MEK or PI3K inhibitors [180].

Combining TT, such as PI3K inhibitors with CDK4/6 inhibitors, has shown promise in overcoming resistance, especially in ER-positive BC [181] (see Table 3, NCT05508906, NCT05768139). Additionally, the combination of PI3K inhibitors with anti-HER2 therapy has demonstrated potential in enhancing efficacy in HER2-positive BC (see Table 3, NCT03765983).

**Compensatory Pathway Activation:** When one pathway is inhibited, tumors can activate compensatory survival pathways (Figure 1). For instance, blocking the PI3K/Akt pathway can lead to activation of the RAS/RAF/MEK/ERK pathway and vice versa [176, 182,

183]. Combination therapies targeting both pathways simultaneously, such as dual inhibition of PI3K/mTOR and MEK/ERK (NCT01160718, NCT01390818), have been proposed to suppress feedback activation [184, 185].

**Tumor Heterogeneity:** Intratumor heterogeneity, where different subpopulations of cancer cells respond differently to therapies, is a significant challenge in BC. Subclones of tumor cells can harbor mutations that confer resistance to PI3K/Akt or MEK inhibitors [186]. Liquid biopsies, which allow real-time monitoring of tumor evolution, are being explored to track resistance mutations (NCT05625087, NCT03881384, NCT05601440). Additionally, adaptive therapy approaches are being used to modulate treatment dosing based on tumor heterogeneity [187].

**Toxicity and Side Effects:** TT can cause to significant side effects. For instance, PI3K inhibitors like alpelisib are associated with hyperglycemia, while MEK inhibitors can cause ocular toxicities [96, 188].

Preclinical studies in mouse models indicate that PI3K $\alpha$  inhibition reduces glucose uptake in insulin-responsive tissues such as adipose tissue and muscle, resulting in hyperglycemia and compensatory insulin release from the pancreas, which diminishes the effect of PI3K inhibition [189].

Selecting patients based on biomarkers, such as PIK3CA mutations, can help minimize unnecessary toxicity (ComboMATCH Screening Trial, NCT05564377). Additionally, exploring intermittent dosing schedules may manage these toxicities without reducing efficacy [181]. Optimizing dosing regimens, developing more selective inhibitors, and enhancing drug delivery systems are also essential for reducing adverse effects.

**Limited Efficacy in Metastatic BC:** In metastatic disease therapies targeting the PI3K/Akt and RAS/RAF/MEK/ERK pathways often show limited efficacy. This is especially true in TNBC, where resistance mechanisms frequently emerge [184]. Combining TT with immunotherapies, such as immune checkpoint inhibitors, is a promising strategy. Research suggests that PI3K inhibitors can modulate the tumor immune microenvironment, enhancing the effectiveness of immunotherapy [190, 191].

**Lack of Predictive Biomarkers:** The absence of reliable biomarkers poses a challenge in predicting which patients will respond to therapies targeting the RAS/RAF/MEK/ERK and PI3K/Akt pathways [192]. Ongoing research in genomic profiling and personalized medicine aims to identify biomarkers - such as PIK3CA mutations, PTEN loss, and KRAS/NRAS mutations - to guide therapy selection (NCT05652569, CATCH-GUIDE trial; NCT05564377, ComboMATCH Screening Trial; NCT06625775) [186, 193].

**Tumor Microenvironment (TME) Resistance:** TME, including stromal and immune cells, can contribute to resistance by providing growth factors that bypass inhibited pathways [194–198]. Strategies targeting the TME, such

as inhibitors of cancer-associated fibroblasts (CAFs) and immune-modulatory therapies, are currently under investigation [199–202]. Combination therapies targeting both the PI3K pathway and the immune microenvironment have shown potential in clinical trials [203, 204].

**Conclusion:** While targeted therapies for the RAS/RAF/MEK/ERK and PI3K/Akt pathways have advanced BC treatment, addressing challenges such as resistance, toxicity, and tumor heterogeneity is critical. Promising approaches include combination therapies, biomarker-driven patient selection, and targeting the TME.

## WNT/ $\beta$ -CATENIN PATHWAY

### Biological significance in cancer

The Wnt/ $\beta$ -catenin pathway, also known as the canonical Wnt pathway, plays a crucial role in BC development and metastasis [205, 206]. Wnt/ $\beta$ -catenin signaling is initiated by the binding of extracellular Wnt ligands to Frizzled (FZD) or LRP5/6 transmembrane receptors, which leads to the downstream phosphorylation and nuclear localization of  $\beta$ -catenin [207, 208].  $\beta$ -catenin mediates the activation of TCF/LEF family transcription factors, causing the transcription of Wnt/ $\beta$ -catenin pathway target genes [209]. In the absence of Wnt ligand binding,  $\beta$ -catenin is hyperphosphorylated by the destruction complex, comprised of Axin, APC, GSK-3 $\beta$ , and CK1 $\alpha$ , leading to its degradation (Figure 1). While controlled regulation of Wnt signaling supports the development of healthy breast tissue, aberrant activation of the Wnt/ $\beta$ -catenin pathway has been described in BC, particularly TNBC, and confers a worse prognosis [210–213]. There are also multiple documented “non-canonical” Wnt pathways relevant to BC, including the Wnt-planar cell polarity (PCP) and Wnt-Ca<sup>2+</sup>, which lead to distinct transcriptional alterations in the cell [208].

The specific mechanisms by which this signaling axis confers cancer aggressiveness are multifaceted. For one,  $\beta$ -catenin can increase the expression of the oncogenic transcription factor c-Myc and the cell-cycle protein Cyclin D1 [214–216]. Conversely, c-Myc has been demonstrated to increase Wnt pathway signaling, suggesting positive feedback [217]. Further,  $\beta$ -catenin plays a role in the epithelial-to-mesenchymal transition (EMT), which confers migratory and metastatic potential to tumor cells. Studies have demonstrated a direct connection between Wnt/ $\beta$ -catenin signaling and the EMT, in which Wnt activation can decrease E-cadherin levels by upregulating its transcriptional repressor, Slug [218]. One study in mice found a causal link to metastasis, with loss of p53 causing increased neutrophilic inflammation systemically, expediting BC metastasis [219]. The Wnt/ $\beta$ -catenin pathway is additionally theorized to maintain cancer stem cell (CSC) populations, though its specific function in this aspect of BC is still being investigated [213, 220, 221].

$\beta$ -catenin also plays complex roles in apoptosis, demonstrating differential effects with extrinsic and intrinsic apoptotic signals. On one hand,  $\beta$ -catenin signaling correlates with upregulation of the anti-apoptotic protein Bcl-2; on the other hand,  $\beta$ -catenin signaling increases sensitivity to extrinsic apoptosis by TRAIL and Fas-mediated pathways [222]. Wnt signaling has also been shown to promote the expression of anti-apoptotic markers such as survivin, supporting the survival of Wnt-addicted cancer cells [223, 224].

### Emerging therapeutic targets

Numerous strategies have been proposed to interfere with Wnt signaling and its components. One approach is targeting enzymes involved in producing or modifying Wnt ligands, including the acetyltransferase PORCN [225]. Other strategies include preventing extracellular Wnt binding by targeting FZD receptors or LRP/FZD complexes, or by sequestering Wnt ligands with decoy receptors [226, 227]. A third approach to inhibiting  $\beta$ -catenin signaling is enhancing the activity of the destruction complex. Molecules stabilizing a number of the destruction complex's components, including Axin and CK1 $\alpha$  have shown the preclinical potential to attenuate Wnt/ $\beta$ -catenin signaling [228, 229].

### Preclinical and clinical developments

To date, the success of Wnt inhibitors has widely been limited to preclinical experiments [230]. Clinical trials using Wnt-inhibiting compounds are limited in BC and, in other tumor types, often report severe toxicities and varied efficacies. A phase I clinical trial (NCT01351103) of the PORCN inhibitor LGK974 did not report any complete or partial responses [231]. A phase Ib trial of the FZD mAb vantictumab combined with paclitaxel in metastatic BC reported a 30.8% response rate for patients with TNBC but high incidence of bone fracture, limiting the future clinical relevance of the compound [232]. A phase I trial of the fusion protein ipafricept, which sequesters Wnt ligands, found tolerable doses but reported no complete or partial responses [233].

Targeting the Wnt pathway in cancer represents an attractive therapeutic approach. Several clinical trials are currently evaluating both canonical and non-canonical Wnt-targeting therapies in solid tumors [234]. For example, the small-molecule inhibitor PRI-724, which disrupts the interaction between  $\beta$ -catenin and its coactivator CREB [235], has shown good tolerance in patients with solid tumors [236]. Another potential target is tankyrase, which promotes the degradation of Axin [237]. Although tankyrase-specific inhibitors have shown promise in preclinical studies, they have not yet reached

clinical trials [238–241]. The success of these trials in developing safe, effective treatments and identifying responsive patients will shape the future of Wnt-targeting therapies in BC care.

## NOTCH SIGNALING

### Biological significance in BC

The Notch signaling pathway, highly conserved across species, is upregulated in BC and linked to poor outcomes, especially in TNBC [242–244]. Notch signaling is triggered when a Notch receptor binds to a ligand (DLL or Jagged) on an adjacent cell [245]. This interaction leads to cleavage of the receptor by ADAM proteases, followed by further cleavage by  $\gamma$ -secretase (Figure 1), releasing the Notch intracellular domain (NICD). The NICD then translocates to the nucleus to regulate transcriptional targets like the HES and HEY protein families [245–247].

Overactive Notch signaling in BC influences cell proliferation and stemness. It regulates Cyclin D1 expression and may help maintain tumor stem cells, as evidenced by its promotion of mammosphere formation *in vitro* [248–251]. While Notch enhances Myc transcription in some cancers, direct evidence for this relationship in BC is still unclear [252].

In BC, Notch pathway aberrations often result in NICD accumulation [253]. Loss of negative regulators like Numb and GIT1, especially in ER-negative subtypes, along with FBXW7, is linked to poor outcomes [254–256]. Activating mutations and amplifications of *NOTCH* genes, more common in TNBC, further elevate Notch signaling [257].

### Preclinical and clinical advances in therapeutic strategies for BC

Studies have demonstrated a complex crosstalk between Notch and estrogen signaling in ER $\alpha$ -positive BC [258, 259]. Various therapeutic approaches are being developed to disrupt Notch signaling in BC [260].  $\gamma$ -Secretase inhibitors block signal transduction following Notch ligand-receptor binding, but the safety of long-term treatment in combination with ET has not been thoroughly investigated [261, 262]. Monoclonal antibodies-targeting specific ligands and receptors, like Notch1 or DLL4, aim for greater tumor specificity [263, 264]. Another strategy involves drugs that disrupt the NICD transcriptional complex [265]. While  $\gamma$ -secretase inhibitors and Notch-targeting monoclonal antibodies have shown some success in reducing cancer stem cell populations in clinical trials, their widespread use is limited by toxicity [266, 267]. Developing better-tolerated therapies will be crucial to effectively targeting Notch in the clinic.

## DNA DAMAGE RESPONSE MECHANISMS IN BREAST CANCER

The DNA damage response (DDR) system is essential for preventing genomic instability, with impaired DNA repair increasing cancer risk. DNA repair pathways, critical for maintaining genomic integrity, counteract continuous DNA damage from both endogenous factors (e.g., oxidative stress, replication errors) and exogenous sources (e.g., radiation, chemotherapy). In BC cells, activating these repair mechanisms is crucial for addressing damage and maintaining genomic stability [268–270]. Key mechanisms include nucleotide excision repair (NER), base excision repair (BER), and non-homologous end joining (NHEJ) pathway, the homologous recombination (HR) pathway, double-strand break repair (Figure 1), which collectively mitigate mutations and prevent genomic instability [271, 272].

### NER pathway

The NER pathway repairs DNA damage from UV exposure and chemotherapy. NER consists of two major pathways: Global Genome NER, which scans the entire genome, and Transcription-Coupled NER, which targets damage during transcription. Both pathways involve key proteins like xeroderma pigmentosum group G (XPG) and excision repair cross-complementation group 1 (ERCC1). Dysregulation of these proteins can result in cancer, particularly BC. A study of BC patients identified three gene polymorphism linked to BC - *ERCC1* rs11615, *XPC* rs2228000, and *ERCC2/XPD* rs50872 [273, 274].

### BER pathway

The BER pathway addresses DNA damage caused by oxidative stress, UV radiation, and alkylating agents, which are common front-line components of cancer chemotherapy [269, 275, 276]. BER repairs small base lesions by removing damaged bases, cutting the DNA backbone, and replacing the nucleotides. Enzymes such as DNA glycosylases identify and excise damaged DNA, which is then repaired through either short or long patch mechanisms [277]. During this repair, X-Ray repair cross-complementing protein 1 (XRCC1) and poly (ADP-ribose) polymerase 1 (PARP-1) play a role in recruiting additional repair factors to facilitate the restoration of DNA integrity. Single nucleotide polymorphisms (SNPs) in BER genes, such as XRCC1 and PARP-1, have been linked to higher likelihood of developing BC [278–281].

### NHEJ pathway

NHEJ pathway repairs double-strand breaks in DNA. This repair mechanism involves several key components, including Ku70/80 heterodimer, X-Ray

repair cross-complementing protein 4 (XRCC4), DNA-dependent protein kinases (DNA-PKs), the XRCC4-like factor (XLF) complex, and DNA ligase IV. SNPs in XRCC4 and Ku70 have been associated with an increased risk of BC [274, 282].

### HR pathway

BRCA1 and BRCA2 genes are essential to the HR pathway, a critical mechanism for repairing DNA double-strand breaks (DSBs). The proteins encoded by these genes form complexes with other proteins and enzymes to facilitate HR repair [283, 284]. BRCA2 is crucial for recruiting RAD51 to DNA DSBs, aiding repair. Mutations in BRCA1/2 disrupt this process, raising cancer risk [285].

TNBC, particularly the basal-like subtype, is associated with a higher incidence of BRCA1 mutations and defects in DNA repair pathways [283, 286]. While BRCA2 mutations are more commonly linked to ER-positive, and HER2-negative BCs [287, 288].

The ATM-Chk2 and ATR-Chk1 pathways play a key role in responding to DNA damage. ATM is activated by DSBs, leading to Chk2 activation, while ATR responds to SSBs and activates Chk1. ATM also helps initiate ATR activity to repair DSBs through HR, the primary mechanism for fixing DSBs and restarting stalled replication forks. HR-proficient cells can withstand PARP inhibition by repairing damage through HR. Inhibiting PARP1 leads to the buildup of DNA damage normally repaired by BER. Notably, depletion of key DNA damage proteins, including ATM, Chk1, Chk2, and p53, can bypass oncogene-induced senescence, promoting cell proliferation and transformation in oncogene-expressing cells [289].

The ATM-Chk2-p53 pathway may contribute to BC development. A large study of nearly 113,000 women, including over 60,000 patients with BC, identified gene alterations in ATM, BRCA1, BRCA2, PALB2, *BARD1*, *RAD51C*, *RAD51D*, Chk2, and TP53 as significant risk factors for BC. ATM and Chk2 alterations were particularly associated with ER/PR-positive BC [290–293]. Additionally, a study of 289 male BC patients found that elevated pATR expression, either alone or in combination with pChk2 and pATM, was linked to poorer survival outcomes [294].

### Therapeutic strategies targeting DDR

Recent advances have introduced several drugs targeting DDR pathways for BC treatment (Table 2). Olaparib, the first FDA-approved inhibitor of poly(ADP-ribose)-polymerase (PARP), was initially used for BRCA-deficient ovarian cancer and later approved for HER2-negative BC with BRCA1/2 mutations. PARP inhibitors, including talazoparib and olaparib, are effective



for cancers with homologous recombination repair deficiencies [292, 295–298].

New PARP1-selective inhibitors like NMS-03305293 AZD5305 and AZD9574 aim to reduce side effects and show promise in preclinical studies. Other DDR inhibitors targeting ATM ATR and Chk1 have also shown effectiveness either alone or combined with PARP inhibitors [296, 299].

Developing resistance to PARP inhibitors is a significant obstacle in cancer treatment. Various mechanisms contribute to this resistance, including increased drug efflux, pathway dysregulation, restoration of the replication fork, and reverse mutations [269]. To overcome these challenges and improve the efficacy of PARP inhibitors, combination therapies with chemotherapies, immunotherapies, and other DNA damage response inhibitors have been investigated in clinical settings [300].

## EMERGING THERAPIES AND FUTURE PERSPECTIVES FOR THE TREATMENT OF BC

The landscape of BC treatment continues to evolve with the development of emerging therapies and innovative approaches, which mainly focused on overcoming resistance, improving precision in targeting tumors, and enhancing the immune response to cancer.

Targeted therapies, immunotherapies, and novel drug delivery systems are transforming BC care, particularly for aggressive subtypes like HER2-positive and TNBC.

ADCs represent a new horizon in treating various tumors, including BC, by selectively delivering cytotoxic agents directly to cancer cells while minimizing off-target effects. This approach enhances the therapeutic index and allows for targeted destruction of cancer cells with greater precision. Extensive development of ADCs targeting HER2, HER3, and TROP2 has shown significant promise in preclinical and clinical studies (Tables 2, 3).

An innovative therapeutic approach to overcoming cancer resistance combines protein degradation with the specificity of ADCs [301, 302]. By attaching protein degraders to antibodies, degrader-antibody conjugates (DACs) direct these degraders specifically to cancer cells, enabling the selective removal of proteins that drive cancer progression. This targeted strategy holds significant promise for enhancing treatment efficacy and reducing resistance across various cancers (Table 3, NCT05511844).

BsAbs are an emerging class of drugs in BC research [303, 304]. BsAbs are designed to recognize two specific antigens: one on the surface of tumor cells (such as HER2) and another on immune cells (such as CD47) [305]. By binding to two distinct targets, BsAbs can perform dual actions and may be more effective than traditional mAbs. Notably, the BsAb CD47/HER2 has shown promise in

treating HER2+ mBC [305]. This BsAb enhances the anti-tumor immune response by targeting cancer cells and simultaneously engaging the immune system. Several BsAbs are currently being evaluated in clinical trials for mBC (see Table 3, section BsAb). BsAbs zanidatamab has demonstrated promising anti-tumor activity in HER2-positive cancers, with the potential to overcome resistance mechanisms [306].

Recent research has explored the potential of experimental vaccines against BC, demonstrating their ability to generate a robust immune response targeting key tumor proteins [307]. The concept behind cancer vaccines is to harness the autologous immune system to recognize and combat cancer cells effectively.

BC vaccines deliver antigens (Table 3), such as HER2 or related peptides derived from tumor-associated proteins, through various strategies [308]. Additionally, combining cancer vaccines with established therapies may enhance their efficacy [309, 310]. The FDA has not yet approved any vaccines to treat BC.

Another emerging therapeutic target is the DDR pathways. Targeting DDR pathways is gaining traction, particularly for cancers with deficient repair mechanisms, such as those harboring BRCA mutations. PARP inhibitors such as olaparib and talazoparib are effective in BRCA1/2-mutated BC and combining them with other therapies may improve outcomes [298].

PARP-1 is a crucial protein involved in maintaining genomic stability. As a nuclear protein, it serves as the key enzyme responsible for repairing damaged DNA [311]. Saruparib, which selectively targets PARP1 and is being evaluated in ongoing trials (NCT06380751, NCT04644068), has demonstrated superior tolerability and enhanced target engagement in preclinical and clinical studies compared to currently approved PARP inhibitors [312]. Another highly selective PARP1 inhibitor, HRS-1167 (M9466), in the ongoing trial NCT06516289 (Table 3), has demonstrated promising anti-tumor activity in pretreated patients with HRR mutations [313]. ATR and ATM inhibitors (NCT05986071) are also being studied to increase tumor sensitivity to DNA-damaging agents [314].

Epigenetic therapies targeting aberrant DNA methylation and histone modifications are under exploration in the ongoing trial NCT05633914 (Table 3), aiming to reverse changes that drive tumor progression and resistance [315–317].

Lastly but not least, theranostics and molecular imaging are emerging as tools for delivering targeted therapy while simultaneously enabling real-time monitoring of treatment efficacy [318, 319].

These innovations collectively represent significant advances in BC treatment, offering the potential for more personalized, effective, and durable therapeutic strategies.

Continued research into the intricate interactions between these pathways is crucial for the development of more effective targeted combination therapies. Innovations in

therapeutic strategies, coupled with a deeper understanding of breast cancer biology, will be essential for advancing personalized medicine and improving clinical outcomes.

## Data availability statement

Data are contained within the article.

## AUTHOR CONTRIBUTIONS

Conceptualization and methodology, WED, AS, and DR; writing - original draft preparation, DR, AS, WM, CP, TR, NV, MG and MT; figure conceptualization and creation, WED, AS, MT, DR, and MG; review and editing, WED, DR, AS, WM, CP, TR, MT, MG, and SLG, supervision – WED, AS, MT, and SLG. All authors have read and agreed to the published version of the manuscript.

## ACKNOWLEDGMENTS

WED is an American Cancer Society Research Professor and is supported by the Menco Family University Professorship at Brown University. This research was funded in part by Grant 007013-001 from the Warren Alpert Foundation, Grant 008284-001 from Actuate Therapeutics, and Grant 009353-002 from Rhode Island Hospital.

## CONFLICTS OF INTEREST

WED is the scientific founder and shareholder of Oncoceutics Inc. (acquired by Chimerix), p53-Therapeutics Inc., and SMURF-Therapeutics Inc.

El-Deiry has disclosed his relationship with Oncoceutics/Chimerix and potential conflict of interest to his academic institution/employer and is fully compliant with the NIH and the institutional policy that is managing this potential conflict of interest.

## FUNDING

We appreciate the support of the Legorreta Cancer Center at Brown University and their role in cultivating a dynamic and engaging research environment.

## REFERENCES

1. Siegel RL, Miller KD, Wagle NS, Jemal A. Cancer statistics, 2023. *CA Cancer J Clin.* 2023; 73:17–48. <https://doi.org/10.3322/caac.21763>. [PubMed]
2. Sung H, Ferlay J, Siegel RL, Laversanne M, Soerjomataram I, Jemal A, Bray F. Global Cancer Statistics 2020: GLOBOCAN Estimates of Incidence and Mortality Worldwide for 36 Cancers in 185 Countries. *CA Cancer J Clin.* 2021; 71:209–49. <https://doi.org/10.3322/caac.21660>. [PubMed]
3. Bray F, Laversanne M, Sung H, Ferlay J, Siegel RL, Soerjomataram I, Jemal A. Global cancer statistics 2022: GLOBOCAN estimates of incidence and mortality worldwide for 36 cancers in 185 countries. *CA Cancer J Clin.* 2024; 74:229–63. <https://doi.org/10.3322/caac.21834>. [PubMed]
4. Cardoso F, Kyriakides S, Ohno S, Penault-Llorca F, Poortmans P, Rubio IT, Zackrisson S, Senkus E, and ESMO Guidelines Committee. Electronic address: [clinicalguidelines@esmo.org](mailto:clinicalguidelines@esmo.org). Early breast cancer: ESMO Clinical Practice Guidelines for diagnosis, treatment and follow-up†. *Ann Oncol.* 2019; 30:1194–20. <https://doi.org/10.1093/annonc/mdz173>. [PubMed]
5. Rej RK, Roy J, Allu SR. Therapies for the Treatment of Advanced/Metastatic Estrogen Receptor-Positive Breast Cancer: Current Situation and Future Directions. *Cancers (Basel).* 2024; 16:552. <https://doi.org/10.3390/cancers16030552>. [PubMed]
6. Wang J, Wu SG. Breast Cancer: An Overview of Current Therapeutic Strategies, Challenge, and Perspectives. *Breast Cancer (Dove Med Press).* 2023; 15:721–30. <https://doi.org/10.2147/BCTT.S432526>. [PubMed]
7. Charo LM, Eskander RN, Sicklick J, Kim KH, Lim HJ, Okamura R, Lee S, Subramanian R, Schwab R, Shatsky R, Plaxe S, Kato S, Kurzrock R. Real-World Data From a Molecular Tumor Board: Improved Outcomes in Breast and Gynecologic Cancers Patients With Precision Medicine. *JCO Precis Oncol.* 2022; 6:e2000508. <https://doi.org/10.1200/PO.20.00508>. [PubMed]
8. Sicklick JK, Kato S, Okamura R, Schwaederle M, Hahn ME, Williams CB, De P, Krie A, Piccioni DE, Miller VA, Ross JS, Benson A, Webster J, et al. Molecular profiling of cancer patients enables personalized combination therapy: the I-PREDICT study. *Nat Med.* 2019; 25:744–50. <https://doi.org/10.1038/s41591-019-0407-5>. [PubMed]
9. Bou Antoun N, Chioni AM. Dysregulated Signalling Pathways Driving Anticancer Drug Resistance. *Int J Mol Sci.* 2023; 24:12222. <https://doi.org/10.3390/ijms241512222>. [PubMed]
10. Yip HYK, Papa A. Signaling Pathways in Cancer: Therapeutic Targets, Combinatorial Treatments, and New Developments. *Cells.* 2021; 10:659. <https://doi.org/10.3390/cells10030659>. [PubMed]
11. Nisar S, Hashem S, Macha MA, Yadav SK, Muralitharan S, Therachiyil L, Sageena G, Al-Naemi H, Haris M, Bhat AA. Exploring Dysregulated Signaling Pathways in Cancer. *Curr Pharm Des.* 2020; 26:429–45. <https://doi.org/10.2174/1381612826666200115095937>. [PubMed]
12. Fresno Vara JA, Casado E, de Castro J, Cejas P, Belda-Iniesta C, González-Barón M. PI3K/Akt signalling pathway and cancer. *Cancer Treat Rev.* 2004; 30:193–204. <https://doi.org/10.1016/j.ctrv.2003.07.007>. [PubMed]

13. Lien EC, Dibble CC, Toker A. PI3K signaling in cancer: beyond AKT. *Curr Opin Cell Biol.* 2017; 45:62–71. <https://doi.org/10.1016/j.ceb.2017.02.007>. [PubMed]
14. Manning BD, Toker A. AKT/PKB Signaling: Navigating the Network. *Cell.* 2017; 169:381–405. <https://doi.org/10.1016/j.cell.2017.04.001>. [PubMed]
15. Bachman KE, Argani P, Samuels Y, Silliman N, Ptak J, Szabo S, Konishi H, Karakas B, Blair BG, Lin C, Peters BA, Velculescu VE, Park BH. The PIK3CA gene is mutated with high frequency in human breast cancers. *Cancer Biol Ther.* 2004; 3:772–75. <https://doi.org/10.4161/cbt.3.8.994>. [PubMed]
16. Hutchinson KE, Chen JW, Savage HM, Stout TJ, Schimmoller F, Cortés J, Dent S, Harbeck N, Jacot W, Krop I, Trabucco SE, Sivakumar S, Sokol ES, Wilson TR. Multiple PIK3CA mutation clonality correlates with outcomes in tasisib + fulvestrant-treated ER+/HER2-, PIK3CA-mutated breast cancers. *Genome Med.* 2023; 15:28. <https://doi.org/10.1186/s13073-023-01181-8>. [PubMed]
17. Miricescu D, Balan DG, Tulin A, Stiru O, Vacarioiu IA, Mihai DA, Popa CC, Papacocea RI, Enyedi M, Sorin NA, Vatachki G, Georgescu DE, Nica AE, Stefani C. PI3K/AKT/mTOR signalling pathway involvement in renal cell carcinoma pathogenesis (Review). *Exp Ther Med.* 2021; 21:540. <https://doi.org/10.3892/etm.2021.9972>. [PubMed]
18. Dent S, Cortés J, Im YH, Diéras V, Harbeck N, Krop IE, Wilson TR, Cui N, Schimmoller F, Hsu JY, He J, De Laurentiis M, Sousa S, et al. Phase III randomized study of tasisib or placebo with fulvestrant in estrogen receptor-positive, PIK3CA-mutant, HER2-negative, advanced breast cancer: the SANDPIPER trial. *Ann Oncol.* 2021; 32:197–207. <https://doi.org/10.1016/j.annonc.2020.10.596>. [PubMed]
19. Isakoff SJ, Engelman JA, Irie HY, Luo J, Brachmann SM, Pearline RV, Cantley LC, Brugge JS. Breast cancer-associated PIK3CA mutations are oncogenic in mammary epithelial cells. *Cancer Res.* 2005; 65:10992–1000. <https://doi.org/10.1158/0008-5472.CAN-05-2612>. [PubMed]
20. Reinhardt K, Stückerath K, Hartung C, Kaufhold S, Uleer C, Hanf V, Lantzsich T, Peschel S, John J, Pöhler M, Bauer M, Bürrig FK, Weigert E, et al. PIK3CA-mutations in breast cancer. *Breast Cancer Res Treat.* 2022; 196:483–93. <https://doi.org/10.1007/s10549-022-06637-w>. [PubMed]
21. Zardavas D, Te Marvelde L, Milne RL, Fumagalli D, Fountzilias G, Kotoula V, Razis E, Papaxoinis G, Joensuu H, Moynahan ME, Hennessy BT, Bieche I, Saal LH, et al. Tumor PIK3CA Genotype and Prognosis in Early-Stage Breast Cancer: A Pooled Analysis of Individual Patient Data. *J Clin Oncol.* 2018; 36:981–90. <https://doi.org/10.1200/JCO.2017.74.8301>. [PubMed]
22. Miller TW, Balko JM, Arteaga CL. Phosphatidylinositol 3-kinase and antiestrogen resistance in breast cancer. *J Clin Oncol.* 2011; 29:4452–61. <https://doi.org/10.1200/JCO.2010.34.4879>. [PubMed]
23. Schagerholm C, Robertson S, Toosi H, Sifakis EG, Hartman J. PIK3CA mutations in endocrine-resistant breast cancer. *Sci Rep.* 2024; 14:12542. <https://doi.org/10.1038/s41598-024-62664-1>. [PubMed]
24. Álvarez-García V, Tawil Y, Wise HM, Leslie NR. Mechanisms of PTEN loss in cancer: It's all about diversity. *Semin Cancer Biol.* 2019; 59:66–79. <https://doi.org/10.1016/j.semcancer.2019.02.001>. [PubMed]
25. Song MS, Salmena L, Pandolfi PP. The functions and regulation of the PTEN tumour suppressor. *Nat Rev Mol Cell Biol.* 2012; 13:283–96. <https://doi.org/10.1038/nrm3330>. [PubMed]
26. Bermúdez Brito M, Goulielmaki E, Papakonstanti EA. Focus on PTEN Regulation. *Front Oncol.* 2015; 5:166. <https://doi.org/10.3389/fonc.2015.00166>. [PubMed]
27. Stambolic V, MacPherson D, Sas D, Lin Y, Snow B, Jang Y, Benchimol S, Mak TW. Regulation of PTEN transcription by p53. *Mol Cell.* 2001; 8:317–25. [https://doi.org/10.1016/s1097-2765\(01\)00323-9](https://doi.org/10.1016/s1097-2765(01)00323-9). [PubMed]
28. Naderali E, Khaki AA, Rad JS, Ali-Hemmati A, Rahmati M, Charoudeh HN. Regulation and modulation of PTEN activity. *Mol Biol Rep.* 2018; 45:2869–81. <https://doi.org/10.1007/s11033-018-4321-6>. [PubMed]
29. Chow JY, Ban M, Wu HL, Nguyen F, Huang M, Chung H, Dong H, Carethers JM. TGF-beta downregulates PTEN via activation of NF-kappaB in pancreatic cancer cells. *Am J Physiol Gastrointest Liver Physiol.* 2010; 298:G275–82. <https://doi.org/10.1152/ajpgi.00344.2009>. [PubMed]
30. Yang Y, Zhou F, Fang Z, Wang L, Li Z, Sun L, Wang C, Yao W, Cai X, Jin J, Zha X. Post-transcriptional and post-translational regulation of PTEN by transforming growth factor-beta1. *J Cell Biochem.* 2009; 106:1102–12. <https://doi.org/10.1002/jcb.22100>. [PubMed]
31. Li W, Zhang T, Guo L, Huang L. Regulation of PTEN expression by noncoding RNAs. *J Exp Clin Cancer Res.* 2018; 37:223. <https://doi.org/10.1186/s13046-018-0898-9>. [PubMed]
32. Ho J, Bassi C, Stambolic V. Characterization of nuclear PTEN and its post translational modifications. *Methods.* 2015; 77-78:104–11. <https://doi.org/10.1016/j.ymeth.2015.01.006>. [PubMed]
33. Smith IN, Dawson JE, Krieger J, Thacker S, Bahar I, Eng C. Structural and Dynamic Effects of PTEN C-Terminal Tail Phosphorylation. *J Chem Inf Model.* 2022; 62:4175–90. <https://doi.org/10.1021/acs.jcim.2c00441>. [PubMed]
34. Vazquez F, Ramaswamy S, Nakamura N, Sellers WR. Phosphorylation of the PTEN tail regulates protein stability and function. *Mol Cell Biol.* 2000; 20:5010–18. <https://doi.org/10.1128/MCB.20.14.5010-5018.2000>. [PubMed]
35. Kou XX, Hao T, Meng Z, Zhou YH, Gan YH. Acetylated Sp1 inhibits PTEN expression through binding to PTEN core promoter and recruitment of HDAC1 and promotes cancer cell migration and invasion. *Carcinogenesis.* 2013; 34:58–67. <https://doi.org/10.1093/carcin/bgs336>. [PubMed]

36. Okumura K, Mendoza M, Bachoo RM, DePinho RA, Cavenee WK, Furnari FB. PCAF modulates PTEN activity. *J Biol Chem*. 2006; 281:26562–68. <https://doi.org/10.1074/jbc.M605391200>. [PubMed]
37. Iwase R, Dempsey DR, Whedon SD, Jiang H, Palanski BA, Deng B, Cole PA. Semisynthetic Approach to the Analysis of Tumor Suppressor PTEN Ubiquitination. *J Am Chem Soc*. 2023; 145:6039–44. <https://doi.org/10.1021/jacs.2c13871>. [PubMed]
38. Trotman LC, Wang X, Alimonti A, Chen Z, Teruya-Feldstein J, Yang H, Pavletich NP, Carver BS, Cordon-Cardo C, Erdjument-Bromage H, Tempst P, Chi SG, Kim HJ, et al. Ubiquitination regulates PTEN nuclear import and tumor suppression. *Cell*. 2007; 128:141–56. <https://doi.org/10.1016/j.cell.2006.11.040>. [PubMed]
39. González-García A, Garrido A, Carrera AC. Targeting PTEN Regulation by Post Translational Modifications. *Cancers (Basel)*. 2022; 14:5613. <https://doi.org/10.3390/cancers14225613>. [PubMed]
40. Chai C, Wu HH, Abuetaab Y, Sergi C, Leng R. Regulation of the tumor suppressor PTEN in triple-negative breast cancer. *Cancer Lett*. 2022; 527:41–48. <https://doi.org/10.1016/j.canlet.2021.12.003>. [PubMed]
41. Gao X, Qin T, Mao J, Zhang J, Fan S, Lu Y, Sun Z, Zhang Q, Song B, Li L. PTENP1/miR-20a/PTEN axis contributes to breast cancer progression by regulating PTEN via PI3K/AKT pathway. *J Exp Clin Cancer Res*. 2019; 38:256. <https://doi.org/10.1186/s13046-019-1260-6>. [PubMed]
42. M JR, S V. BMI1 and PTEN are key determinants of breast cancer therapy: A plausible therapeutic target in breast cancer. *Gene*. 2018; 678:302–11. <https://doi.org/10.1016/j.gene.2018.08.022>. [PubMed]
43. Wang J, Zhang S, Zhang J, Zhang Z, Ma Q, Fu W, Chen X, Zhao D, Zhao M, Di C, Xie X. A novel PTEN mutant caused by polymorphism in cis-regulatory elements is involved in chemosensitivity in breast cancer. *Am J Cancer Res*. 2023; 13:86–104. [PubMed]
44. Zhang HY, Liang F, Jia ZL, Song ST, Jiang ZF. *PTEN* mutation, methylation and expression in breast cancer patients. *Oncol Lett*. 2013; 6:161–68. <https://doi.org/10.3892/ol.2013.1331>. [PubMed]
45. Zhang J, Zhang Y, Lin X, Han X, Meredith KL, Li Z. The effects of the tumor suppressor gene *PTEN* on the proliferation and apoptosis of breast cancer cells via AKT phosphorylation. *Transl Cancer Res*. 2023; 12:1863–72. <https://doi.org/10.21037/tcr-23-826>. [PubMed]
46. Ertay A, Liu H, Liu D, Peng P, Hill C, Xiong H, Hancock D, Yuan X, Przewlaka MR, Coldwell M, Howell M, Skipp P, Ewing RM, et al. WDHD1 is essential for the survival of PTEN-inactive triple-negative breast cancer. *Cell Death Dis*. 2020; 11:1001. <https://doi.org/10.1038/s41419-020-03210-5>. [PubMed]
47. Lazaridis G, Kotoula V, Vrettou E, Kostopoulos I, Manousou K, Papadopoulou K, Giannoulata E, Bobos M, Sotiropoulou M, Pentheroudakis G, Efstratiou I, Papoudou-Bai A, Psyrris A, et al. Opposite Prognostic Impact of Single PTEN-loss and *PIK3CA* Mutations in Early High-risk Breast Cancer. *Cancer Genomics Proteomics*. 2019; 16:195–206. <https://doi.org/10.21873/cgp.20125>. [PubMed]
48. Li S, Shen Y, Wang M, Yang J, Lv M, Li P, Chen Z, Yang J. Loss of PTEN expression in breast cancer: association with clinicopathological characteristics and prognosis. *Oncotarget*. 2017; 8:32043–54. <https://doi.org/10.18632/oncotarget.16761>. [PubMed]
49. Ebbesen SH, Scaltriti M, Bialucha CU, Morse N, Kastenhuber ER, Wen HY, Dow LE, Baselga J, Lowe SW. Pten loss promotes MAPK pathway dependency in HER2/neu breast carcinomas. *Proc Natl Acad Sci U S A*. 2016; 113:3030–35. <https://doi.org/10.1073/pnas.1523693113>. [PubMed]
50. Toker A. Achieving specificity in Akt signaling in cancer. *Adv Biol Regul*. 2012; 52:78–87. <https://doi.org/10.1016/j.advenzreg.2011.09.020>. [PubMed]
51. Alessi DR, Andjelkovic M, Caudwell B, Cron P, Morrice N, Cohen P, Hemmings BA. Mechanism of activation of protein kinase B by insulin and IGF-1. *EMBO J*. 1996; 15:6541–51. [PubMed]
52. Alessi DR, James SR, Downes CP, Holmes AB, Gaffney PR, Reese CB, Cohen P. Characterization of a 3-phosphoinositide-dependent protein kinase which phosphorylates and activates protein kinase Balph. *Curr Biol*. 1997; 7:261–69. [https://doi.org/10.1016/s0960-9822\(06\)00122-9](https://doi.org/10.1016/s0960-9822(06)00122-9). [PubMed]
53. Chu N, Salguero AL, Liu AZ, Chen Z, Dempsey DR, Ficarro SB, Alexander WM, Marto JA, Li Y, Amzel LM, Gabelli SB, Cole PA. Akt Kinase Activation Mechanisms Revealed Using Protein Semisynthesis. *Cell*. 2018; 174:897–907.e14. <https://doi.org/10.1016/j.cell.2018.07.003>. [PubMed]
54. Sarbassov DD, Guertin DA, Ali SM, Sabatini DM. Phosphorylation and regulation of Akt/PKB by the rictor-mTOR complex. *Science*. 2005; 307:1098–101. <https://doi.org/10.1126/science.1106148>. [PubMed]
55. Gonzalez E, McGraw TE. The Akt kinases: isoform specificity in metabolism and cancer. *Cell Cycle*. 2009; 8:2502–8. <https://doi.org/10.4161/cc.8.16.9335>. [PubMed]
56. Yang SX, Polley E, Lipkowitz S. New insights on PI3K/AKT pathway alterations and clinical outcomes in breast cancer. *Cancer Treat Rev*. 2016; 45:87–96. <https://doi.org/10.1016/j.ctrv.2016.03.004>. [PubMed]
57. Yang ZY, Di MY, Yuan JQ, Shen WX, Zheng DY, Chen JZ, Mao C, Tang JL. The prognostic value of phosphorylated Akt in breast cancer: a systematic review. *Sci Rep*. 2015; 5:7758. <https://doi.org/10.1038/srep07758>. [PubMed]
58. Chen Y, Huang L, Dong Y, Tao C, Zhang R, Shao H, Shen H. Effect of AKT1 (p. E17K) Hotspot Mutation on Malignant Tumorigenesis and Prognosis. *Front Cell Dev Biol*. 2020; 8:573599. <https://doi.org/10.3389/fcell.2020.573599>. [PubMed]

59. Davies BR, Guan N, Logie A, Crafter C, Hanson L, Jacobs V, James N, Dudley P, Jacques K, Ladd B, D'Cruz CM, Zinda M, Lindemann J, et al. Tumors with AKT1E17K Mutations Are Rational Targets for Single Agent or Combination Therapy with AKT Inhibitors. *Mol Cancer Ther.* 2015; 14:2441–51. <https://doi.org/10.1158/1535-7163.MCT-15-0230>. [PubMed]
60. Hyman DM, Smyth LM, Donoghue MTA, Westin SN, Bedard PL, Dean EJ, Bando H, El-Khoueiry AB, Pérez-Fidalgo JA, Mita A, Schellens JHM, Chang MT, Reichel JB, et al. AKT Inhibition in Solid Tumors With AKT1 Mutations. *J Clin Oncol.* 2017; 35:2251–59. <https://doi.org/10.1200/JCO.2017.73.0143>. [PubMed]
61. Shrestha Bhattarai T, Shamu T, Gorelick AN, Chang MT, Chakravarty D, Gavrila EI, Donoghue MTA, Gao J, Patel S, Gao SP, Reynolds MH, Phillips SM, Soumerai T, et al. AKT mutant allele-specific activation dictates pharmacologic sensitivities. *Nat Commun.* 2022; 13:2111. <https://doi.org/10.1038/s41467-022-29638-1>. [PubMed]
62. Yi KH, Lauring J. Recurrent AKT mutations in human cancers: functional consequences and effects on drug sensitivity. *Oncotarget.* 2016; 7:4241–51. <https://doi.org/10.18632/oncotarget.6648>. [PubMed]
63. Rudolph M, Anzeneder T, Schulz A, Beckmann G, Byrne AT, Jeffers M, Pena C, Politz O, Köchert K, Vonk R, Reischl J. AKT1 (E17K) mutation profiling in breast cancer: prevalence, concurrent oncogenic alterations, and blood-based detection. *BMC Cancer.* 2016; 16:622. <https://doi.org/10.1186/s12885-016-2626-1>. [PubMed]
64. Grottke A, Ewald F, Lange T, Nörz D, Herzberger C, Bach J, Grabinski N, Gräser L, Höppner F, Nashan B, Schumacher U, Jücker M. Downregulation of AKT3 Increases Migration and Metastasis in Triple Negative Breast Cancer Cells by Upregulating S100A4. *PLoS One.* 2016; 11:e0146370. <https://doi.org/10.1371/journal.pone.0146370>. [PubMed]
65. Riggio M, Perrone MC, Polo ML, Rodriguez MJ, May M, Abba M, Lanari C, Novaro V. AKT1 and AKT2 isoforms play distinct roles during breast cancer progression through the regulation of specific downstream proteins. *Sci Rep.* 2017; 7:44244. <https://doi.org/10.1038/srep44244>. [PubMed]
66. Wadhwa B, Paddar M, Khan S, Mir S, A Clarke P, Grabowska AM, Vijay DG, Malik F. AKT isoforms have discrete expression in triple negative breast cancers and roles in cisplatin sensitivity. *Oncotarget.* 2020; 11:4178–94. <https://doi.org/10.18632/oncotarget.27746>. [PubMed]
67. Yang W, Ju JH, Lee KM, Shin I. Akt isoform-specific inhibition of MDA-MB-231 cell proliferation. *Cell Signal.* 2011; 23:19–26. <https://doi.org/10.1016/j.cellsig.2010.07.016>. [PubMed]
68. Chin YR, Yoshida T, Marusyk A, Beck AH, Polyak K, Toker A. Targeting Akt3 signaling in triple-negative breast cancer. *Cancer Res.* 2014; 74:964–73. <https://doi.org/10.1158/0008-5472.CAN-13-2175>. [PubMed]
69. Clark AR, Toker A. Signalling specificity in the Akt pathway in breast cancer. *Biochem Soc Trans.* 2014; 42:1349–55. <https://doi.org/10.1042/BST20140160>. [PubMed]
70. Alayev A, Holz MK. mTOR signaling for biological control and cancer. *J Cell Physiol.* 2013; 228:1658–64. <https://doi.org/10.1002/jcp.24351>. [PubMed]
71. Saxton RA, Sabatini DM. mTOR Signaling in Growth, Metabolism, and Disease. *Cell.* 2017; 168:960–76. <https://doi.org/10.1016/j.cell.2017.02.004>. [PubMed]
72. Linde-Garelli KY, Rogala KB. Structural mechanisms of the mTOR pathway. *Curr Opin Struct Biol.* 2023; 82:102663. <https://doi.org/10.1016/j.sbi.2023.102663>. [PubMed]
73. Panwar V, Singh A, Bhatt M, Tonk RK, Azizov S, Raza AS, Sengupta S, Kumar D, Garg M. Multifaceted role of mTOR (mammalian target of rapamycin) signaling pathway in human health and disease. *Signal Transduct Target Ther.* 2023; 8:375. <https://doi.org/10.1038/s41392-023-01608-z>. [PubMed]
74. Liu GY, Sabatini DM. mTOR at the nexus of nutrition, growth, ageing and disease. *Nat Rev Mol Cell Biol.* 2020; 21:183–203. <https://doi.org/10.1038/s41580-019-0199-y>. [PubMed]
75. Pópulo H, Lopes JM, Soares P. The mTOR signalling pathway in human cancer. *Int J Mol Sci.* 2012; 13:1886–18. <https://doi.org/10.3390/ijms13021886>. [PubMed]
76. Ponnusamy L, Natarajan SR, Thangaraj K, Manoharan R. Therapeutic aspects of AMPK in breast cancer: Progress, challenges, and future directions. *Biochim Biophys Acta Rev Cancer.* 2020; 1874:188379. <https://doi.org/10.1016/j.bbcan.2020.188379>. [PubMed]
77. Hare SH, Harvey AJ. mTOR function and therapeutic targeting in breast cancer. *Am J Cancer Res.* 2017; 7:383–404. [PubMed]
78. Parmar N, Tamanoi F. Rheb G-Proteins and the Activation of mTORC1. *Enzymes.* 2010; 27:39–56. [https://doi.org/10.1016/S1874-6047\(10\)27003-8](https://doi.org/10.1016/S1874-6047(10)27003-8). [PubMed]
79. Bar-Peled L, Chantranupong L, Cherniack AD, Chen WW, Ottina KA, Grabiner BC, Spear ED, Carter SL, Meyerson M, Sabatini DM. A Tumor suppressor complex with GAP activity for the Rag GTPases that signal amino acid sufficiency to mTORC1. *Science.* 2013; 340:1100–6. <https://doi.org/10.1126/science.1232044>. [PubMed]
80. Rogala KB, Gu X, Kedir JF, Abu-Remaileh M, Bianchi LF, Bottino AMS, Dueholm R, Niehaus A, Overwijn D, Fils AP, Zhou SX, Leary D, Laqtom NN, et al. Structural basis for the docking of mTORC1 on the lysosomal surface. *Science.* 2019; 366:468–75. <https://doi.org/10.1126/science.aay0166>. [PubMed]
81. Sancak Y, Bar-Peled L, Zoncu R, Markhard AL, Nada S, Sabatini DM. Ragulator-Rag complex targets mTORC1 to the lysosomal surface and is necessary for its activation by amino acids. *Cell.* 2010; 141:290–303. <https://doi.org/10.1016/j.cell.2010.02.024>. [PubMed]
82. Sancak Y, Peterson TR, Shaul YD, Lindquist RA, Thoreen CC, Bar-Peled L, Sabatini DM. The Rag GTPases bind

- raptor and mediate amino acid signaling to mTORC1. *Science*. 2008; 320:1496–501. <https://doi.org/10.1126/science.1157535>. [PubMed]
83. Valenstein ML, Lalgudi PV, Gu X, Kedir JF, Taylor MS, Chivukula RR, Sabatini DM. Rag-Ragulator is the central organizer of the physical architecture of the mTORC1 nutrient-sensing pathway. *Proc Natl Acad Sci U S A*. 2024; 121:e2322755121. <https://doi.org/10.1073/pnas.2322755121>. [PubMed]
  84. Kang YJ, Lu MK, Guan KL. The TSC1 and TSC2 tumor suppressors are required for proper ER stress response and protect cells from ER stress-induced apoptosis. *Cell Death Differ*. 2011; 18:133–44. <https://doi.org/10.1038/cdd.2010.82>. [PubMed]
  85. Jiang WG, Sampson J, Martin TA, Lee-Jones L, Watkins G, Douglas-Jones A, Mokbel K, Mansel RE. Tuberlin and hamartin are aberrantly expressed and linked to clinical outcome in human breast cancer: the role of promoter methylation of TSC genes. *Eur J Cancer*. 2005; 41:1628–36. <https://doi.org/10.1016/j.ejca.2005.03.023>. [PubMed]
  86. Zhu QY, He ZM, Cao WM, Li B. The role of TSC2 in breast cancer: a literature review. *Front Oncol*. 2023; 13:1188371. <https://doi.org/10.3389/fonc.2023.1188371>. [PubMed]
  87. Zhou Q, Tang S, Zhang X, Chen L. Targeting PRAS40: a novel therapeutic strategy for human diseases. *J Drug Target*. 2021; 29:703–15. <https://doi.org/10.1080/1061186X.2021.1882470>. [PubMed]
  88. Kovalski JR, Bhaduri A, Zehnder AM, Neela PH, Che Y, Wozniak GG, Khavari PA. The Functional Proximal Proteome of Oncogenic Ras Includes mTORC2. *Mol Cell*. 2019; 73:830–44.e12. <https://doi.org/10.1016/j.molcel.2018.12.001>. [PubMed]
  89. Kovalski JR, Shanderson RL, Khavari PA. Ras functional proximity proteomics establishes mTORC2 as new direct ras effector. *Oncotarget*. 2019; 10:5126–35. <https://doi.org/10.18632/oncotarget.27025>. [PubMed]
  90. Battaglioli S, Benjamin D, Wälchli M, Maier T, Hall MN. mTOR substrate phosphorylation in growth control. *Cell*. 2022; 185:1814–36. <https://doi.org/10.1016/j.cell.2022.04.013>. [PubMed]
  91. Orlacchio A, Ranieri M, Brave M, Arciuch VA, Forde T, De Martino D, Anderson KE, Hawkins P, Di Cristofano A. SGK1 Is a Critical Component of an AKT-Independent Pathway Essential for PI3K-Mediated Tumor Development and Maintenance. *Cancer Res*. 2017; 77:6914–26. <https://doi.org/10.1158/0008-5472.CAN-17-2105>. [PubMed]
  92. Sommer EM, Dry H, Cross D, Guichard S, Davies BR, Alessi DR. Elevated SGK1 predicts resistance of breast cancer cells to Akt inhibitors. *Biochem J*. 2013; 452:499–508. <https://doi.org/10.1042/BJ20130342>. [PubMed]
  93. Skolariki A, D’Costa J, Little M, Lord S. Role of PI3K/Akt/mTOR pathway in mediating endocrine resistance: concept to clinic. *Explor Target Antitumor Ther*. 2022; 3:172–99. <https://doi.org/10.37349/etat.2022.00078>. [PubMed]
  94. Engelman JA. Targeting PI3K signalling in cancer: opportunities, challenges and limitations. *Nat Rev Cancer*. 2009; 9:550–62. <https://doi.org/10.1038/nrc2664>. [PubMed]
  95. Vanhaesebroeck B, Perry MWD, Brown JR, André F, Okkenhaug K. PI3K inhibitors are finally coming of age. *Nat Rev Drug Discov*. 2021; 20:741–69. <https://doi.org/10.1038/s41573-021-00209-1>. [PubMed]
  96. André F, Ciruelos E, Rubovszky G, Campone M, Loibl S, Rugo HS, Iwata H, Conte P, Mayer IA, Kaufman B, Yamashita T, Lu YS, Inoue K, et al, and SOLAR-1 Study Group. Alpelisib for *PIK3CA*-Mutated, Hormone Receptor-Positive Advanced Breast Cancer. *N Engl J Med*. 2019; 380:1929–40. <https://doi.org/10.1056/NEJMoa1813904>. [PubMed]
  97. Juric D, Kalinsky K, Im SA, Ciruelos EM, Bianchini G, Barrios CH, Jacot W, Schmid P, Loi S, Rugo HS, Craine V, Hutchinson KE, Flechais A, et al. INAVO121: Phase III study of inavolisib (INAVO) + fulvestrant (FUL) vs. alpelisib (ALP) + FUL in patients (pts) with hormone receptor-positive, HER2-negative (HR+, HER2-) *PIK3CA*-mutated (mut) locally advanced or metastatic breast cancer (LA/mBC). *J Clin Oncol*. 2023; 41:TPS1123. [https://doi.org/10.1200/JCO.2024.42.16\\_suppl.TPS1136](https://doi.org/10.1200/JCO.2024.42.16_suppl.TPS1136).
  98. Turner NC, Im SA, Saura C, Juric D, Loibl S, Kalinsky K, Schmid P, Loi S, Sunpaweravong P, Musolino A, Li H, Zhang Q, Nowecki Z, et al. Inavolisib-Based Therapy in *PIK3CA*-Mutated Advanced Breast Cancer. *N Engl J Med*. 2024; 391:1584–96. <https://doi.org/10.1056/NEJMoa2404625>. [PubMed]
  99. Vuylsteke P, Huizing M, Petrakova K, Roylance R, Laing R, Chan S, Abell F, Gendreau S, Rooney I, Apt D, Zhou J, Singel S, Fehrenbacher L. Pictilisib PI3Kinase inhibitor (a phosphatidylinositol 3-kinase [PI3K] inhibitor) plus paclitaxel for the treatment of hormone receptor-positive, HER2-negative, locally recurrent, or metastatic breast cancer: interim analysis of the multicentre, placebo-controlled, phase II randomised PEGGY study. *Ann Oncol*. 2016; 27:2059–66. <https://doi.org/10.1093/annonc/mdw320>. [PubMed]
  100. Alemi F, Raei Sadigh A, Malakoti F, Elhaei Y, Ghaffari SH, Maleki M, Asemi Z, Yousefi B, Targhazeh N, Majidinia M. Molecular mechanisms involved in DNA repair in human cancers: An overview of PI3k/Akt signaling and PIKKs crosstalk. *J Cell Physiol*. 2022; 237:313–28. <https://doi.org/10.1002/jcp.30573>. [PubMed]
  101. Costa C, Wang Y, Ly A, Hosono Y, Murchie E, Walmsley CS, Huynh T, Healy C, Peterson R, Yanase S, Jakubik CT, Henderson LE, Damon LJ, et al. PTEN Loss Mediates Clinical Cross-Resistance to CDK4/6 and PI3K $\alpha$  Inhibitors in Breast Cancer. *Cancer Discov*. 2020; 10:72–85. <https://doi.org/10.1158/2159-8290.CD-18-0830>. [PubMed]
  102. Turner NC, Oliveira M, Howell SJ, Dalenc F, Cortes J, Gomez Moreno HL, Hu X, Jhaveri K, Krivorotko P, Loibl S, Morales Murillo S, Okera M, Park YH, et al, and CAPItello-291 Study Group. Capivasertib in Hormone Receptor-Positive Advanced Breast Cancer. *N Engl J Med*. 2023; 388:2058–70. <https://doi.org/10.1056/NEJMoa2214131>. [PubMed]

103. Wylaż M, Kaczmarska A, Pajor D, Hryniewicki M, Gil D, Dulińska-Litewka J. Exploring the role of PI3K/AKT/mTOR inhibitors in hormone-related cancers: A focus on breast and prostate cancer. *Biomed Pharmacother.* 2023; 168:115676. <https://doi.org/10.1016/j.biopha.2023.115676>. [PubMed]
104. Dent R, Oliveira M, Isakoff SJ, Im SA, Espié M, Blau S, Tan AR, Saura C, Wongchenko MJ, Xu N, Bradley D, Reilly SJ, Mani A, Kim SB, and LOTUS investigators. Final results of the double-blind placebo-controlled randomized phase 2 LOTUS trial of first-line ipatasertib plus paclitaxel for inoperable locally advanced/metastatic triple-negative breast cancer. *Breast Cancer Res Treat.* 2021; 189:377–86. <https://doi.org/10.1007/s10549-021-06143-5>. [PubMed]
105. Baselga J, Campone M, Piccart M, Burris HA 3rd, Rugo HS, Sahnoud T, Noguchi S, Gnant M, Pritchard KI, Lebrun F, Beck JT, Ito Y, Yardley D, et al. Everolimus in postmenopausal hormone-receptor-positive advanced breast cancer. *N Engl J Med.* 2012; 366:520–29. <https://doi.org/10.1056/NEJMoa1109653>. [PubMed]
106. Guichard SM, Curwen J, Bihani T, D’Cruz CM, Yates JW, Grondine M, Howard Z, Davies BR, Bigley G, Klinowska T, Pike KG, Pass M, Chresta CM, et al. AZD2014, an Inhibitor of mTORC1 and mTORC2, Is Highly Effective in ER+ Breast Cancer When Administered Using Intermittent or Continuous Schedules. *Mol Cancer Ther.* 2015; 14:2508–18. <https://doi.org/10.1158/1535-7163.MCT-15-0365>. [PubMed]
107. Rossetti S, Broege A, Sen A, Khan S, MacNeil I, Molden J, Kopher R, Schulz S, Laing L. Gedatolisib shows superior potency and efficacy versus single-node PI3K/AKT/mTOR inhibitors in breast cancer models. *NPJ Breast Cancer.* 2024; 10:40. <https://doi.org/10.1038/s41523-024-00648-0>. [PubMed]
108. Sanchez-Vega F, Mina M, Armenia J, Chatila WK, Luna A, La KC, Dimitriadou S, Liu DL, Kantheti HS, Saghafeina S, Chakravarty D, Daiyan F, Gao Q, et al, and Cancer Genome Atlas Research Network. Oncogenic Signaling Pathways in The Cancer Genome Atlas. *Cell.* 2018; 173:321–37.e10. <https://doi.org/10.1016/j.cell.2018.03.035>. [PubMed]
109. Li L, Zhao GD, Shi Z, Qi LL, Zhou LY, Fu ZX. The Ras/Raf/MEK/ERK signaling pathway and its role in the occurrence and development of HCC. *Oncol Lett.* 2016; 12:3045–50. <https://doi.org/10.3892/ol.2016.5110>. [PubMed]
110. Fry EA, Inoue K. Aberrant expression of ETS1 and ETS2 proteins in cancer. *Cancer Rep Rev.* 2018; 2:10.15761/CRR.1000151. <https://doi.org/10.15761/CRR.1000151>. [PubMed]
111. Kawahara T, Shareef HK, Aljarah AK, Ide H, Li Y, Kashiwagi E, Netto GJ, Zheng Y, Miyamoto H. ELK1 is up-regulated by androgen in bladder cancer cells and promotes tumor progression. *Oncotarget.* 2015; 6:29860–76. <https://doi.org/10.18632/oncotarget.5007>. [PubMed]
112. Smith LM, Wise SC, Hendricks DT, Sabichi AL, Bos T, Reddy P, Brown PH, Birrer MJ. cJun overexpression in MCF-7 breast cancer cells produces a tumorigenic, invasive and hormone resistant phenotype. *Oncogene.* 1999; 18:6063–70. <https://doi.org/10.1038/sj.onc.1202989>. [PubMed]
113. Kan Z, Ding Y, Kim J, Jung HH, Chung W, Lal S, Cho S, Fernandez-Banet J, Lee SK, Kim SW, Lee JE, Choi YL, Deng S, et al. Multi-omics profiling of younger Asian breast cancers reveals distinctive molecular signatures. *Nat Commun.* 2018; 9:1725. <https://doi.org/10.1038/s41467-018-04129-4>. [PubMed]
114. Kareff S, Rodriguez E, Dawar R, Trabolsi A, Gallegos JAO, Yin J. Molecular characteristics and clinical outcomes of breast cancer with HRAS mutations. *J Clin Oncol.* 2022; 40:561. [https://doi.org/10.1200/JCO.2022.40.16\\_suppl.56](https://doi.org/10.1200/JCO.2022.40.16_suppl.56).
115. Pereira B, Chin SF, Rueda OM, Vollan HK, Provenzano E, Bardwell HA, Pugh M, Jones L, Russell R, Sammut SJ, Tsui DW, Liu B, Dawson SJ, et al. The somatic mutation profiles of 2,433 breast cancers refines their genomic and transcriptomic landscapes. *Nat Commun.* 2016; 7:11479. <https://doi.org/10.1038/ncomms11479>. [PubMed]
116. Stephens PJ, Tarpey PS, Davies H, Van Loo P, Greenman C, Wedge DC, Nik-Zainal S, Martin S, Varela I, Bignell GR, Yates LR, Papaemmanuil E, Beare D, et al, and Oslo Breast Cancer Consortium (OSBREAC). The landscape of cancer genes and mutational processes in breast cancer. *Nature.* 2012; 486:400–4. <https://doi.org/10.1038/nature11017>. [PubMed]
117. Cancer Genome Atlas Network. Comprehensive molecular portraits of human breast tumours. *Nature.* 2012; 490:61–70. <https://doi.org/10.1038/nature11412>. [PubMed]
118. Rocca A, Braga L, Volpe MC, Maiocchi S, Generali D. The Predictive and Prognostic Role of RAS-RAF-MEK-ERK Pathway Alterations in Breast Cancer: Revision of the Literature and Comparison with the Analysis of Cancer Genomic Datasets. *Cancers (Basel).* 2022; 14:5306. <https://doi.org/10.3390/cancers14215306>. [PubMed]
119. von Lintig FC, Dreilinger AD, Varki NM, Wallace AM, Casteel DE, Boss GR. Ras activation in human breast cancer. *Breast Cancer Res Treat.* 2000; 62:51–62. <https://doi.org/10.1023/a:1006491619920>. [PubMed]
120. McLaughlin SK, Olsen SN, Dake B, De Raedt T, Lim E, Bronson RT, Beroukhim R, Polyak K, Brown M, Kuperwasser C, Cichowski K. The RasGAP gene, RASAL2, is a tumor and metastasis suppressor. *Cancer Cell.* 2013; 24:365–78. <https://doi.org/10.1016/j.ccr.2013.08.004>. [PubMed]
121. Carpenter G, King L Jr, Cohen S. Epidermal growth factor stimulates phosphorylation in membrane preparations *in vitro*. *Nature.* 1978; 276:409–10. <https://doi.org/10.1038/276409a0>. [PubMed]
122. King CR, Kraus MH, Aaronson SA. Amplification of a novel v-erbB-related gene in a human mammary carcinoma. *Science.* 1985; 229:974–76. <https://doi.org/10.1126/science.2992089>. [PubMed]

123. Sirkisoon SR, Carpenter RL, Rimkus T, Miller L, Metheny-Barlow L, Lo HW. EGFR and HER2 signaling in breast cancer brain metastasis. *Front Biosci (Elite Ed)*. 2016; 8:245–63. <https://doi.org/10.2741/E765>. [PubMed]
124. Slamon DJ, Clark GM, Wong SG, Levin WJ, Ullrich A, McGuire WL. Human breast cancer: correlation of relapse and survival with amplification of the HER-2/neu oncogene. *Science*. 1987; 235:177–82. <https://doi.org/10.1126/science.3798106>. [PubMed]
125. Ibragimova KIE, Geurts SME, Meegdes M, Erdkamp F, Heijns JB, Tol J, Vriens BEP, Dercksen MW, Aaldering KNA, Pepels MJA, van de Winkel L, Peters NAJ, Teeuwen-Dedroog NJA, et al. Outcomes for the first four lines of therapy in patients with HER2-positive advanced breast cancer: results from the SONABRE registry. *Breast Cancer Res Treat*. 2023; 198:239–51. <https://doi.org/10.1007/s10549-022-06832-9>. [PubMed]
126. Jagosky M, Tan AR. Combination of Pertuzumab and Trastuzumab in the Treatment of HER2-Positive Early Breast Cancer: A Review of the Emerging Clinical Data. *Breast Cancer (Dove Med Press)*. 2021; 13:393–407. <https://doi.org/10.2147/BCTT.S176514>. [PubMed]
127. Harris RC, Chung E, Coffey RJ. EGF receptor ligands. *Exp Cell Res*. 2003; 284:2–13. [https://doi.org/10.1016/s0014-4827\(02\)00105-2](https://doi.org/10.1016/s0014-4827(02)00105-2). [PubMed]
128. Schechter AL, Stern DF, Vaidyanathan L, Decker SJ, Drebin JA, Greene MI, Weinberg RA. The neu oncogene: an erb-B-related gene encoding a 185,000-Mr tumour antigen. *Nature*. 1984; 312:513–16. <https://doi.org/10.1038/312513a0>. [PubMed]
129. Weinberg F, Peckys DB, de Jonge N. EGFR Expression in HER2-Driven Breast Cancer Cells. *Int J Mol Sci*. 2020; 21:9008. <https://doi.org/10.3390/ijms21239008>. [PubMed]
130. Hynes NE, Horsch K, Olayioye MA, Badache A. The ErbB receptor tyrosine family as signal integrators. *Endocr Relat Cancer*. 2001; 8:151–59. <https://doi.org/10.1677/erc.0.0080151>. [PubMed]
131. Klapper LN, Glathe S, Vaisman N, Hynes NE, Andrews GC, Sela M, Yarden Y. The ErbB-2/HER2 oncoprotein of human carcinomas may function solely as a shared coreceptor for multiple stroma-derived growth factors. *Proc Natl Acad Sci U S A*. 1999; 96:4995–5000. <https://doi.org/10.1073/pnas.96.9.4995>. [PubMed]
132. Jura N, Shan Y, Cao X, Shaw DE, Kuriyan J. Structural analysis of the catalytically inactive kinase domain of the human EGF receptor 3. *Proc Natl Acad Sci U S A*. 2009; 106:21608–13. <https://doi.org/10.1073/pnas.0912101106>. [PubMed]
133. Tzahar E, Waterman H, Chen X, Levkowitz G, Karunagaran D, Lavi S, Ratzkin BJ, Yarden Y. A hierarchical network of interreceptor interactions determines signal transduction by Neu differentiation factor/neuregulin and epidermal growth factor. *Mol Cell Biol*. 1996; 16:5276–87. <https://doi.org/10.1128/MCB.16.10.5276>. [PubMed]
134. Zhang Q, Park E, Kani K, Landgraf R. Functional isolation of activated and unilaterally phosphorylated heterodimers of ERBB2 and ERBB3 as scaffolds in ligand-dependent signaling. *Proc Natl Acad Sci U S A*. 2012; 109:13237–42. <https://doi.org/10.1073/pnas.1200105109>. [PubMed]
135. Chiu CG, Masoudi H, Leung S, Voduc DK, Gilks B, Huntsman DG, Wiseman SM. HER-3 overexpression is prognostic of reduced breast cancer survival: a study of 4046 patients. *Ann Surg*. 2010; 251:1107–16. <https://doi.org/10.1097/SLA.0b013e3181dbb77e>. [PubMed]
136. Kol A, Terwisscha van Scheltinga AG, Timmer-Bosscha H, Lamberts LE, Bensch F, de Vries EG, Schröder CP. HER3, serious partner in crime: therapeutic approaches and potential biomarkers for effect of HER3-targeting. *Pharmacol Ther*. 2014; 143:1–11. <https://doi.org/10.1016/j.pharmthera.2014.01.005>. [PubMed]
137. Tebbutt N, Pedersen MW, Johns TG. Targeting the ERBB family in cancer: couples therapy. *Nat Rev Cancer*. 2013; 13:663–73. <https://doi.org/10.1038/nrc3559>. [PubMed]
138. Blangé D, Stroes CI, Derks S, Bijlsma MF, van Laarhoven HWM. Resistance mechanisms to HER2-targeted therapy in gastroesophageal adenocarcinoma: A systematic review. *Cancer Treat Rev*. 2022; 108:102418. <https://doi.org/10.1016/j.ctrv.2022.102418>. [PubMed]
139. Dhillon AS, Hagan S, Rath O, Kolch W. MAP kinase signalling pathways in cancer. *Oncogene*. 2007; 26:3279–90. <https://doi.org/10.1038/sj.onc.1210421>. [PubMed]
140. She QB, Chandralapaty S, Ye Q, Lobo J, Haskell KM, Leander KR, DeFeo-Jones D, Huber HE, Rosen N. Breast tumor cells with PI3K mutation or HER2 amplification are selectively addicted to Akt signaling. *PLoS One*. 2008; 3:e3065. <https://doi.org/10.1371/journal.pone.0003065>. [PubMed]
141. Martínez-Sáez O, Prat A. Current and Future Management of HER2-Positive Metastatic Breast Cancer. *JCO Oncol Pract*. 2021; 17:594–604. <https://doi.org/10.1200/OP.21.00172>. [PubMed]
142. Berns K, Horlings HM, Hennessy BT, Madiredjo M, Hijmans EM, Beelen K, Linn SC, Gonzalez-Angulo AM, Stemke-Hale K, Hauptmann M, Beijersbergen RL, Mills GB, van de Vijver MJ, Bernards R. A functional genetic approach identifies the PI3K pathway as a major determinant of trastuzumab resistance in breast cancer. *Cancer Cell*. 2007; 12:395–402. <https://doi.org/10.1016/j.ccr.2007.08.030>. [PubMed]
143. Rasti AR, Guimaraes-Young A, Datko F, Borges VF, Aisner DL, Shagisultanova E. *PIK3CA* Mutations Drive Therapeutic Resistance in Human Epidermal Growth Factor Receptor 2-Positive Breast Cancer. *JCO Precis Oncol*. 2022; 6:e2100370. <https://doi.org/10.1200/PO.21.00370>. [PubMed]
144. Burnett JP, Korkaya H, Ouzounova MD, Jiang H, Conley SJ, Newman BW, Sun L, Connarn JN, Chen CS, Zhang N, Wicha MS, Sun D. Trastuzumab resistance induces EMT to transform HER2(+) PTEN(-) to a triple negative



- breast cancer that requires unique treatment options. *Sci Rep.* 2015; 5:15821. <https://doi.org/10.1038/srep15821>. [PubMed]
145. Nagata Y, Lan KH, Zhou X, Tan M, Esteva FJ, Sahin AA, Klos KS, Li P, Monia BP, Nguyen NT, Hortobagyi GN, Hung MC, Yu D. PTEN activation contributes to tumor inhibition by trastuzumab, and loss of PTEN predicts trastuzumab resistance in patients. *Cancer Cell.* 2004; 6:117–27. <https://doi.org/10.1016/j.ccr.2004.06.022>. [PubMed]
  146. Chung WP, Huang WL, Lee CH, Hsu HP, Huang WL, Liu YY, Su WC. PI3K inhibitors in trastuzumab-resistant HER2-positive breast cancer cells with PI3K pathway alterations. *Am J Cancer Res.* 2022; 12:3067–82. [PubMed]
  147. Fujimoto Y, Morita TY, Ohashi A, Haeno H, Hakozaki Y, Fujii M, Kashima Y, Kobayashi SS, Mukohara T. Combination treatment with a PI3K/Akt/mTOR pathway inhibitor overcomes resistance to anti-HER2 therapy in PIK3CA-mutant HER2-positive breast cancer cells. *Sci Rep.* 2020; 10:21762. <https://doi.org/10.1038/s41598-020-78646-y>. [PubMed]
  148. Smith AE, Ferraro E, Safonov A, Morales CB, Lahuerta EJA, Li Q, Kulick A, Ross D, Solit DB, de Stanchina E, Reis-Filho J, Rosen N, Arribas J, et al. HER2 + breast cancers evade anti-HER2 therapy via a switch in driver pathway. *Nat Commun.* 2021; 12:6667. <https://doi.org/10.1038/s41467-021-27093-y>. [PubMed]
  149. Zazo S, González-Alonso P, Martín-Aparicio E, Chamizo C, Luque M, Sanz-Álvarez M, Mínguez P, Gómez-López G, Cristóbal I, Caramés C, García-Foncillas J, Eroles P, Lluch A, et al. Autocrine CCL5 Effect Mediates Trastuzumab Resistance by ERK Pathway Activation in HER2-Positive Breast Cancer. *Mol Cancer Ther.* 2020; 19:1696–707. <https://doi.org/10.1158/1535-7163.MCT-19-1172>. [PubMed]
  150. Moo TA, Sanford R, Dang C, Morrow M. Overview of Breast Cancer Therapy. *PET Clin.* 2018; 13:339–54. <https://doi.org/10.1016/j.cpet.2018.02.006>. [PubMed]
  151. Modi S, Saura C, Yamashita T, Park YH, Kim SB, Tamura K, Andre F, Iwata H, Ito Y, Tsurutani J, Sohn J, Denduluri N, Perrin C, et al, and DESTINY-Breast01 Investigators. Trastuzumab Deruxtecan in Previously Treated HER2-Positive Breast Cancer. *N Engl J Med.* 2020; 382:610–21. <https://doi.org/10.1056/NEJMoa1914510>. [PubMed]
  152. Verma S, Miles D, Gianni L, Krop IE, Welslau M, Baselga J, Pegram M, Oh DY, Diéras V, Guardino E, Fang L, Lu MW, Olsen S, Blackwell K, and EMILIA Study Group. Trastuzumab emtansine for HER2-positive advanced breast cancer. *N Engl J Med.* 2012; 367:1783–91. <https://doi.org/10.1056/NEJMoa1209124>. [PubMed]
  153. Swain SM, Shastry M, Hamilton E. Targeting HER2-positive breast cancer: advances and future directions. *Nat Rev Drug Discov.* 2023; 22:101–26. <https://doi.org/10.1038/s41573-022-00579-0>. [PubMed]
  154. Dawood S, Broglio K, Buzdar AU, Hortobagyi GN, Giordano SH. Prognosis of women with metastatic breast cancer by HER2 status and trastuzumab treatment: an institutional-based review. *J Clin Oncol.* 2010; 28:92–98. <https://doi.org/10.1200/JCO.2008.19.9844>. [PubMed]
  155. Baselga J. Treatment of HER2-overexpressing breast cancer. *Ann Oncol.* 2010 (Suppl 7); vii36–40. <https://doi.org/10.1093/annonc/mdq421>. [PubMed]
  156. von Minckwitz G, Procter M, de Azambuja E, Zardavas D, Benyunes M, Viale G, Suter T, Arahmani A, Rouchet N, Clark E, Knott A, Lang I, Levy C, et al, and APHINITY Steering Committee and Investigators. Adjuvant Pertuzumab and Trastuzumab in Early HER2-Positive Breast Cancer. *N Engl J Med.* 2017; 377:122–31. <https://doi.org/10.1056/NEJMoa1703643>. [PubMed]
  157. Murthy RK, Loi S, Okines A, Paplomata E, Hamilton E, Hurvitz SA, Lin NU, Borges V, Abramson V, Anders C, Bedard PL, Oliveira M, Jakobsen E, et al. Tucatinib, Trastuzumab, and Capecitabine for HER2-Positive Metastatic Breast Cancer. *N Engl J Med.* 2020; 382:597–609. <https://doi.org/10.1056/NEJMoa1914609>. [PubMed]
  158. Saura C, Oliveira M, Feng YH, Dai MS, Chen SW, Hurvitz SA, Kim SB, Moy B, Delaloge S, Gradishar W, Masuda N, Palacova M, Trudeau ME, et al, and NALA Investigators. Neratinib Plus Capecitabine Versus Lapatinib Plus Capecitabine in HER2-Positive Metastatic Breast Cancer Previously Treated With ≥ 2 HER2-Directed Regimens: Phase III NALA Trial. *J Clin Oncol.* 2020; 38:3138–49. <https://doi.org/10.1200/JCO.20.00147>. [PubMed]
  159. Schlam I, Swain SM. HER2-positive breast cancer and tyrosine kinase inhibitors: the time is now. *NPJ Breast Cancer.* 2021; 7:56. <https://doi.org/10.1038/s41523-021-00265-1>. [PubMed]
  160. Hu W, Yang J, Zhang Z, Xu D, Li N. Pyrotinib for HER2-positive metastatic breast cancer: a systematic review and meta-analysis. *Transl Cancer Res.* 2023; 12:247–56. <https://doi.org/10.21037/tcr-22-1746>. [PubMed]
  161. Wang X, Wong J, Sevinsky CJ, Kokabee L, Khan F, Sun Y, Conklin DS. Bruton's Tyrosine Kinase Inhibitors Prevent Therapeutic Escape in Breast Cancer Cells. *Mol Cancer Ther.* 2016; 15:2198–208. <https://doi.org/10.1158/1535-7163.MCT-15-0813>. [PubMed]
  162. Chen J, Kinoshita T, Sukbuntherng J, Chang BY, Elias L. Ibrutinib Inhibits ERBB Receptor Tyrosine Kinases and HER2-Amplified Breast Cancer Cell Growth. *Mol Cancer Ther.* 2016; 15:2835–44. <https://doi.org/10.1158/1535-7163.MCT-15-0923>. [PubMed]
  163. Cortés J, Kim SB, Chung WP, Im SA, Park YH, Hegg R, Kim MH, Tseng LM, Petry V, Chung CF, Iwata H, Hamilton E, Curigliano G, et al, and DESTINY-Breast03 Trial Investigators. Trastuzumab Deruxtecan versus Trastuzumab Emtansine for Breast Cancer. *N Engl J Med.* 2022; 386:1143–54. <https://doi.org/10.1056/NEJMoa2115022>. [PubMed]
  164. Barok M, Le Joncour V, Martins A, Isola J, Salmikangas M, Laakkonen P, Joensuu H. ARX788, a novel anti-HER2 antibody-drug conjugate, shows anti-tumor

- effects in preclinical models of trastuzumab emtansine-resistant HER2-positive breast cancer and gastric cancer. *Cancer Lett.* 2020; 473:156–63. <https://doi.org/10.1016/j.canlet.2019.12.037>. [PubMed]
165. Skidmore L, Sakamuri S, Knudsen NA, Hewet AG, Milutinovic S, Barkho W, Biroc SL, Kirtley J, Marsden R, Storey K, Lopez I, Yu W, Fang SY, et al. ARX788, a Site-specific Anti-HER2 Antibody-Drug Conjugate, Demonstrates Potent and Selective Activity in HER2-low and T-DM1-resistant Breast and Gastric Cancers. *Mol Cancer Ther.* 2020; 19:1833–43. <https://doi.org/10.1158/1535-7163.MCT-19-1004>. [PubMed]
  166. Deckert J, Thirlway J, Park YH, Song HY, Chung CW, Wang X. Abstract 1753: IKS014, a HER2-targeting antibody drug conjugate incorporating novel bioconjugation and tumor-selective linker technology with improved *in vivo* efficacy and tolerability. *Cancer Res.* 2022; 82:1753. <https://doi.org/10.1158/1538-7445.AM2022-1753>.
  167. Li Q, Cheng Y, Tong Z, Liu Y, Wang X, Yan M, Chang J, Wang S, Du C, Li L, Wu C, Wang M, Wang Z, et al. HER2-targeting antibody drug conjugate FS-1502 in HER2-expressing metastatic breast cancer: a phase 1a/1b trial. *Nat Commun.* 2024; 15:5158. <https://doi.org/10.1038/s41467-024-48798-w>. [PubMed]
  168. Hong KB, An H. Degradable-Antibody Conjugates: Emerging New Modality. *J Med Chem.* 2023; 66:140–48. <https://doi.org/10.1021/acs.jmedchem.2c01791>. [PubMed]
  169. Hurvitz SA, Hamilton EP, Spira AI, Pohlmann PR, Giordano A, Clifton K. A phase 1, first-in-human, open label, escalation and expansion study of ORM-5029, a highly potent GSPT1 degrader targeting HER2, in patients with HER2-expressing advanced solid tumors. *Journal of Clinical Oncology.* 2023; 41: TPS1114. [https://doi.org/10.1200/JCO.2023.41.16\\_suppl.TPS11](https://doi.org/10.1200/JCO.2023.41.16_suppl.TPS11).
  170. Bild AH, Parker JS, Gustafson AM, Acharya CR, Hoadley KA, Anders C, Marcom PK, Carey LA, Potti A, Nevins JR, Perou CM. An integration of complementary strategies for gene-expression analysis to reveal novel therapeutic opportunities for breast cancer. *Breast Cancer Res.* 2009; 11:R55. <https://doi.org/10.1186/bcr2344>. [PubMed]
  171. Gatzka ML, Lucas JE, Barry WT, Kim JW, Wang Q, Crawford MD, Datto MB, Kelley M, Mathey-Prevot B, Potti A, Nevins JR. A pathway-based classification of human breast cancer. *Proc Natl Acad Sci U S A.* 2010; 107:6994–9. <https://doi.org/10.1073/pnas.0912708107>. [PubMed]
  172. Munzone E, Gray KP, Fumagalli C, Guerini-Rocco E, Láng I, Ruhstaller T, Gianni L, Kammeler R, Viale G, Di Leo A, Coates AS, Gelber RD, Regan MM, et al. Mutational analysis of triple-negative breast cancers within the International Breast Cancer Study Group (IBCSG) Trial 22-00. *Breast Cancer Res Treat.* 2018; 170:351–60. <https://doi.org/10.1007/s10549-018-4767-1>. [PubMed]
  173. Pircher M, Winder T, Trojan A. Response to Vemurafenib in Metastatic Triple-Negative Breast Cancer Harboring a BRAF V600E Mutation: A Case Report and Electronically Captured Patient-Reported Outcome. *Case Rep Oncol.* 2021; 14:616–21. <https://doi.org/10.1159/000513905>. [PubMed]
  174. Seo T, Noguchi E, Yoshida M, Mori T, Tanioka M, Sudo K, Shimomura A, Yonemori K, Fujiwara Y, Tamura K. Response to Dabrafenib and Trametinib of a Patient with Metaplastic Breast Carcinoma Harboring a BRAF V600E Mutation. *Case Rep Oncol Med.* 2020; 2020:2518383. <https://doi.org/10.1155/2020/2518383>. [PubMed]
  175. Leung EY, Kim JE, Askarian-Amiri M, Rewcastle GW, Finlay GJ, Baguley BC. Relationships between signaling pathway usage and sensitivity to a pathway inhibitor: examination of trametinib responses in cultured breast cancer lines. *PLoS One.* 2014; 9:e105792. <https://doi.org/10.1371/journal.pone.0105792>. [PubMed]
  176. Serra V, Scaltriti M, Prudkin L, Eichhorn PJ, Ibrahim YH, Chandarlapaty S, Markman B, Rodriguez O, Guzman M, Rodriguez S, Gili M, Russillo M, Parra JL, et al. PI3K inhibition results in enhanced HER signaling and acquired ERK dependency in HER2-overexpressing breast cancer. *Oncogene.* 2011; 30:2547–57. <https://doi.org/10.1038/onc.2010.626>. [PubMed]
  177. Lim B, Peterson CB, Davis A, Cho E, Pearson T, Liu H, Hwang M, Ueno NT, Lee J. ONC201 and an MEK Inhibitor Trametinib Synergistically Inhibit the Growth of Triple-Negative Breast Cancer Cells. *Biomedicines.* 2021; 9:1410. <https://doi.org/10.3390/biomedicines9101410>. [PubMed]
  178. Wang X, Lee KS, Zeng X, Sun T, Im YH, Li H, Wang K, Li H, Zhou P, Bao Y, Jiang Z. Zanidatamab (zani), a HER2-targeted bispecific antibody, in combination with docetaxel as first-line therapy (1L) for patients (pts) with advanced HER2-positive breast cancer (BC): Updated results from a phase 1b/II study. *JCO Global Oncology.* 2023; 9:1. [https://doi.org/10.1200/GO.2023.9.Supplement\\_1.1](https://doi.org/10.1200/GO.2023.9.Supplement_1.1).
  179. Yu J, Mu Q, Fung M, Xu X, Zhu L, Ho RJY. Challenges and opportunities in metastatic breast cancer treatments: Nano-drug combinations delivered preferentially to metastatic cells may enhance therapeutic response. *Pharmacol Ther.* 2022; 236:108108. <https://doi.org/10.1016/j.pharmthera.2022.108108>. [PubMed]
  180. Chandarlapaty S. Negative feedback and adaptive resistance to the targeted therapy of cancer. *Cancer Discov.* 2012; 2:311–9. <https://doi.org/10.1158/2159-8290.CD-12-0018>. [PubMed]
  181. Mayer IA, Abramson VG, Formisano L, Balko JM, Estrada MV, Sanders ME, Juric D, Solit D, Berger MF, Won HH, Li Y, Cantley LC, Winer E, Arteaga CL. A Phase Ib Study of Alpelisib (BYL719), a PI3K $\alpha$ -Specific Inhibitor, with Letrozole in ER+/HER2- Metastatic Breast Cancer. *Clin Cancer Res.* 2017; 23:26–34. <https://doi.org/10.1158/1078-0432.CCR-16-0134>. [PubMed]
  182. O'Reilly KE, Rojo F, She QB, Solit D, Mills GB, Smith D, Lane H, Hofmann F, Hicklin DJ, Ludwig DL, Baselga J, Rosen N. mTOR inhibition induces upstream receptor tyrosine kinase signaling and activates Akt. *Cancer Res.*

- 2006; 66:1500–8. <https://doi.org/10.1158/0008-5472.CAN-05-2925>. [PubMed]
183. Glaviano A, Foo ASC, Lam HY, Yap KCH, Jacot W, Jones RH, Eng H, Nair MG, Makvandi P, Geoerger B, Kulke MH, Baird RD, Prabhu JS, et al. PI3K/AKT/mTOR signaling transduction pathway and targeted therapies in cancer. *Mol Cancer*. 2023; 22:138. <https://doi.org/10.1186/s12943-023-01827-6>. [PubMed]
  184. Fruman DA, Chiu H, Hopkins BD, Bagrodia S, Cantley LC, Abraham RT. The PI3K Pathway in Human Disease. *Cell*. 2017; 170:605–35. <https://doi.org/10.1016/j.cell.2017.07.029>. [PubMed]
  185. Coussy F, El Botty R, Lavigne M, Gu C, Fuhrmann L, Briaux A, de Koning L, Dahmani A, Montaudon E, Morisset L, Huguet L, Sourd L, Painsec P, et al. Combination of PI3K and MEK inhibitors yields durable remission in PDX models of PIK3CA-mutated metaplastic breast cancers. *J Hematol Oncol*. 2020; 13:13. <https://doi.org/10.1186/s13045-020-0846-y>. [PubMed]
  186. Vasan N, Razavi P, Johnson JL, Shao H, Shah H, Antoine A, Ladewig E, Gorelick A, Lin TY, Toska E, Xu G, Kazmi A, Chang MT, et al. Double *PIK3CA* mutations in cis increase oncogenicity and sensitivity to PI3K $\alpha$  inhibitors. *Science*. 2019; 366:714–23. <https://doi.org/10.1126/science.aaw9032>. [PubMed]
  187. Turner NC, Ro J, André F, Loi S, Verma S, Iwata H, Harbeck N, Loibl S, Huang Bartlett C, Zhang K, Giorgetti C, Randolph S, Koehler M, Cristofanilli M, and PALOMA3 Study Group. Palbociclib in Hormone-Receptor-Positive Advanced Breast Cancer. *N Engl J Med*. 2015; 373:209–19. <https://doi.org/10.1056/NEJMoa1505270>. [PubMed]
  188. Juric D, Janku F, Rodón J, Burris HA, Mayer IA, Schuler M, Seggewiss-Bernhardt R, Gil-Martin M, Middleton MR, Baselga J, Bootle D, Demanse D, Blumenstein L, et al. Alpelisib Plus Fulvestrant in PIK3CA-Altered and PIK3CA-Wild-Type Estrogen Receptor-Positive Advanced Breast Cancer: A Phase 1b Clinical Trial. *JAMA Oncol*. 2019; 5:e184475. <https://doi.org/10.1001/jamaoncol.2018.4475>. [PubMed]
  189. Hopkins BD, Pauli C, Du X, Wang DG, Li X, Wu D, Amadiume SC, Goncalves MD, Hodakoski C, Lundquist MR, Bareja R, Ma Y, Harris EM, et al. Suppression of insulin feedback enhances the efficacy of PI3K inhibitors. *Nature*. 2018; 560:499–503. <https://doi.org/10.1038/s41586-018-0343-4>. [PubMed]
  190. Sun P, Meng LH. Emerging roles of class I PI3K inhibitors in modulating tumor microenvironment and immunity. *Acta Pharmacol Sin*. 2020; 41:1395–402. <https://doi.org/10.1038/s41401-020-00500-8>. [PubMed]
  191. Carnevalli LS, Sinclair C, Taylor MA, Gutierrez PM, Langdon S, Coenen-Stass AML, Mooney L, Hughes A, Jarvis L, Staniszewska A, Crafter C, Sidders B, Hardaker E, et al. PI3K $\alpha/\delta$  inhibition promotes anti-tumor immunity through direct enhancement of effector CD8<sup>+</sup> T-cell activity. *J Immunother Cancer*. 2018; 6:158. <https://doi.org/10.1186/s40425-018-0457-0>. [PubMed]
  192. Fritsch C, Huang A, Chatenay-Rivauday C, Schnell C, Reddy A, Liu M, Kauffmann A, Guthy D, Erdmann D, De Pover A, Furet P, Gao H, Ferretti S, et al. Characterization of the novel and specific PI3K $\alpha$  inhibitor NVP-BYL719 and development of the patient stratification strategy for clinical trials. *Mol Cancer Ther*. 2014; 13:1117–29. <https://doi.org/10.1158/1535-7163.MCT-13-0865>. [PubMed]
  193. Beltran P, Dhirendra S, Xu R, Chen M, Czyzyk D, Donovan S, Feng S, Feng C, Fu L, Lightstone F, Lin K, Maciag A, Nissley D, et al. Abstract RF02-02: BBO-10203, a first-in-class, orally bioavailable, selective covalent small molecule that inhibits RAS-driven PI3K $\alpha$  activity without affecting glucose metabolism. *Cancer Res*. 2024; 84:RF02-02. <https://doi.org/10.1158/1538-7445.SABCS23-RF02-02>.
  194. Gumusay O, Vitiello PP, Wabl C, Corcoran RB, Bardelli A, Rugo HS. Strategic Combinations to Prevent and Overcome Resistance to Targeted Therapies in Oncology. *Am Soc Clin Oncol Educ Book*. 2020; 40:e292–308. [https://doi.org/10.1200/EDBK\\_280845](https://doi.org/10.1200/EDBK_280845). [PubMed]
  195. Lim SY, Menzies AM, Rizos H. Mechanisms and strategies to overcome resistance to molecularly targeted therapy for melanoma. *Cancer*. 2017; 123:2118–29. <https://doi.org/10.1002/cncr.30435>. [PubMed]
  196. Antonia SJ, Larkin J, Ascierto PA. Immuno-oncology combinations: a review of clinical experience and future prospects. *Clin Cancer Res*. 2014; 20:6258–68. <https://doi.org/10.1158/1078-0432.CCR-14-1457>. [PubMed]
  197. Ascierto PA, Addeo R, Carteni G, Daniele B, De Laurentis M, Ianniello GP, Morabito A, Palmieri G, Pepe S, Perrone F, Pignata S, Montesarchio V. The role of immunotherapy in solid tumors: report from the Campania Society of Oncology Immunotherapy (SCITO) meeting, Naples 2014. *J Transl Med*. 2014; 12:291. <https://doi.org/10.1186/s12967-014-0291-1>. [PubMed]
  198. Keller HR, Zhang X, Li L, Schaidler H, Wells JW. Overcoming resistance to targeted therapy with immunotherapy and combination therapy for metastatic melanoma. *Oncotarget*. 2017; 8:75675–86. <https://doi.org/10.18632/oncotarget.18523>. [PubMed]
  199. Salimifard S, Masjedi A, Hojjat-Farsangi M, Ghalamfarsa G, Irandoust M, Azizi G, Mohammadi H, Keramati MR, Jadidi-Niaragh F. Cancer associated fibroblasts as novel promising therapeutic targets in breast cancer. *Pathol Res Pract*. 2020; 216:152915. <https://doi.org/10.1016/j.prp.2020.152915>. [PubMed]
  200. Lappano R, Rigracciolo DC, Belfiore A, Maggiolini M, De Francesco EM. Cancer associated fibroblasts: role in breast cancer and potential as therapeutic targets. *Expert Opin Ther Targets*. 2020; 24:559–72. <https://doi.org/10.1080/14728222.2020.1751819>. [PubMed]
  201. Guo Z, Zhang H, Fu Y, Kuang J, Zhao B, Zhang L, Lin J, Lin S, Wu D, Xie G. Cancer-associated fibroblasts induce growth and radioresistance of breast cancer cells through

- paracrine IL-6. *Cell Death Discov.* 2023; 9:6. <https://doi.org/10.1038/s41420-023-01306-3>. [PubMed]
202. Ye F, Liang Y, Wang Y, Le Yang R, Luo D, Li Y, Jin Y, Han D, Chen B, Zhao W, Wang L, Chen X, Ma T, et al. Cancer-associated fibroblasts facilitate breast cancer progression through exosomal circTBPL1-mediated intercellular communication. *Cell Death Dis.* 2023; 14:471. <https://doi.org/10.1038/s41419-023-05986-8>. [PubMed]
  203. Fuso P, Muratore M, D'Angelo T, Paris I, Carbognin L, Tiberi G, Pavese F, Duranti S, Orlandi A, Tortora G, Scambia G, Fabi A. PI3K Inhibitors in Advanced Breast Cancer: The Past, The Present, New Challenges and Future Perspectives. *Cancers (Basel).* 2022; 14:2161. <https://doi.org/10.3390/cancers14092161>. [PubMed]
  204. Sirico M, D'Angelo A, Gianni C, Casadei C, Merloni F, De Giorgi U. Current State and Future Challenges for PI3K Inhibitors in Cancer Therapy. *Cancers (Basel).* 2023; 15:703. <https://doi.org/10.3390/cancers15030703>. [PubMed]
  205. Dey N, Barwick BG, Moreno CS, Ordanic-Kodani M, Chen Z, Oprea-Illies G, Tang W, Catzavelos C, Kerstann KF, Sledge GW Jr, Abramovitz M, Bouzyk M, De P, Leyland-Jones BR. Wnt signaling in triple negative breast cancer is associated with metastasis. *BMC Cancer.* 2013; 13:537. <https://doi.org/10.1186/1471-2407-13-537>. [PubMed]
  206. Li C, Yoshimura T, Tian M, Wang Y, Kondo T, Yamamoto KI, Fujisawa M, Ohara T, Sakaguchi M, Matsukawa A. Exosomal Wnt7a from a low metastatic subclone promotes lung metastasis of a highly metastatic subclone in the murine 4t1 breast cancer. *Breast Cancer Res.* 2022; 24:60. <https://doi.org/10.1186/s13058-022-01557-5>. [PubMed]
  207. Ren Q, Chen J, Liu Y. LRP5 and LRP6 in Wnt Signaling: Similarity and Divergence. *Front Cell Dev Biol.* 2021; 9:670960. <https://doi.org/10.3389/fcell.2021.670960>. [PubMed]
  208. Xu X, Zhang M, Xu F, Jiang S. Wnt signaling in breast cancer: biological mechanisms, challenges and opportunities. *Mol Cancer.* 2020; 19:165. <https://doi.org/10.1186/s12943-020-01276-5>. [PubMed]
  209. Pohl SG, Brook N, Agostino M, Arfuso F, Kumar AP, Dharmarajan A. Wnt signaling in triple-negative breast cancer. *Oncogenesis.* 2017; 6:e310. <https://doi.org/10.1038/oncsis.2017.14>. [PubMed]
  210. Dey N, Young B, Abramovitz M, Bouzyk M, Barwick B, De P, Leyland-Jones B. Differential activation of Wnt- $\beta$ -catenin pathway in triple negative breast cancer increases MMP7 in a PTEN dependent manner. *PLoS One.* 2013; 8:e77425. <https://doi.org/10.1371/journal.pone.0077425>. [PubMed]
  211. Geyer FC, Lacroix-Triki M, Savage K, Arnedos M, Lambros MB, MacKay A, Natrajan R, Reis-Filho JS.  $\beta$ -Catenin pathway activation in breast cancer is associated with triple-negative phenotype but not with CTNNB1 mutation. *Mod Pathol.* 2011; 24:209–31. <https://doi.org/10.1038/modpathol.2010.205>. [PubMed]
  212. Khramtsov AI, Khramtsova GF, Tretiakova M, Huo D, Olopade OI, Goss KH. Wnt/beta-catenin pathway activation is enriched in basal-like breast cancers and predicts poor outcome. *Am J Pathol.* 2010; 176:2911–20. <https://doi.org/10.2353/ajpath.2010.091125>. [PubMed]
  213. Yu QC, Verheyen EM, Zeng YA. Mammary Development and Breast Cancer: A Wnt Perspective. *Cancers (Basel).* 2016; 8:65. <https://doi.org/10.3390/cancers8070065>. [PubMed]
  214. He TC, Sparks AB, Rago C, Hermeking H, Zawel L, da Costa LT, Morin PJ, Vogelstein B, Kinzler KW. Identification of c-MYC as a target of the APC pathway. *Science.* 1998; 281:1509–12. <https://doi.org/10.1126/science.281.5382.1509>. [PubMed]
  215. Lin SY, Xia W, Wang JC, Kwong KY, Spohn B, Wen Y, Pestell RG, Hung MC. Beta-catenin, a novel prognostic marker for breast cancer: its roles in cyclin D1 expression and cancer progression. *Proc Natl Acad Sci U S A.* 2000; 97:4262–66. <https://doi.org/10.1073/pnas.060025397>. [PubMed]
  216. Shutman M, Zhurinsky J, Simcha I, Albanese C, D'Amico M, Pestell R, Ben-Ze'ev A. The cyclin D1 gene is a target of the beta-catenin/LEF-1 pathway. *Proc Natl Acad Sci U S A.* 1999; 96:5522–27. <https://doi.org/10.1073/pnas.96.10.5522>. [PubMed]
  217. Cowling VH, D'Cruz CM, Chodosh LA, Cole MD. c-Myc transforms human mammary epithelial cells through repression of the Wnt inhibitors DKK1 and SFRP1. *Mol Cell Biol.* 2007; 27:5135–46. <https://doi.org/10.1128/MCB.02282-06>. [PubMed]
  218. Conacci-Sorrell M, Simcha I, Ben-Yedidia T, Blechman J, Savagner P, Ben-Ze'ev A. Autoregulation of E-cadherin expression by cadherin-cadherin interactions: the roles of beta-catenin signaling, Slug, and MAPK. *J Cell Biol.* 2003; 163:847–57. <https://doi.org/10.1083/jcb.200308162>. [PubMed]
  219. Wellenstein MD, Coffelt SB, Duits DEM, van Miltenburg MH, Slagter M, de Rink I, Henneman L, Kas SM, Prekovic S, Hau CS, Vrijland K, Drenth AP, de Korte-Grimmerink R, et al. Loss of p53 triggers WNT-dependent systemic inflammation to drive breast cancer metastasis. *Nature.* 2019; 572:538–42. <https://doi.org/10.1038/s41586-019-1450-6>. [PubMed]
  220. Jang GB, Kim JY, Cho SD, Park KS, Jung JY, Lee HY, Hong IS, Nam JS. Blockade of Wnt/ $\beta$ -catenin signaling suppresses breast cancer metastasis by inhibiting CSC-like phenotype. *Sci Rep.* 2015; 5:12465. <https://doi.org/10.1038/srep12465>. [PubMed]
  221. Li Y, Welm B, Podsypanina K, Huang S, Chamorro M, Zhang X, Rowlands T, Egeblad M, Cowin P, Werb Z, Tan LK, Rosen JM, Varmus HE. Evidence that transgenes encoding components of the Wnt signaling pathway preferentially induce mammary cancers from progenitor cells. *Proc Natl Acad Sci U S A.* 2003; 100:15853–58. <https://doi.org/10.1073/pnas.2136825100>. [PubMed]

222. Ma Q, Yu J, Zhang X, Wu X, Deng G. Wnt/ $\beta$ -catenin signaling pathway-a versatile player in apoptosis and autophagy. *Biochimie*. 2023; 211:57–67. <https://doi.org/10.1016/j.biochi.2023.03.001>. [PubMed]
223. Kim H, Son S, Ko Y, Lim H, Lee J, Lee KM, Shin I. CYR61 confers chemoresistance by upregulating survivin expression in triple-negative breast cancer. *Carcinogenesis*. 2024; 45:510–19. <https://doi.org/10.1093/carcin/bgae013>. [PubMed]
224. Zhu H, Su Z, Ning J, Zhou L, Tan L, Sayed S, Song J, Wang Z, Li H, Sun Q, Liu S, Sha O, Leng F, et al. Transmembrane protein 97 exhibits oncogenic properties via enhancing LRP6-mediated Wnt signaling in breast cancer. *Cell Death Dis*. 2021; 12:912. <https://doi.org/10.1038/s41419-021-04211-8>. [PubMed]
225. Proffitt KD, Madan B, Ke Z, Pendharkar V, Ding L, Lee MA, Hannoush RN, Virshup DM. Pharmacological inhibition of the Wnt acyltransferase PORCN prevents growth of WNT-driven mammary cancer. *Cancer Res*. 2013; 73:502–7. <https://doi.org/10.1158/0008-5472.CAN-12-2258>. [PubMed]
226. Gurney A, Axelrod F, Bond CJ, Cain J, Chartier C, Donigan L, Fischer M, Chaudhari A, Ji M, Kapoun AM, Lam A, Lazetic S, Ma S, et al. Wnt pathway inhibition via the targeting of Frizzled receptors results in decreased growth and tumorigenicity of human tumors. *Proc Natl Acad Sci U S A*. 2012; 109:11717–22. <https://doi.org/10.1073/pnas.1120068109>. [PubMed]
227. Zhou L, Wang Z, Yu S, Xiong Y, Fan J, Lyu Y, Su Z, Song J, Liu S, Sun Q, Lu D. CDDO-Me Elicits Anti-Breast Cancer Activity by Targeting LRP6 and FZD7 Receptor Complex. *J Pharmacol Exp Ther*. 2020; 373:149–59. <https://doi.org/10.1124/jpet.119.263434>. [PubMed]
228. Cha PH, Cho YH, Lee SK, Lee J, Jeong WJ, Moon BS, Yun JH, Yang JS, Choi S, Yoon J, Kim HY, Kim MY, Kaduwal S, et al. Small-molecule binding of the axin RGS domain promotes  $\beta$ -catenin and Ras degradation. *Nat Chem Biol*. 2016; 12:593–600. <https://doi.org/10.1038/nchembio.2103>. [PubMed]
229. Thorne CA, Hanson AJ, Schneider J, Tahinci E, Orton D, Cselenyi CS, Jernigan KK, Meyers KC, Hang BI, Waterson AG, Kim K, Melancon B, Ghidu VP, et al. Small-molecule inhibition of Wnt signaling through activation of casein kinase 1 $\alpha$ . *Nat Chem Biol*. 2010; 6:829–36. <https://doi.org/10.1038/nchembio.453>. [PubMed]
230. Schmidtova S, Kalavska K, Liskova V, Plava J, Miklikova S, Kucerova L, Matuskova M, Rojikova L, Cierna Z, Rogozea A, Konig H, Albany C, Mego M, Chovanec M. Targeting of Deregulated Wnt/ $\beta$ -Catenin Signaling by PRI-724 and LGK974 Inhibitors in Germ Cell Tumor Cell Lines. *Int J Mol Sci*. 2021; 22:4263. <https://doi.org/10.3390/ijms22084263>. [PubMed]
231. Rodon J, Argilés G, Connolly RM, Vaishampayan U, de Jonge M, Garralda E, Giannakis M, Smith DC, Dobson JR, McLaughlin ME, Seroutou A, Ji Y, Morawiak J, et al. Phase I study of single-agent WNT974, a first-in-class Porcupine inhibitor, in patients with advanced solid tumours. *Br J Cancer*. 2021; 125:28–37. <https://doi.org/10.1038/s41416-021-01389-8>. [PubMed]
232. Diamond JR, Becerra C, Richards D, Mita A, Osborne C, O'Shaughnessy J, Zhang C, Henner R, Kapoun AM, Xu L, Stagg B, Uttamsingh S, Brachmann RK, et al. Phase Ib clinical trial of the anti-frizzled antibody vantiectumab (OMP-18R5) plus paclitaxel in patients with locally advanced or metastatic HER2-negative breast cancer. *Breast Cancer Res Treat*. 2020; 184:53–62. <https://doi.org/10.1007/s10549-020-05817-w>. [PubMed]
233. Jimeno A, Gordon M, Chugh R, Messersmith W, Mendelson D, Dupont J, Stagg R, Kapoun AM, Xu L, Uttamsingh S, Brachmann RK, Smith DC. A First-in-Human Phase I Study of the Anticancer Stem Cell Agent Ipafricept (OMP-54F28), a Decoy Receptor for Wnt Ligands, in Patients with Advanced Solid Tumors. *Clin Cancer Res*. 2017; 23:7490–97. <https://doi.org/10.1158/1078-0432.CCR-17-2157>. [PubMed]
234. Neiheisel A, Kaur M, Ma N, Havard P, Shenoy AK. Wnt pathway modulators in cancer therapeutics: An update on completed and ongoing clinical trials. *Int J Cancer*. 2022; 150:727–40. <https://doi.org/10.1002/ijc.33811>. [PubMed]
235. Gabata R, Harada K, Mizutani Y, Ouchi H, Yoshimura K, Sato Y, Kitao A, Kimura K, Kouji H, Miyashita T, Tajima H, Ohta T. Anti-tumor Activity of the Small Molecule Inhibitor PRI-724 Against  $\beta$ -Catenin-activated Hepatocellular Carcinoma. *Anticancer Res*. 2020; 40:5211–19. <https://doi.org/10.21873/anticancer.14524>. [PubMed]
236. El-Khoueiry AB, Ning Y, Yang D, Cole S, Kahn M, Zoghbi M, Berg J, Fujimori M, Inada T, Kouji H, Lenz HJ. A phase I first-in-human study of PRI-724 in patients (pts) with advanced solid tumors. *J Clin Oncol*. 2013; 31:2501. [https://doi.org/10.1200/jco.2013.31.15\\_suppl.2501](https://doi.org/10.1200/jco.2013.31.15_suppl.2501).
237. Huang SM, Mishina YM, Liu S, Cheung A, Stegmeier F, Michaud GA, Charlat O, Wielle E, Zhang Y, Wiessner S, Hild M, Shi X, Wilson CJ, et al. Tankyrase inhibition stabilizes axin and antagonizes Wnt signalling. *Nature*. 2009; 461:614–20. <https://doi.org/10.1038/nature08356>. [PubMed]
238. Bao R, Christova T, Song S, Angers S, Yan X, Attisano L. Inhibition of tankyrases induces Axin stabilization and blocks Wnt signalling in breast cancer cells. *PLoS One*. 2012; 7:e48670. <https://doi.org/10.1371/journal.pone.0048670>. [PubMed]
239. Brinch SA, Amundsen-Isaksen E, Espada S, Hammarström C, Aizenshtadt A, Olsen PA, Holmen L, Høyem M, Scholz H, Grødeland G, Sowa ST, Galera-Prat A, Lehtiö L, et al. The Tankyrase Inhibitor OM-153 Demonstrates Antitumor Efficacy and a Therapeutic Window in Mouse Models. *Cancer Res Commun*. 2022; 2:233–45. <https://doi.org/10.1158/2767-9764.CRC-22-0027>. [PubMed]
240. Li B, Liang J, Lu F, Zeng G, Zhang J, Ma Y, Liu P, Wang Q, Zhou Q, Chen L. Discovery of Novel Inhibitor for

- WNT/ $\beta$ -Catenin Pathway by Tankyrase 1/2 Structure-Based Virtual Screening. *Molecules*. 2020; 25:1680. <https://doi.org/10.3390/molecules25071680>. [PubMed]
241. Menon M, Elliott R, Bowers L, Balan N, Rafiq R, Costa-Cabral S, Munkonge F, Trindade I, Porter R, Campbell AD, Johnson ER, Esdar C, Buchstaller HP, et al. A novel tankyrase inhibitor, MSC2504877, enhances the effects of clinical CDK4/6 inhibitors. *Sci Rep*. 2019; 9:201. <https://doi.org/10.1038/s41598-018-36447-4>. [PubMed]
242. Reedijk M, Odorcic S, Chang L, Zhang H, Miller N, McCready DR, Lockwood G, Egan SE. High-level coexpression of JAG1 and NOTCH1 is observed in human breast cancer and is associated with poor overall survival. *Cancer Res*. 2005; 65:8530–37. <https://doi.org/10.1158/0008-5472.CAN-05-1069>. [PubMed]
243. Wang JW, Wei XL, Dou XW, Huang WH, Du CW, Zhang GJ. The association between Notch4 expression, and clinicopathological characteristics and clinical outcomes in patients with breast cancer. *Oncol Lett*. 2018; 15:8749–55. <https://doi.org/10.3892/ol.2018.8442>. [PubMed]
244. Zhong Y, Shen S, Zhou Y, Mao F, Lin Y, Guan J, Xu Y, Zhang S, Liu X, Sun Q. NOTCH1 is a poor prognostic factor for breast cancer and is associated with breast cancer stem cells. *Onco Targets Ther*. 2016; 9:6865–71. <https://doi.org/10.2147/OTT.S109606>. [PubMed]
245. Zhou B, Lin W, Long Y, Yang Y, Zhang H, Wu K, Chu Q. Notch signaling pathway: architecture, disease, and therapeutics. *Signal Transduct Target Ther*. 2022; 7:95. <https://doi.org/10.1038/s41392-022-00934-y>. [PubMed]
246. Kontomanolis EN, Kalagasidou S, Pouliliou S, Anthoulaki X, Georgiou N, Papamanolis V, Fasoulakis ZN. The Notch Pathway in Breast Cancer Progression. *ScientificWorldJournal*. 2018; 2018:2415489. <https://doi.org/10.1155/2018/2415489>. [PubMed]
247. Kopan R. Notch signaling. *Cold Spring Harb Perspect Biol*. 2012; 4:a011213. <https://doi.org/10.1101/cshperspect.a011213>. [PubMed]
248. Cohen B, Shimizu M, Izrailit J, Ng NF, Buchman Y, Pan JG, Dering J, Reedijk M. Cyclin D1 is a direct target of JAG1-mediated Notch signaling in breast cancer. *Breast Cancer Res Treat*. 2010; 123:113–24. <https://doi.org/10.1007/s10549-009-0621-9>. [PubMed]
249. D'Angelo RC, Ouzounova M, Davis A, Choi D, Tchuengkam SM, Kim G, Luther T, Quraishi AA, Senbabaoglu Y, Conley SJ, Clouthier SG, Hassan KA, Wicha MS, Korkaya H. Notch reporter activity in breast cancer cell lines identifies a subset of cells with stem cell activity. *Mol Cancer Ther*. 2015; 14:779–87. <https://doi.org/10.1158/1535-7163.MCT-14-0228>. [PubMed]
250. Dontu G, Jackson KW, McNicholas E, Kawamura MJ, Abdallah WM, Wicha MS. Role of Notch signaling in cell-fate determination of human mammary stem/progenitor cells. *Breast Cancer Res*. 2004; 6:R605-15. <https://doi.org/10.1186/bcr920>. [PubMed]
251. Harrison H, Simões BM, Rogerson L, Howell SJ, Landberg G, Clarke RB. Oestrogen increases the activity of oestrogen receptor negative breast cancer stem cells through paracrine EGFR and Notch signalling. *Breast Cancer Res*. 2013; 15:R21. <https://doi.org/10.1186/bcr3396>. [PubMed]
252. Aster JC, Pear WS, Blacklow SC. The Varied Roles of Notch in Cancer. *Annu Rev Pathol*. 2017; 12:245–75. <https://doi.org/10.1146/annurev-pathol-052016-100127>. [PubMed]
253. Stylianou S, Clarke RB, Brennan K. Aberrant activation of notch signaling in human breast cancer. *Cancer Res*. 2006; 66:1517–25. <https://doi.org/10.1158/0008-5472.CAN-05-3054>. [PubMed]
254. Chen S, Leng P, Guo J, Zhou H. FBXW7 in breast cancer: mechanism of action and therapeutic potential. *J Exp Clin Cancer Res*. 2023; 42:226. <https://doi.org/10.1186/s13046-023-02767-1>. [PubMed]
255. Pece S, Serresi M, Santolini E, Capra M, Hulleman E, Galimberti V, Zurrida S, Maisonneuve P, Viale G, Di Fiore PP. Loss of negative regulation by Numb over Notch is relevant to human breast carcinogenesis. *J Cell Biol*. 2004; 167:215–21. <https://doi.org/10.1083/jcb.200406140>. [PubMed]
256. Zhang S, Miyakawa A, Wickström M, Dyberg C, Louhivuori L, Varas-Godoy M, Kempainen K, Kanatani S, Kaczynska D, Ellström ID, Elfman L, Kronqvist P, Repo H, et al. GIT1 protects against breast cancer growth through negative regulation of Notch. *Nat Commun*. 2022; 13:1537. <https://doi.org/10.1038/s41467-022-28631-y>. [PubMed]
257. Wang K, Zhang Q, Li D, Ching K, Zhang C, Zheng X, Ozeck M, Shi S, Li X, Wang H, Rejto P, Christensen J, Olson P. PEST domain mutations in Notch receptors comprise an oncogenic driver segment in triple-negative breast cancer sensitive to a  $\gamma$ -secretase inhibitor. *Clin Cancer Res*. 2015; 21:1487–96. <https://doi.org/10.1158/1078-0432.CCR-14-1348>. [PubMed]
258. Kumar S, Srivastav RK, Wilkes DW, Ross T, Kim S, Kowalski J, Chatla S, Zhang Q, Nayak A, Guha M, Fuchs SY, Thomas C, Chakrabarti R. Estrogen-dependent DLL1-mediated Notch signaling promotes luminal breast cancer. *Oncogene*. 2019; 38:2092–107. <https://doi.org/10.1038/s41388-018-0562-z>. [PubMed]
259. Rizzo P, Miao H, D'Souza G, Osipo C, Song LL, Yun J, Zhao H, Mascarenhas J, Wyatt D, Antico G, Hao L, Yao K, Rajan P, et al. Cross-talk between notch and the estrogen receptor in breast cancer suggests novel therapeutic approaches. *Cancer Res*. 2008; 68:5226–35. <https://doi.org/10.1158/0008-5472.CAN-07-5744>. [PubMed]
260. Takebe N, Nguyen D, Yang SX. Targeting notch signaling pathway in cancer: clinical development advances and challenges. *Pharmacol Ther*. 2014; 141:140–49. <https://doi.org/10.1016/j.pharmthera.2013.09.005>. [PubMed]
261. Majumder S, Crabtree JS, Golde TE, Minter LM, Osborne BA, Miele L. Targeting Notch in oncology: the path

- forward. *Nat Rev Drug Discov.* 2021; 20:125–44. <https://doi.org/10.1038/s41573-020-00091-3>. [PubMed]
262. Means-Powell JA, Mayer IA, Ismail-Khan R, Del Valle L, Tonetti D, Abramson VG, Sanders MS, Lush RM, Sorrentino C, Majumder S, Miele L. A Phase Ib Dose Escalation Trial of RO4929097 (a  $\gamma$ -secretase inhibitor) in Combination with Exemestane in Patients with ER + Metastatic Breast Cancer (MBC). *Clin Breast Cancer.* 2022; 22:103–14. <https://doi.org/10.1016/j.clbc.2021.10.013>. [PubMed]
263. Jia X, Wang W, Xu Z, Wang S, Wang T, Wang M, Wu M. A humanized anti-DLL4 antibody promotes dysfunctional angiogenesis and inhibits breast tumor growth. *Sci Rep.* 2016; 6:27985. <https://doi.org/10.1038/srep27985>. [PubMed]
264. Sharma A, Paranjape AN, Rangarajan A, Dighe RR. A monoclonal antibody against human Notch1 ligand-binding domain depletes subpopulation of putative breast cancer stem-like cells. *Mol Cancer Ther.* 2012; 11:77–86. <https://doi.org/10.1158/1535-7163.MCT-11-0508>. [PubMed]
265. Vigolo M, Urech C, Lamy S, Monticone G, Zabaleta J, Hossain F, Wyczzechowska D, Del Valle L, O'Regan RM, Miele L, Lehal R, Majumder S. The Efficacy of CB-103, a First-in-Class Transcriptional Notch Inhibitor, in Preclinical Models of Breast Cancer. *Cancers (Basel).* 2023; 15:3957. <https://doi.org/10.3390/cancers15153957>. [PubMed]
266. Schott AF, Landis MD, Dontu G, Griffith KA, Layman RM, Krop I, Paskett LA, Wong H, Dobrolecki LE, Lewis MT, Froehlich AM, Paraniham J, Hayes DF, et al. Preclinical and clinical studies of gamma secretase inhibitors with docetaxel on human breast tumors. *Clin Cancer Res.* 2013; 19:1512–24. <https://doi.org/10.1158/1078-0432.CCR-11-3326>. [PubMed]
267. Smith DC, Eisenberg PD, Manikhas G, Chugh R, Gubens MA, Stagg RJ, Kapoun AM, Xu L, Dupont J, Sikic B. A phase I dose escalation and expansion study of the anticancer stem cell agent demcizumab (anti-DLL4) in patients with previously treated solid tumors. *Clin Cancer Res.* 2014; 20:6295–303. <https://doi.org/10.1158/1078-0432.CCR-14-1373>. [PubMed]
268. Davis JD, Lin SY. DNA damage and breast cancer. *World J Clin Oncol.* 2011; 2:329–38. <https://doi.org/10.5306/wjco.v2.i9.329>. [PubMed]
269. Li LY, Guan YD, Chen XS, Yang JM, Cheng Y. DNA Repair Pathways in Cancer Therapy and Resistance. *Front Pharmacol.* 2021; 11:629266. <https://doi.org/10.3389/fphar.2020.629266>. [PubMed]
270. Pearl LH, Schierz AC, Ward SE, Al-Lazikani B, Pearl FM. Therapeutic opportunities within the DNA damage response. *Nat Rev Cancer.* 2015; 15:166–80. <https://doi.org/10.1038/nrc3891>. [PubMed]
271. Hakem R. DNA-damage repair; the good, the bad, and the ugly. *EMBO J.* 2008; 27:589–605. <https://doi.org/10.1038/emboj.2008.15>. [PubMed]
272. Kulkarni S, Brownlie J, Jeyapalan JN, Mongan NP, Rakha EA, Madhusudan S. Evolving DNA repair synthetic lethality targets in cancer. *Biosci Rep.* 2022; 42:BSR20221713. <https://doi.org/10.1042/BSR20221713>. [PubMed]
273. He BS, Xu T, Pan YQ, Wang HJ, Cho WC, Lin K, Sun HL, Gao TY, Wang SK. Nucleotide excision repair pathway gene polymorphisms are linked to breast cancer risk in a Chinese population. *Oncotarget.* 2016; 7:84872–82. <https://doi.org/10.18632/oncotarget.12744>. [PubMed]
274. Tufail M. DNA repair pathways in breast cancer: from mechanisms to clinical applications. *Breast Cancer Res Treat.* 2023; 200:305–21. <https://doi.org/10.1007/s10549-023-06995-z>. [PubMed]
275. Gao X, Wang J, Li M, Wang J, Lv J, Zhang L, Sun C, Ji J, Yang W, Zhao Z, Mao W. Berberine attenuates XRCC1-mediated base excision repair and sensitizes breast cancer cells to the chemotherapeutic drugs. *J Cell Mol Med.* 2019; 23:6797–804. <https://doi.org/10.1111/jcmm.14560>. [PubMed]
276. Kondo N, Takahashi A, Ono K, Ohnishi T. DNA damage induced by alkylating agents and repair pathways. *J Nucleic Acids.* 2010; 2010:543531. <https://doi.org/10.4061/2010/543531>. [PubMed]
277. Calvo JA, Moroski-Erkul CA, Lake A, Eichinger LW, Shah D, Jhun I, Limsirichai P, Bronson RT, Christiani DC, Meira LB, Samson LD. Aag DNA glycosylase promotes alkylation-induced tissue damage mediated by Parp1. *PLoS Genet.* 2013; 9:e1003413. <https://doi.org/10.1371/journal.pgen.1003413>. [PubMed]
278. Jiang J, Zhang X, Yang H, Wang W. Polymorphisms of DNA repair genes: ADPRT, XRCC1, and XPD and cancer risk in genetic epidemiology. *Methods Mol Biol.* 2009; 471:305–33. [https://doi.org/10.1007/978-1-59745-416-2\\_16](https://doi.org/10.1007/978-1-59745-416-2_16). [PubMed]
279. Lee KJ, Piatt CG, Andrews JF, Mann E, Nagel ZD, Gassman NR. Defective base excision repair in the response to DNA damaging agents in triple negative breast cancer. *PLoS One.* 2019; 14:e0223725. <https://doi.org/10.1371/journal.pone.0223725>. [PubMed]
280. Patrono C, Sterpone S, Testa A, Cozzi R. Polymorphisms in base excision repair genes: Breast cancer risk and individual radiosensitivity. *World J Clin Oncol.* 2014; 5:874–82. <https://doi.org/10.5306/wjco.v5.i5.874>. [PubMed]
281. Qu Y, Qin S, Yang Z, Li Z, Liang Q, Long T, Wang W, Zeng D, Zhao Q, Dai Z, Ni Q, Zhao F, Kim W, Hou J. Targeting the DNA repair pathway for breast cancer therapy: Beyond the molecular subtypes. *Biomed Pharmacother.* 2023; 169:115877. <https://doi.org/10.1016/j.biopha.2023.115877>. [PubMed]
282. Fu YP, Yu JC, Cheng TC, Lou MA, Hsu GC, Wu CY, Chen ST, Wu HS, Wu PE, Shen CY. Breast cancer risk associated with genotypic polymorphism of the nonhomologous end-joining genes: a multigenic study on cancer susceptibility. *Cancer Res.* 2003; 63:2440–46. [PubMed]

283. Fu X, Tan W, Song Q, Pei H, Li J. BRCA1 and Breast Cancer: Molecular Mechanisms and Therapeutic Strategies. *Front Cell Dev Biol.* 2022; 10:813457. <https://doi.org/10.3389/fcell.2022.813457>. [PubMed]
284. Prakash R, Zhang Y, Feng W, Jasin M. Homologous recombination and human health: the roles of BRCA1, BRCA2, and associated proteins. *Cold Spring Harb Perspect Biol.* 2015; 7:a016600. <https://doi.org/10.1101/cshperspect.a016600>. [PubMed]
285. Kuchenbaecker KB, Hopper JL, Barnes DR, Phillips KA, Mooij TM, Roos-Blom MJ, Jervis S, van Leeuwen FE, Milne RL, Andrieu N, Goldgar DE, Terry MB, Rookus MA, et al, and BRCA1 and BRCA2 Cohort Consortium. Risks of Breast, Ovarian, and Contralateral Breast Cancer for BRCA1 and BRCA2 Mutation Carriers. *JAMA.* 2017; 317:2402–16. <https://doi.org/10.1001/jama.2017.7112>. [PubMed]
286. Clark CA, Yang ES. Harnessing DNA Repair Defects to Augment Immune-Based Therapies in Triple-Negative Breast Cancer. *Front Oncol.* 2021; 11:703802. <https://doi.org/10.3389/fonc.2021.703802>. [PubMed]
287. Larsen MJ, Kruse TA, Tan Q, Lænkholm AV, Bak M, Lykkesfeldt AE, Sørensen KP, Hansen TV, Ejlersen B, Gerdes AM, Thomassen M. Classifications within molecular subtypes enables identification of BRCA1/BRCA2 mutation carriers by RNA tumor profiling. *PLoS One.* 2013; 8:e64268. <https://doi.org/10.1371/journal.pone.0064268>. [PubMed]
288. Mavaddat N, Barrowdale D, Andrulis IL, Domchek SM, Eccles D, Nevanlinna H, Ramus SJ, Spurdle A, Robson M, Sherman M, Mulligan AM, Couch FJ, Engel C, et al, and HEBON, and EMBRACE, and GEMO Study Collaborators, and kConFab Investigators, and Consortium of Investigators of Modifiers of BRCA1/2. Pathology of breast and ovarian cancers among BRCA1 and BRCA2 mutation carriers: results from the Consortium of Investigators of Modifiers of BRCA1/2 (CIMBA). *Cancer Epidemiol Biomarkers Prev.* 2012; 21:134–47. <https://doi.org/10.1158/1055-9965.EPI-11-0775>. [PubMed]
289. Smith J, Mun Tho L, Xu N, Gillespie DA. Chapter 3 - The ATM–Chk2 and ATR–Chk1 Pathways in DNA Damage Signaling and Cancer. In: Vande Woude GF, Klein G (eds). *Advances in Cancer Research*, vol. 108. Academic Press. 2010; 73–112. <https://doi.org/10.1016/B978-0-12-380888-2.00003-0>. [PubMed]
290. Abdel-Fatah TM, Arora A, Alsubhi N, Agarwal D, Moseley PM, Perry C, Doherty R, Chan SY, Green AR, Rakha E, Ball G, Ellis IO, Madhusudan S. Clinicopathological significance of ATM-Chk2 expression in sporadic breast cancers: a comprehensive analysis in large cohorts. *Neoplasia.* 2014; 16:982–91. <https://doi.org/10.1016/j.neo.2014.09.009>. [PubMed]
291. Dorling L, Carvalho S, Allen J, González-Neira A, Luccarini C, Wahlström C, Pooley KA, Parsons MT, Fortunato C, Wang Q, Bolla MK, Dennis J, Keeman R, and Breast Cancer Association Consortium. Breast Cancer Risk Genes - Association Analysis in More than 113,000 Women. *N Engl J Med.* 2021; 384:428–39. <https://doi.org/10.1056/NEJMoa1913948>. [PubMed]
292. Menezes MCS, Raheem F, Mina L, Ernst B, Batalini F. PARP Inhibitors for Breast Cancer: Germline *BRCA1/2* and Beyond. *Cancers (Basel).* 2022; 14:4332. <https://doi.org/10.3390/cancers14174332>. [PubMed]
293. Nevanlinna H, Bartek J. The CHEK2 gene and inherited breast cancer susceptibility. *Oncogene.* 2006; 25:5912–19. <https://doi.org/10.1038/sj.onc.1209877>. [PubMed]
294. Di Benedetto A, Ercolani C, Mottolese M, Sperati F, Pizzuti L, Vici P, Terrenato I, Shaaban AM, Humphries MP, Di Lauro L, Barba M, Vitale I, Ciliberto G, et al. Analysis of the ATR-Chk1 and ATM-Chk2 pathways in male breast cancer revealed the prognostic significance of ATR expression. *Sci Rep.* 2017; 7:8078. <https://doi.org/10.1038/s41598-017-07366-7>. [PubMed]
295. Farmer H, McCabe N, Lord CJ, Tutt AN, Johnson DA, Richardson TB, Santarosa M, Dillon KJ, Hickson I, Knights C, Martin NM, Jackson SP, Smith GC, Ashworth A. Targeting the DNA repair defect in BRCA mutant cells as a therapeutic strategy. *Nature.* 2005; 434:917–21. <https://doi.org/10.1038/nature03445>. [PubMed]
296. Li Q, Qian W, Zhang Y, Hu L, Chen S, Xia Y. A new wave of innovations within the DNA damage response. *Signal Transduct Target Ther.* 2023; 8:338. <https://doi.org/10.1038/s41392-023-01548-8>. [PubMed]
297. Tutt ANJ, Garber JE, Kaufman B, Viale G, Fumagalli D, Rastogi P, Gelber RD, de Azambuja E, Fielding A, Balmaña J, Domchek SM, Gelmon KA, Hollingsworth SJ, et al, and OlympiA Clinical Trial Steering Committee and Investigators. Adjuvant Olaparib for Patients with *BRCA1*- or *BRCA2*-Mutated Breast Cancer. *N Engl J Med.* 2021; 384:2394–405. <https://doi.org/10.1056/NEJMoa2105215>. [PubMed]
298. Robson M, Im SA, Senkus E, Xu B, Domchek SM, Masuda N, Delaloge S, Li W, Tung N, Armstrong A, Wu W, Goessl C, Runswick S, Conte P. Olaparib for Metastatic Breast Cancer in Patients with a Germline BRCA Mutation. *N Engl J Med.* 2017; 377:523–33. <https://doi.org/10.1056/NEJMoa1706450>. [PubMed]
299. Mirza-Aghazadeh-Attari M, Recio MJ, Darband SG, Kaviani M, Safa A, Mihanfar A, Sadighparvar S, Karimian A, Alemi F, Majidinia M, Yousefi B. DNA damage response and breast cancer development: Possible therapeutic applications of ATR, ATM, PARP, BRCA1 inhibition. *DNA Repair (Amst).* 2021; 98:103032. <https://doi.org/10.1016/j.dnarep.2020.103032>. [PubMed]
300. Dilmac S, Ozpolat B. Mechanisms of PARP-Inhibitor-Resistance in BRCA-Mutated Breast Cancer and New Therapeutic Approaches. *Cancers (Basel).* 2023; 15:3642. <https://doi.org/10.3390/cancers15143642>. [PubMed]
301. Zhu H, Wang J, Zhang Q, Pan X, Zhang J. Novel strategies and promising opportunities for targeted protein degradation:



- An innovative therapeutic approach to overcome cancer resistance. *Pharmacol Ther.* 2023; 244:108371. <https://doi.org/10.1016/j.pharmthera.2023.108371>. [PubMed]
302. Noblejas-López MDM, Tébar-García D, López-Rosa R, Alcaraz-Sanabria A, Cristóbal-Cueto P, Pinedo-Serrano A, Rivas-García L, Galán-Moya EM. TACKling Cancer by Targeting Selective Protein Degradation. *Pharmaceutics.* 2023; 15:2442. <https://doi.org/10.3390/pharmaceutics15102442>. [PubMed]
  303. Lan HR, Chen M, Yao SY, Chen JX, Jin KT. Bispecific antibodies revolutionizing breast cancer treatment: a comprehensive overview. *Front Immunol.* 2023; 14:1266450. <https://doi.org/10.3389/fimmu.2023.1266450>. [PubMed]
  304. Dees S, Ganesan R, Singh S, Grewal IS. Bispecific Antibodies for Triple Negative Breast Cancer. *Trends Cancer.* 2021; 7:162–73. <https://doi.org/10.1016/j.trecan.2020.09.004>. [PubMed]
  305. Zhang B, Shi J, Shi X, Xu X, Gao L, Li S, Liu M, Gao M, Jin S, Zhou J, Fan D, Wang F, Ji Z, et al. Development and evaluation of a human CD47/HER2 bispecific antibody for Trastuzumab-resistant breast cancer immunotherapy. *Drug Resist Updat.* 2024; 74:101068. <https://doi.org/10.1016/j.drug.2024.101068>. [PubMed]
  306. Meric-Bernstam F, Beeram M, Hamilton E, Oh DY, Hanna DL, Kang YK, Elimova E, Chaves J, Goodwin R, Lee J, Nabell L, Rha SY, Mayordomo J, et al. Zanidatamab, a novel bispecific antibody, for the treatment of locally advanced or metastatic HER2-expressing or HER2-amplified cancers: a phase 1, dose-escalation and expansion study. *Lancet Oncol.* 2022; 23:1558–70. [https://doi.org/10.1016/s1470-2045\(22\)00621-0](https://doi.org/10.1016/s1470-2045(22)00621-0). [PubMed]
  307. Al-Hawary SIS, Saleh EAM, Mamajanov NA, S Gilmanova N, Alsaab HO, Alghamdi A, Ansari SA, Alawady AHR, Alsaalamy AH, Ibrahim AJ. Breast cancer vaccines; A comprehensive and updated review. *Pathol Res Pract.* 2023; 249:154735. <https://doi.org/10.1016/j.prp.2023.154735>. [PubMed]
  308. Zhu SY, Yu KD. Breast Cancer Vaccines: Disappointing or Promising? *Front Immunol.* 2022; 13:828386. <https://doi.org/10.3389/fimmu.2022.828386>. [PubMed]
  309. You Z, Zhou W, Weng J, Feng H, Liang P, Li Y, Shi F. Application of HER2 peptide vaccines in patients with breast cancer: a systematic review and meta-analysis. *Cancer Cell Int.* 2021; 21:489. <https://doi.org/10.1186/s12935-021-02187-1>. [PubMed]
  310. Mittendorf EA, Gurney JM, Storrer CE, Shriver CD, Ponniah S, Peoples GE. Vaccination with a HER2/neu peptide induces intra-and inter-antigenic epitope spreading in patients with early stage breast cancer. *Surgery.* 2006; 139:407–18. <https://doi.org/10.1016/j.surg.2005.06.059>. [PubMed]
  311. Ko HL, Ren EC. Functional Aspects of PARP1 in DNA Repair and Transcription. *Biomolecules.* 2012; 2:524–48. <https://doi.org/10.3390/biom2040524>. [PubMed]
  312. Herencia-Ropero A, Llop-Guevara A, Staniszewska AD, Domènech-Vivó J, García-Galea E, Moles-Fernández A, Pedretti F, Domènech H, Rodríguez O, Guzmán M, Arenas EJ, Verdaguer H, Calero-Nieto FJ, et al. The PARP1 selective inhibitor saruparib (AZD5305) elicits potent and durable antitumor activity in patient-derived BRCA1/2-associated cancer models. *Genome Med.* 2024; 16:107. <https://doi.org/10.1186/s13073-024-01370-z>. [PubMed]
  313. Wu L, Wang J, Li N, Zhang J, Wang D, Jiang S. A phase 1 study of HRS-1167 (M9466), a highly selective PARP1 inhibitor, in patients (pts) with advanced solid tumors. *Journal of Clinical Oncology.* 2024; 42:3154. [https://doi.org/10.1200/JCO.2024.42.16\\_suppl.3154](https://doi.org/10.1200/JCO.2024.42.16_suppl.3154).
  314. Priya B, Ravi S, Kirubakaran S. Targeting ATM and ATR for cancer therapeutics: Inhibitors in clinic. *Drug Discov Today.* 2023; 28:103662. <https://doi.org/10.1016/j.drudis.2023.103662>. [PubMed]
  315. Buocikova V, Rios-Mondragon I, Pilalis E, Chatziioannou A, Miklikova S, Mego M, Pajuste K, Rucins M, Yamani NE, Longhin EM, Sobolev A, Freixanet M, Puntos V, et al. Epigenetics in Breast Cancer Therapy-New Strategies and Future Nanomedicine Perspectives. *Cancers (Basel).* 2020; 12:3622. <https://doi.org/10.3390/cancers12123622>. [PubMed]
  316. Garcia-Martinez L, Zhang Y, Nakata Y, Chan HL, Morey L. Epigenetic mechanisms in breast cancer therapy and resistance. *Nat Commun.* 2021; 12:1786. <https://doi.org/10.1038/s41467-021-22024-3>. [PubMed]
  317. Kim A, Mo K, Kwon H, Choe S, Park M, Kwak W, Yoon H. Epigenetic Regulation in Breast Cancer: Insights on Epidrugs. *Epigenomes.* 2023; 7:6. <https://doi.org/10.3390/epigenomes7010006>. [PubMed]
  318. Vahidfar N, Aghanejad A, Ahmadzadehfar H, Farzanehfar S, Eppard E. Theranostic Advances in Breast Cancer in Nuclear Medicine. *Int J Mol Sci.* 2021; 22:4597. <https://doi.org/10.3390/ijms22094597>. [PubMed]
  319. Edmonds CE, O'Brien SR, Mankoff DA, Pantel AR. Novel applications of molecular imaging to guide breast cancer therapy. *Cancer Imaging.* 2022; 22:31. <https://doi.org/10.1186/s40644-022-00468-0>. [PubMed]
  320. Cobleigh MA, Vogel CL, Tripathy D, Robert NJ, Scholl S, Fehrenbacher L, Wolter JM, Paton V, Shak S, Lieberman G, Slamon DJ. Multinational study of the efficacy and safety of humanized anti-HER2 monoclonal antibody in women who have HER2-overexpressing metastatic breast cancer that has progressed after chemotherapy for metastatic disease. *J Clin Oncol.* 1999; 17:2639–48. <https://doi.org/10.1200/JCO.1999.17.9.2639>. [PubMed]
  321. Piccart-Gebhart MJ, Procter M, Leyland-Jones B, Goldhirsch A, Untch M, Smith I, Gianni L, Baselga J, Bell R, Jackisch C, Cameron D, Dowsett M, Barrios CH, et al, and Herceptin Adjuvant (HERA) Trial Study Team. Trastuzumab after adjuvant chemotherapy in HER2-positive breast cancer. *N Engl J Med.* 2005; 353:1659–72. <https://doi.org/10.1056/NEJMoa052306>. [PubMed]

322. Swain SM, Kim SB, Cortés J, Ro J, Semiglazov V, Campone M, Ciruelos E, Ferrero JM, Schneeweiss A, Knott A, Clark E, Ross G, Benyunes MC, Baselga J. Pertuzumab, trastuzumab, and docetaxel for HER2-positive metastatic breast cancer (CLEOPATRA study): overall survival results from a randomised, double-blind, placebo-controlled, phase 3 study. *Lancet Oncol.* 2013; 14:461–71. [https://doi.org/10.1016/S1470-2045\(13\)70130-X](https://doi.org/10.1016/S1470-2045(13)70130-X). [PubMed]
323. Geyer CE, Forster J, Lindquist D, Chan S, Romieu CG, Pienkowski T, Jagiello-Gruszfeld A, Crown J, Chan A, Kaufman B, Skarlos D, Campone M, Davidson N, et al. Lapatinib plus capecitabine for HER2-positive advanced breast cancer. *N Engl J Med.* 2006; 355:2733–43. <https://doi.org/10.1056/NEJMoa064320>. [PubMed]
324. Martin M, Holmes FA, Ejlertsen B, Delaloge S, Moy B, Iwata H, von Minckwitz G, Chia SKL, Mansi J, Barrios CH, Gnant M, Tomašević Z, Denduluri N, et al, and ExteNET Study Group. Neratinib after trastuzumab-based adjuvant therapy in HER2-positive breast cancer (ExteNET): 5-year analysis of a randomised, double-blind, placebo-controlled, phase 3 trial. *Lancet Oncol.* 2017; 18:1688–700. [https://doi.org/10.1016/S1470-2045\(17\)30717-9](https://doi.org/10.1016/S1470-2045(17)30717-9). [PubMed]
325. von Minckwitz G, Huang CS, Mano MS, Loibl S, Mamounas EP, Untch M, Wolmark N, Rastogi P, Schneeweiss A, Redondo A, Fischer HH, Jacot W, Conlin AK, et al, and KATHERINE Investigators. Trastuzumab Emtansine for Residual Invasive HER2-Positive Breast Cancer. *N Engl J Med.* 2019; 380:617–28. <https://doi.org/10.1056/NEJMoa1814017>. [PubMed]
326. Modi S, Jacot W, Yamashita T, Sohn J, Vidal M, Tokunaga E, Tsurutani J, Ueno NT, Prat A, Chae YS, Lee KS, Niikura N, Park YH, et al, and DESTINY-Breast04 Trial Investigators. Trastuzumab Deruxtecan in Previously Treated HER2-Low Advanced Breast Cancer. *N Engl J Med.* 2022; 387:9–20. <https://doi.org/10.1056/NEJMoa2203690>. [PubMed]
327. Rugo HS, Im SA, Cardoso F, Cortes J, Curigliano G, Musolino A, Pegram MD, Bachelot T, Wright GS, Saura C, Escrivá-de-Romaní S, De Laurentiis M, Schwartz GN, et al, and SOPHIA Study Group. Margetuximab Versus Trastuzumab in Patients With Previously Treated HER2-Positive Advanced Breast Cancer (SOPHIA): Final Overall Survival Results From a Randomized Phase 3 Trial. *J Clin Oncol.* 2023; 41:198–205. <https://doi.org/10.1200/JCO.21.02937>. [PubMed]
328. Litton JK, Rugo HS, Ettl J, Hurvitz SA, Gonçalves A, Lee KH, Fehrenbacher L, Yerushalmi R, Mina LA, Martin M, Roché H, Im YH, Quek RGW, et al. Talazoparib in Patients with Advanced Breast Cancer and a Germline BRCA Mutation. *N Engl J Med.* 2018; 379:753–63. <https://doi.org/10.1056/NEJMoa1802905>. [PubMed]
